# Supplementary material for: Cost of illness of patient-reported adverse drug events: a population-based cross-sectional survey
Source: PubMed Central journal article supplement — BMJ Open. 2013 Jun 13;3(6):e002574. doi: 10.1136/bmjopen-2013-002574 (PMC3686161; doi:10.1136/bmjopen-2013-002574), 2013-06-13
Supplement: bmjopen-2013-002574.draft_revisions.pdf [file bmjopen-2013-002574.draft_revisions.pdf]

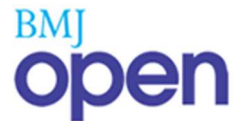

**Cost-of-Illness of patient-reported Adverse Drug Events – A  
population-based cross-sectional survey**

|                                 |                                                                                                                                                                                                                                                                                                                                                                                                                                                                                                                                                                                                                                                                                                             |
|---------------------------------|-------------------------------------------------------------------------------------------------------------------------------------------------------------------------------------------------------------------------------------------------------------------------------------------------------------------------------------------------------------------------------------------------------------------------------------------------------------------------------------------------------------------------------------------------------------------------------------------------------------------------------------------------------------------------------------------------------------|
| Journal:                        | <i>BMJ Open</i>                                                                                                                                                                                                                                                                                                                                                                                                                                                                                                                                                                                                                                                                                             |
| Manuscript ID:                  | bmjopen-2013-002574                                                                                                                                                                                                                                                                                                                                                                                                                                                                                                                                                                                                                                                                                         |
| Article Type:                   | Research                                                                                                                                                                                                                                                                                                                                                                                                                                                                                                                                                                                                                                                                                                    |
| Date Submitted by the Author:   | 08-Jan-2013                                                                                                                                                                                                                                                                                                                                                                                                                                                                                                                                                                                                                                                                                                 |
| Complete List of Authors:       | Gyllensten, Hanna; Nordic school of public health NHV, Rehnberg, Clas; Karolinska Institutet, Department of Learning, Informatics, Management and Ethics – LIME<br>Jönsson, Anna; Faculty of Health Sciences, Linköping University, Department of Drug Research/Clinical Pharmacology; County Council of Östergötland, Department of Clinical Pharmacology<br>Petzold, Max; Sahlgrenska academy, University of Gothenburg, Department of Public Health and Community Medicine<br>Carlsten, Anders; Nordic school of public health NHV, Andersson Sundell, Karolina; Nordic school of public health NHV, ; Sahlgrenska Academy, University of Gothenburg, Department of Public Health and Community Medicine |
| <b>Primary Subject Heading</b>: | Public health                                                                                                                                                                                                                                                                                                                                                                                                                                                                                                                                                                                                                                                                                               |
| Secondary Subject Heading:      | Epidemiology, Health economics, Health services research, Pharmacology and therapeutics                                                                                                                                                                                                                                                                                                                                                                                                                                                                                                                                                                                                                     |
| Keywords:                       | EPIDEMIOLOGY, HEALTH ECONOMICS, Health & safety < HEALTH SERVICES ADMINISTRATION & MANAGEMENT, PUBLIC HEALTH, Adverse events < THERAPEUTICS                                                                                                                                                                                                                                                                                                                                                                                                                                                                                                                                                                 |
|                                 |                                                                                                                                                                                                                                                                                                                                                                                                                                                                                                                                                                                                                                                                                                             |

SCHOLARONE™  
Manuscripts

**TITLE**

Cost-of-Illness of patient-reported Adverse Drug Events – A population-based cross-sectional survey

**Authors**

Hanna Gyllensten, DrPH-student (**corresponding author**)

Nordic School of Public Health NHV, Box 121 33, SE-402 42 Gothenburg, Sweden

Phone: +46-31-693925

Fax: +46-31-691777

Clas Rehnberg, Professor

Department of Learning, Informatics, Management and Ethics – LIME, Karolinska Institutet, Stockholm, Sweden

Anna K. Jönsson, PhD

Department of Drug Research/Clinical Pharmacology, Faculty of Health Sciences, Linköping University, Linköping, Sweden, and Department of Clinical Pharmacology, County Council of Östergötland, Linköping, Sweden

Max Petzold, Professor

Akademistatistik – Centre for applied biostatistics, Sahlgrenska academy, University of Gothenburg, Department of Public Health and Community Medicine, Gothenburg, Sweden

Anders Carlsten, Associate professor

Nordic School of Public Health NHV, Gothenburg, Sweden, and Medical Products Agency, Uppsala, Sweden

Karolina Andersson Sundell, Associate professor

Nordic School of Public Health NHV, Gothenburg, Sweden, and Unit of Social Medicine, Department of Public Health and Community Medicine, Sahlgrenska Academy, University of Gothenburg, Gothenburg, Sweden

**Keywords**

adverse drug event

drug therapy

cost of illness

quality of life

survey

**Word count:** 3702

## ABSTRACT

### Objectives

To estimate the cost-of-illness (COI) of individuals with self-reported adverse drug events (ADE) from a societal perspective and to compare these estimates with the COI for individuals without ADE. Furthermore, to estimate the direct costs resulting from two ADE-categories, adverse drug reactions (ADR) and sub-therapeutic effects of medication therapy (STE).

### Design

Cross-sectional study

### Setting

The adult Swedish general population

### Participants

The survey was distributed to a random sample of 14,000 Swedish residents aged 18 years and older, of which 7,099 responded, 1,377 reported at least one ADE and 943 reported an ADR or STE.

### Main outcome measures

Societal COI, including direct and indirect costs, for individuals with at least one self-reported ADE, and the direct costs for prescription drugs and healthcare use resulting from self-reported ADRs and STEs, were estimated during 30 days using a bottom-up approach.

### Results

The economic burden for individuals with ADEs were (95% confidence interval) 442.7 to 599.8 international dollars (Int\$) of which direct costs were Int\$ 279.6 to 420.0 (67.1%), and indirect costs were Int\$ 143.0 to 199.8 (32.9%). The average COI was higher among those reporting ADEs compared to other respondents (COI: Int\$ 185.8 to 231.2). The COI of respondents reporting at least one ADR or STE was Int\$ 468.9 to 652.9. Direct costs resulting from ADRs or STEs were Int\$ 15.0 to 48.4. The reported resource use occurred both in hospitals and outside in primary care.

### Conclusions

Self-reported ADRs and STEs cause resource use both in hospitals and in primary care. Moreover, ADEs seem to be associated with high overall COI from a societal perspective, when comparing respondents with and without ADEs. There is a need to further examine this relationship, and to study the indirect costs resulting from ADEs.

## ARTICLE SUMMARY

### Article focus

- Adverse drug events have been reported not only to cause harm but also cause resource use from patients attending hospitals.
- Even though adverse drug events have been identified also outside hospitals, little is known about the associated resource use.
- Thus we conducted a population-based survey to identify the economic burden of diseases in individuals with adverse drug events and compare to those without adverse drug events.

### Key messages

- Our study suggests high overall costs of illness for individuals with self-reported adverse drug events, estimated to 8,871 million international dollars annually in Sweden when including those with adverse drug reactions, drug dependence, drug intoxications, sub-therapeutic effects of medication therapy and untreated indications.
- The estimated annual direct costs for prescribed drugs and healthcare use resulting from treatment of two of the adverse drug event categories, i.e. adverse drug reactions and sub-therapeutic effects of medication therapy, were 370 million international dollars.
- A large proportion (56%) of the healthcare resource use in respondents with adverse drug events occurred in the outpatient setting.

### Strengths and limitations of this study

- The main strength is the population-based design, including outpatient and inpatient healthcare, drug use, social services and transportation, lost productivity from both respondents and relatives, and health-related quality of life.
- The main limitation of the study is the response rate (50%), where some groups were somewhat underrepresented in the analysis.

## INTRODUCTION

Adverse drug events (ADEs), “an injury resulting from medical intervention related to a drug”,<sup>1</sup> have been identified as a public health problem that causes harm to patients and considerable resource use. According to previous research, 5-6 % of hospitalizations are drug-related,<sup>2,3</sup> and hospitalized patients experiencing adverse drug effects cause additional hospital costs of USD 2284-5640 per patient (in 2000 values).<sup>4</sup> Little is known about the corresponding costs outside hospitals,<sup>4</sup> or the magnitude of the problem in the general public, although patient-reported adverse drug reactions (ADR) have been reported to affect 6% of the Swedish population.<sup>5</sup>

The cost-of-illness (COI) is the economic burden of disease or diseases to the society. The distribution of the cost items in the COI could be used to judge the financial relevance in relation to other public health problems, and for different actors in the healthcare system study the development of the associated resource use over time.<sup>6</sup> Information about COI could also be useful for developing future intervention studies to address ADEs and to retrieve the costs for modelling e.g. cost-effectiveness of drug use in the general public.

Thus, we conducted a population-based survey to study self-reported ADEs. In ADEs we included ADRs, sub-therapeutic effects of medication therapy (STE), drug dependence, drug intoxications and untreated indications. The aim of the current study was to estimate and compare the COI of individuals with and without self-reported ADEs, from a societal perspective. A secondary aim was to estimate the direct costs resulting from two ADE-categories, ADRs and STEs. Additional results for prevalence and preventability of self-reported ADEs are reported elsewhere.<sup>7</sup>

## METHODS

### Study design

We conducted a population-based observational retrospective COI study of self-reported ADEs. The COI was prevalence-based and measured from a societal perspective, including direct and indirect costs during the 30 days study period. Costs were measured using a bottom-up approach using unit costs for resource use. Intangibles were approximated using health-related quality of life.

### Participants and data collection

A random sample of 14,000 Swedish residents aged 18 years or older was identified by Statistics Sweden from the Swedish adult population (7,382,226 individuals) on January 1<sup>st</sup> 2010. The sample size was calculated by assuming a one-month prevalence of 6.4% for ADRs in Sweden based on a previous study,<sup>5</sup> a preventable proportion of approximately 10%,<sup>8,9</sup> a 60% response rate,<sup>5</sup> and a maximum width of  $\pm 0.3\%$  for the 95% confidence interval of the preventable proportion. The estimated sample size (7,013) was doubled to enable analyses of predictors and costs. The cross sectional postal survey was sent in the first week of October 2010. Statistics Sweden distributed the surveys and collected the responses. The envelope contained a letter with information relevant for the informed consent, the questionnaire, and a prepaid envelope for returning the questionnaire. Three reminders were sent, one postcard and two with questionnaires. Data collection was closed February 1<sup>st</sup> 2011.

The questionnaire encompassed, for the past 30 days, questions on use of healthcare and social services; use of prescribed and over-the-counter medicines (OTC) as well as herbal remedies; experienced ADEs; and perceived preventability, consequences and use of healthcare due to ADRs and STEs. The questionnaire also included demographic and socioeconomic characteristics, and the EQ-5D questionnaire for health-related quality of life<sup>10</sup>. The questionnaire was piloted with

1  
2 healthcare professionals, individuals from the general public and specific patient groups. All  
3  
4 reported ADEs were carefully examined and cross-examined to exclude responses not indicating a  
5  
6 suspected symptom or drug.  
7  
8  
9

10  
11 Data from the questionnaire was combined with register data by record linkage using each  
12  
13 respondent's unique personal identification number, by Statistics Sweden. The register data  
14  
15 included demographic and socioeconomic variables from the Longitudinal Integration Database for  
16  
17 Health Insurance and Labour Market Studies from Statistics Sweden; sick-leave and disability  
18  
19 pension from the Swedish Social Insurance Agency; as well as filled prescriptions from the Swedish  
20  
21 Prescribed Drug Register and hospitalisations from the Swedish Patient Register, the last two are  
22  
23 held by the National Board of Health and Welfare.  
24  
25  
26  
27

### 28 **Direct costs**

29  
30 Direct costs included used resources: i.e. costs resulting from prescription drugs, healthcare, social  
31  
32 services and transportation. Direct costs resulting from ADRs or STEs included the costs for  
33  
34 prescription drugs and healthcare use caused by either ADRs or STEs.  
35  
36  
37  
38

39  
40 Dispensed prescription medicines and associated costs were retrieved from the Swedish Prescribed  
41  
42 Drug Register, National Board of Health and Welfare. Costs included both patient co-payments and  
43  
44 expenses for medicines, and costs paid by the reimbursement scheme. The prescription drug cost  
45  
46 during the study period was the average cost per month calculated from the 2010 annual  
47  
48 prescription medicine cost per respondent. Costs of medicine use resulting from ADRs or STEs  
49  
50 were the cost of any medicine reported in the survey for treating an ADR or STE and dispensed  
51  
52 during the study period according to the register.  
53  
54  
55  
56

57  
58 Healthcare use, both overall healthcare use and encounters resulting from ADRs or STEs, were  
59  
60

1  
2 retrieved from the questionnaire. Results from pre-specified questions and from free text were  
3  
4 categorized into: phone calls, nurse visits, outpatient physician visits, home healthcare, specialist  
5  
6 physician and emergency department visits, visits to other healthcare personnel in somatic care,  
7  
8 psychiatrist visits, visits to other healthcare personnel in psychiatric care, and hospitalizations.  
9  
10 Encounters for healthcare use of relatives, and respondent's donations of blood or tissues, were not  
11  
12 included in respondents' healthcare use. Unit costs of healthcare services were based on national  
13  
14 statistics on healthcare use and costs.<sup>11</sup> A visit to other healthcare personnel than physicians was  
15  
16 weighted as 40% of the cost of a physician visit. Phone calls were weighted as 1/3 of the cost of  
17  
18 visiting a nurse, and home healthcare as 2 times the cost of a nurse visit. Costs paid by the patient  
19  
20 were not included in the healthcare costs (2.3% of the proceeds to the healthcare producers<sup>11</sup>).  
21  
22  
23  
24  
25

26 Costs for social services included nursing home stay and home-help services reported in the  
27  
28 questionnaire. Transportation costs included reported transportation for the disabled and other  
29  
30 transportation for healthcare encounters, identified from the questionnaire. Costs for overall use of  
31  
32 social services and transportation were based on national statistics.<sup>12-14</sup>  
33  
34  
35  
36

### 37 **Indirect costs**

38  
39 Indirect costs included costs resulting from lost productivity for the respondent due to short-term  
40  
41 morbidity (sick-leave) and of relatives to the respondents' due to informal care.<sup>6</sup> Because of the  
42  
43 study design, it was not possible to identify deaths during the study period, and there were no  
44  
45 respondents initiating disability pension during the study period, therefore no future indirect costs  
46  
47 were estimated.<sup>15</sup> In addition, productivity loss due to reported long-term sick-leave (among those  
48  
49 <70 years) and disability pension (among those <65 years) was calculated. Lost productivity was  
50  
51 identified from the questionnaire. Costs for lost productivity were measured with the human capital  
52  
53 approach,<sup>6</sup> using national wages statistics and social security contributions.<sup>16,17</sup>  
54  
55  
56  
57  
58  
59  
60



### Additional resource use and intangibles

Visits to dental care and pharmacies, and lost leisure time, were reported descriptively. In addition to the estimated costs for healthcare and drug use, resource use resulting from ADRs and STEs was reported descriptively; including changes to drug therapy not identified as a dispensed medicine in the register during the study period, days of lost leisure time, patients' sick-leave and relatives' informal care. Intangible costs were omitted in the cost analysis, but pain and suffering was approximated by the respondents' health-related quality of life using EQ-5D-5L and the UK value sets.<sup>18,19</sup>

### Analyses

Respondents' characteristics were compared to the non-respondents, and compared based on ADE status (table 1), using register data for: age (young adults age 18-34, middle aged 35-64 years old, or individuals above the Swedish retirement age  $\geq 65$  years old), country of birth (Sweden or other than Sweden), educational level (mandatory education, intermediate education, i.e. high school and up to two years of university education, or high education, i.e. more than two years of university education), income during 2009, marital status, and sex. Main occupation was interpreted from survey responses for occupations, age and income data during 2009. Differences in characteristics were tested for statistical significance (at  $p < 0.05$ ), for respondents with or without ADEs, using chi square tests.

**Table 1. Description of the study population and comparison with non-respondents.**

|                                                       | <b>Respondents reporting ADE</b> | <b>Respondents not reporting ADE</b> | <b>All respondents</b> | <b>Non-respondents</b> |
|-------------------------------------------------------|----------------------------------|--------------------------------------|------------------------|------------------------|
|                                                       | Total = 1,377<br>N (%)           | Total = 5,722<br>N (%)               | Total = 7,099<br>N (%) | Total = 6,832<br>N (%) |
| <b>Age<sup>#</sup></b>                                |                                  |                                      |                        |                        |
| 18 – 34 years                                         | 294(21.4)                        | 1036(18.1)                           | 1330(18.7)             | 2328(34.1)             |
| 35 – 64 years                                         | 675(49.0)                        | 2935(51.3)                           | 3610(50.9)             | 3357(49.1)             |
| 65 – years                                            | 408(29.6)                        | 1751(30.6)                           | 2159(30.4)             | 1147(16.8)             |
| <b>Sex<sup>#</sup></b>                                |                                  |                                      |                        |                        |
| Men                                                   | 528(38.3)                        | 2732(47.7)                           | 3260(45.9)             | 3715(54.4)             |
| Women                                                 | 849(61.7)                        | 2990(52.3)                           | 3839(54.1)             | 3117(45.6)             |
| <b>Country of birth</b>                               |                                  |                                      |                        |                        |
| Sweden                                                | 1218 (88.5)                      | 1276 (92.7)                          | 6280(88.5)             | 5328(78.0)             |
| Other than Sweden                                     | 159 (11.5)                       | 101 (7.3)                            | 819(11.5)              | 1504(22.0)             |
| <b>Marital status</b>                                 |                                  |                                      |                        |                        |
| Single                                                | 457(33.2)                        | 1774(31.0)                           | 2231(31.4)             | 3226(47.2)             |
| Married or registered partnership                     | 633(46.0)                        | 2872(50.2)                           | 3505(49.4)             | 2424(35.5)             |
| Divorced                                              | 188(13.7)                        | 681(11.9)                            | 869(12.2)              | 802(11.7)              |
| Widowed                                               | 99(7.2)                          | 395(6.9)                             | 494(7.0)               | 380(5.6)               |
| <b>Education<sup>**</sup></b>                         |                                  |                                      |                        |                        |
| Mandatory education                                   | 240(17.6)                        | 1144(20.1)                           | 1499(21.1)             | 1804(26.4)             |
| Intermediate education                                | 655(48.0)                        | 2840(49.9)                           | 3438(48.4)             | 3483(51.0)             |
| High education                                        | 471(34.5)                        | 1706(30.0)                           | 2115(29.8)             | 1342(19.6)             |
| <b>Main occupation<sup>#†</sup></b>                   |                                  |                                      |                        |                        |
| Employee                                              | 584(43.0)                        | 2783(49.0)                           | 3367(47.8)             | NA                     |
| Company owner                                         | 58(4.3)                          | 351(6.2)                             | 409(5.8)               | NA                     |
| Student                                               | 81(6.0)                          | 290(5.1)                             | 371(5.3)               | NA                     |
| Retired                                               | 391(28.8)                        | 1697(29.9)                           | 2088(29.7)             | NA                     |
| On long-term sickness absence or disability pensioner | 131(9.7)                         | 202(3.6)                             | 333(4.7)               | NA                     |
| Other                                                 | 112(8.3)                         | 359(6.3)                             | 471(6.7)               | NA                     |
| <b>Income in 2009<sup>#</sup></b>                     |                                  |                                      |                        |                        |
| Int\$ ≤ 13,848                                        | 322(23.4)                        | 1046(18.3)                           | 1368(19.3)             | 2248(32.9)             |
| Int\$ 13,848-22,490                                   | 299(21.7)                        | 1162(20.3)                           | 1461(20.6)             | 1267(18.5)             |
| Int\$ 22,490-30,245                                   | 290(21.1)                        | 1192(20.8)                           | 1482(20.9)             | 1279(18.7)             |
| Int\$ 30,245-39,661                                   | 259(18.8)                        | 1235(21.6)                           | 1494(21.0)             | 1109(16.2)             |
| Int\$ 39,662 ≥                                        | 207(15.0)                        | 1087(19.0)                           | 1294(18.2)             | 929(13.6)              |

Resource use quantities, percentages and costs are rounded.

<sup>#</sup> Statistically significant difference between respondents with/without ADEs ( $p < 0.05$ ).

<sup>\*</sup> Educational level was missing for 47 of the respondents (0.7%), of which 11 were ADE cases, and 203 of the non-respondents (3.0%).

<sup>†</sup> Occupation was missing for 60 respondents, of which 20 were ADE cases.

Abbreviations: ADE = adverse drug events; Int\$ = international dollars; NA = not applicable.

1 All unit costs (table 2) were translated to international dollars (Int\$) using the 2010 purchasing  
2 power parity for gross domestic product (1 Int\$ = 9.026383 Swedish krona).<sup>20</sup> The Int\$ is a  
3 hypothetical currency with the same purchasing power as the United States dollar (US\$) in the  
4 Unites States of America, allowing for differences in price levels between countries.<sup>21</sup> Means and  
5 standard deviations for direct costs, indirect costs and COI were calculated for the 30 day period.  
6 Cost differences were tested for statistical significance (at  $p < 0.05$ ), for respondents with or without  
7 ADEs, and for ADE-respondents with or without at least one ADRs or STEs, using a two-tailed t-  
8 test with unequal variances. Cost differences and respondents' characteristics were tested for  
9 statistical significance (at  $p < 0.05$ ), for respondents with at least one ADRs or STEs, using one-way  
10 anova (for age categories) and a two-tailed t-test with unequal variances (for sex). Extrapolated  
11 annual direct costs, indirect costs and COI were calculated for the adult Swedish population (N =  
12 7,382,226) during 2010. All statistical analyses were made using the STATA 10.1 software.  
13  
14  
15  
16  
17  
18  
19  
20  
21  
22  
23  
24  
25  
26  
27  
28  
29  
30  
31  
32  
33  
34  
35  
36  
37  
38  
39  
40  
41  
42  
43  
44  
45  
46  
47  
48  
49  
50  
51  
52  
53  
54  
55  
56  
57  
58  
59  
60

**Table 2. Resource use in respondents with ADEs, and unit costs for the resources.**

|                                        | <b>Respondents<br/>reporting ADE and<br/>resource use</b> | <b>Quantity of<br/>resources used</b> | <b>Unit cost</b> |
|----------------------------------------|-----------------------------------------------------------|---------------------------------------|------------------|
|                                        | Total = 1377<br>N (% of total)                            | N or hours                            | (Int\$)          |
| <b>DIRECT COSTS:</b>                   |                                                           |                                       |                  |
| <b>Dispensed medicines<sup>#</sup></b> | 1218 (88.5)                                               | 26,436                                | -                |
| <b>Healthcare use:</b>                 |                                                           |                                       |                  |
| Phone calls                            | 106 (7.7)                                                 | 267                                   | 18.5             |
| Nurse visits                           | 93 (6.8)                                                  | 182                                   | 55.4             |
| Physicians visits                      | 92 (6.7)                                                  | 124                                   | 138.6            |
| Specialist physician and ED visits     | 91 (6.6)                                                  | 191                                   | 313.0            |
| Home healthcare                        | 6 (0.4)                                                   | 39                                    | 110.9            |
| Other somatic visits                   | 52 (3.8)                                                  | 159                                   | 55.4             |
| Psychiatrist visits                    | 4 (0.3)                                                   | 4                                     | 407.5            |
| Other psychiatric visits               | 49 (3.6)                                                  | 120                                   | 163.0            |
| Hospitalizations                       | 16 (1.2)                                                  | 20                                    | 5036.7           |
| <b>Social services:</b>                |                                                           |                                       |                  |
| Home-help services                     | 52 (3.8)                                                  | 1851                                  | 45.7             |
| Nursing homes                          | 19 (1.4)                                                  | 480                                   | 173.9            |
| <b>Transportation:</b>                 |                                                           |                                       |                  |
| Services for disabled                  | 38 (2.8)                                                  | 420                                   | 29.8             |
| Other transportation                   | 240 (17.4)                                                | 2793                                  | 2.5              |
| <b>INDIRECT COSTS:</b>                 |                                                           |                                       |                  |
| <b>Sick-leave (by age):</b>            |                                                           |                                       |                  |
| 18-24 years                            | 24 (23.1)                                                 | 1000                                  | 12.1*            |
| 25-34 years                            | 35 (18.4)                                                 | 1690                                  | 15.7*            |
| 35-44 years                            | 36 (19.1)                                                 | 1852                                  | 18.2*            |
| 45-54 years                            | 29 (13.0)                                                 | 1186                                  | 18.5*            |
| 55+ years                              | 39 (5.8)                                                  | 2062                                  | 18.2*            |
| <b>Informal care</b>                   | 228 (16.6)                                                | 2871                                  | 17.2*            |

Resource use quantities, percentages and costs are rounded.

<sup>#</sup> Based on register data.

\* The unit cost indicated was the average wage per hour in each age group<sup>16</sup>, which was then multiplied by the general payroll tax. For citizens <26 years of age the general payroll tax was 15.49% and for citizens ≥26 years of age it was 31.42%.<sup>17</sup> For the informal care, the indicated unit cost was the average wage per hour, which was then multiplied by the general payroll tax for citizen's ≥26 years of age.

Abbreviations: ADE = adverse drug events; ED = emergency department; Int\$ = international dollars; N = number; NA = not applicable; Q = quartile.

## Sensitivity analyses

Sensitivity analyses were made based on available register data for hospitalizations and respondents' lost productivity from sick-leave. Moreover, an additional extrapolation to the annual COI in the Swedish population was made, under the assumption that all ADEs and resource use in the study population was reported by the respondents, thus assuming that non-respondents had no ADEs or resource use. Because of the skewed data, with resources corresponding to 80% of the direct costs for respondents with ADEs reported by 10% of these respondents (figure 1), a proposed sensitivity analysis based on interquartile range, in the research plan, was unachievable. Additional changes from the research plan were limited to how results were reported.

**Figure 1: Accumulated direct costs of individuals with self-reported ADEs, including the subgroup reporting ADRs or STEs.**

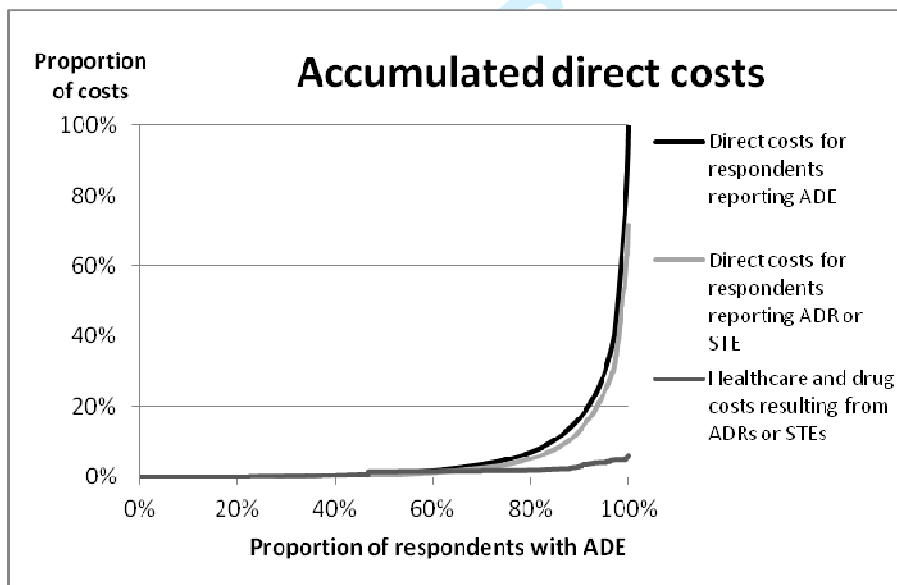

Abbreviations: ADE = adverse drug events; ADR = adverse drug reaction; STE = sub-therapeutic effect of medication therapy.

## RESULTS

A total of 7,099 questionnaires were collected (response rate 51 %). At least one ADE was reported by 1,377 (19.4%) respondents. Of these, 68.5% (943 respondents), reported at least one ADR or STE. There were statistically significant differences in age ( $p < 0.05$ ), sex ( $p < 0.001$ ), education ( $p < 0.01$ ), main occupation ( $p < 0.001$ ), and income ( $p < 0.001$ ), comparing respondents reporting at least one ADE compared to other respondents (table 1). Resource use for respondents with ADE is presented in table 2. Healthcare was attended by 239 (17.4%) of respondents reporting ADEs, of which 96 (40.2%) were hospitalized or visited a specialist physician (including psychiatrist visits). Among all respondents, 717 (10.1%) attended healthcare. Resource use among respondents with ADE included also outpatient care in hospitals with other healthcare personnel and primary care visits (e.g. nurse visits and physician visits). In addition, home-help services or a nursing home was attended by 51 (4.5%), of the 1,138 respondents with ADE that did not attend healthcare, while 164 (14.4%) reported informal care and 131 (11.5%) had stayed home from work.

The economic burden for individuals with ADEs were (mean  $\pm$  standard deviation, 95% confidence interval) Int\$ 521.2  $\pm$  1,485.7, Int\$ 442.7 to 599.8, of which direct costs were measured at Int\$ 349.8  $\pm$  1,328.7, Int\$ 279.6 to 420.0 (67.1%) and indirect costs were Int\$ 171.4  $\pm$  537.1, Int\$ 143.0 to 199.8 (32.9%) (table 3 and figure 2). The average COI was higher among those reporting ADEs compared to respondents without ADEs (COI: Int\$ 208.5  $\pm$  876.3, Int\$ 185.8 to 231.2) ( $p < 0.001$ ).

Productivity loss due to long-term sick-leave and disability pension increased the indirect costs by Int\$ 353.5  $\pm$  1,149.6 for those with ADEs and Int\$ 133.0  $\pm$  728.5 for other respondents ( $p < 0.001$ ).

The COI of respondents with ADR or STE was Int\$ 560.9  $\pm$  1,439.8, Int\$ 468.9 to 652.9.

Extrapolated to the Swedish population, the annual direct costs, indirect costs and COI of individuals with ADE were: Int\$ 5,953.4 million, Int\$ 2,917.5 million, and Int\$ 8,870.9 million, respectively (figure 3). Resource use among respondents with ADEs, or resulting from ADRs or

1  
2 STEs, occurred both in hospitals and outside of hospital in primary care. For respondents with  
3  
4 ADEs, 12% of the healthcare costs originated from primary care nurse or general practitioner visits,  
5  
6 while the remaining costs were equally distributed to other outpatient care (44%) and  
7  
8 hospitalisations (44%), while the proportions were: 15%, 44% and 41%, among all respondents.  
9  
10  
11  
12  
13  
14  
15  
16  
17  
18  
19  
20  
21  
22  
23  
24  
25  
26  
27  
28  
29  
30  
31  
32  
33  
34  
35  
36  
37  
38  
39  
40  
41  
42  
43  
44  
45  
46  
47  
48  
49  
50  
51  
52  
53  
54  
55  
56  
57  
58  
59  
60

**Table 3. Average cost-of-illness for patients with and without self-reported ADEs.**

|                                                       | <b>COI<br/>with ADE</b> | <b>COI<br/>without ADE</b> |
|-------------------------------------------------------|-------------------------|----------------------------|
|                                                       | N = 1377                | N = 5722                   |
|                                                       | average ± SD            | average ± SD               |
| Dispensed prescription medicines (Int\$) <sup>#</sup> | 48.6 ± 119.0            | 24.7 ± 103.3               |
| Healthcare use (Int\$) <sup>#</sup>                   | 164.9 ± 935.3           | 40.1 ± 360.7               |
| Social services (Int\$)                               | 122.1 ± 778.8           | 83.6 ± 673.5               |
| Transportation (Int\$) <sup>#</sup>                   | 14.3 ± 84.8             | 6.9 ± 67.2                 |
| <b>Total direct cost (Int\$)<sup>#</sup></b>          | <b>349.8 ± 1,328.7</b>  | <b>155.2 ± 805.3</b>       |
| Productivity loss, sick-leave (Int\$) <sup>#</sup>    | 124.4 ± 496.2           | 41.1 ± 272.8               |
| Informal care <sup>†</sup> (Int\$) <sup>#</sup>       | 47.1 ± 187.0            | 12.1 ± 89.3                |
| <b>Total indirect cost (Int\$)<sup>#</sup></b>        | <b>171.4 ± 537.1</b>    | <b>53.3 ± 290.9</b>        |
| <b>COST-OF-ILLNESS (Int\$)<sup>#</sup></b>            | <b>521.2 ± 1,485.7</b>  | <b>208.5 ± 876.3</b>       |
| <b>Other resource use:</b>                            |                         |                            |
| Over-the-counter drugs, number                        | 1.6 ± 1.5               | 1.0 ± 1.9                  |
| Natural remedies, number                              | 0.5 ± 1.0               | 0.3 ± 1.2                  |
| Lost leisure time, days                               | 3.7 ± 7.8               | 1.0 ± 4.2                  |
| Prevalent disability pension, n (%)                   | 135 (9.8)               | 242 (4.2)                  |
| EQ-5D™ index value                                    | 0.71 ± 0.22             | 0.84 ± 0.18                |
| Self-rated health by EQ-VAS                           | 69.8 ± 20.7             | 81.2 ± 16.9                |

Resource use quantities, percentages and costs are rounded.

<sup>#</sup> Statistically significant cost difference between respondents with/without ADEs (p<0.05).

<sup>†</sup> Of the 546 respondents reporting informal care, 56 respondents were excluded from the analyses since the amount of care (days and hours) was not reported.

Abbreviations: ADE = adverse drug events; EQ-5D™ = The EuroQol Group's five dimension health state questionnaire with five levels of severity; EQ-VAS = The EuroQol Group's visual analogue scale; Int\$ = international dollars; N = population size; SD = standard deviation.



Figure 2: The average monthly cost-of-illness of respondents based on reported ADE-status and healthcare attendance, divided into direct and indirect costs.

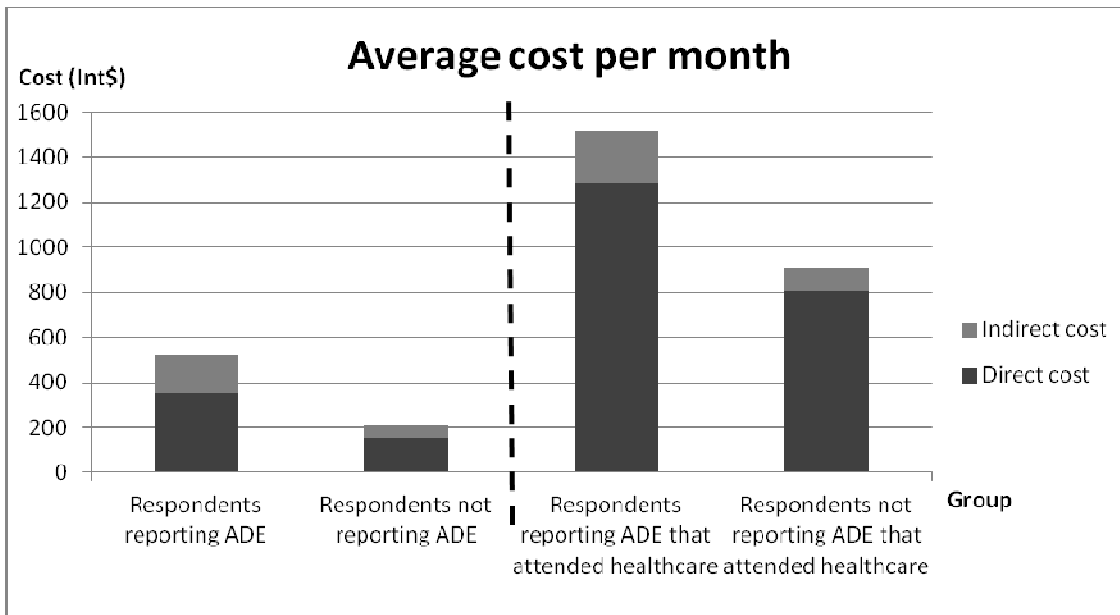

Abbreviations: ADE = adverse drug events; Int\$ = international dollars.

Figure 3: The annual cost-of-illness during 2010, extrapolated to the Swedish adult population, divided into direct and indirect costs.

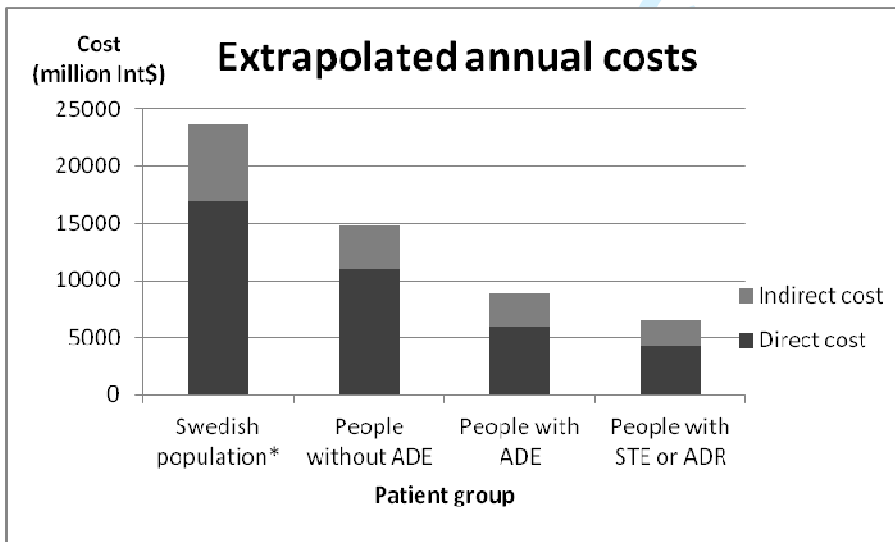

\* Summary measure for all individuals with and without ADEs.

Abbreviations: ADE = adverse drug events; Int\$ = international dollars.

Among all respondents with at least one ADR or STE, the average direct costs resulting from ADRs and STEs were Int\$ 31.7 ± 8.5, Int\$ 15.0 to 48.4. The resulting costs correspond to 8.7% of the direct costs and 12.5% of the costs of prescription drugs and healthcare use for those with ADRs or STEs. The average direct costs resulting from ADRs were Int\$ 0.5 ± 4.1 for prescription drugs and Int\$ 17.3 ± 159.0 for healthcare use, for those with ADRs. For STEs the average direct costs were Int\$ 1.4 ± 8.7 and Int\$ 33.9 ± 281.2, respectively. Extrapolated to the Swedish population, the annual direct costs resulting from ADRs or STEs were Int\$ 370.1 million. There were no statistically significant differences in COI for respondents with ADRs or STEs, or direct costs resulting from the ADRs or STEs, by age or sex (table 4).

**Table 4. Distribution of costs among respondents with self-reported ADRs or STEs\*, including cost-of-illness (all-cause morbidity) and direct costs resulting from self-reported ADRs or STEs.**

|                                                                             | Respondents<br>with ADR or STE<br>N (%) | Average cost-of-illness<br>for respondents<br>with ADR or STE<br>average ± SD, Int\$ | Direct cost<br>resulting from the<br>ADRs or STEs*<br>average ± SD, Int\$ |
|-----------------------------------------------------------------------------|-----------------------------------------|--------------------------------------------------------------------------------------|---------------------------------------------------------------------------|
| <b>Total resource use among the respondents with ADRs or STEs (N = 943)</b> |                                         |                                                                                      |                                                                           |
| Cost-of-illness                                                             | -                                       | 560.9 ± 1,439.8                                                                      | NA                                                                        |
| Direct costs                                                                | -                                       | (365.6 ± 1,279.4)                                                                    | NA                                                                        |
| Indirect costs                                                              | -                                       | (195.3 ± 564.7)                                                                      | NA                                                                        |
| <b>Age</b>                                                                  |                                         |                                                                                      |                                                                           |
| 18 – 34 years                                                               | 209 (22.2)                              | 556.5 ± 1,580.8                                                                      | 31.4 ± 241.7                                                              |
| 35 – 64 years                                                               | 473 (50.2)                              | 511.5 ± 1,154.4                                                                      | 41.5 ± 326.9                                                              |
| 65 – years                                                                  | 261 (27.7)                              | 653.9 ± 1,754.8                                                                      | 14.3 ± 77.3                                                               |
| <b>Sex</b>                                                                  |                                         |                                                                                      |                                                                           |
| Men                                                                         | 346 (36.7)                              | 486.4 ± 1,182.8                                                                      | 32.1 ± 232.4                                                              |
| Women                                                                       | 597 (63.3)                              | 604.0 ± 1,568.9                                                                      | 31.5 ± 276.7                                                              |
| <b>Type of ADE<sup>†</sup></b>                                              |                                         |                                                                                      |                                                                           |
| ADR                                                                         | 554 (58.7)                              | 659.0 ± 1,613.6                                                                      | 36.6 ± 290.8                                                              |
| STE                                                                         | 539 (57.2)                              | 566.0 ± 1,446.1                                                                      | 47.5 ± 335.5                                                              |
| <b>Self-reported preventability<sup>‡</sup></b>                             |                                         |                                                                                      |                                                                           |
| Preventable <sup>‡</sup>                                                    | 207 (22.0)                              | 720.9 ± 1,901.3                                                                      | 57.1 ± 343.7                                                              |
| Non-preventable                                                             | 736 (78.0)                              | 515.9 ± 1,278.4                                                                      | 24.6 ± 232.6                                                              |

Percentages and costs are rounded.

# Include persons with at least one self-reported ADR or STE.

\* Include resource use reported for both ADRs and STEs.

† Categories overlap, both includes persons with at least one self-reported ADR or STE respectively.

‡ Includes persons with at least one preventable self-reported ADR or STE.

Abbreviations: ADR = adverse drug reaction; Int\$ = international dollars; N = subgroup sample size; NA = not applicable; STE = sub-therapeutic effect of medication therapy.

Additional resource use attributed to ADRs by 554 respondents, reported during the 30 days study period, included: 90 medication changes not identified in the register, 1,448 days of lost leisure time (n = 117), 529 days of sick-leave (n = 61), and 600 days with informal care (n = 49). For STEs, additional resource use among the 539 respondents included: 116 medication changes, 2,510 days of lost leisure time (n = 187), 857 days of sick-leave (n = 88), and 1,171 days with informal care (n = 92). The health-related quality of life scores were significantly lower for respondents with ADEs compared to other respondents (figure 4): the EQ-5D™ summary estimates were  $0.84 \pm 0.18$  vs.  $0.71 \pm 0.22$  ( $p < 0.001$ ), and results from the visual analogue scale were  $69.79 \pm 20.69$  vs.  $81.17 \pm 16.94$  ( $p < 0.001$ ).

**Figure 4: Dimensions of health-related quality of life, health profile results from the EQ-5D™ instrument, categorized based on reported ADE-status.**

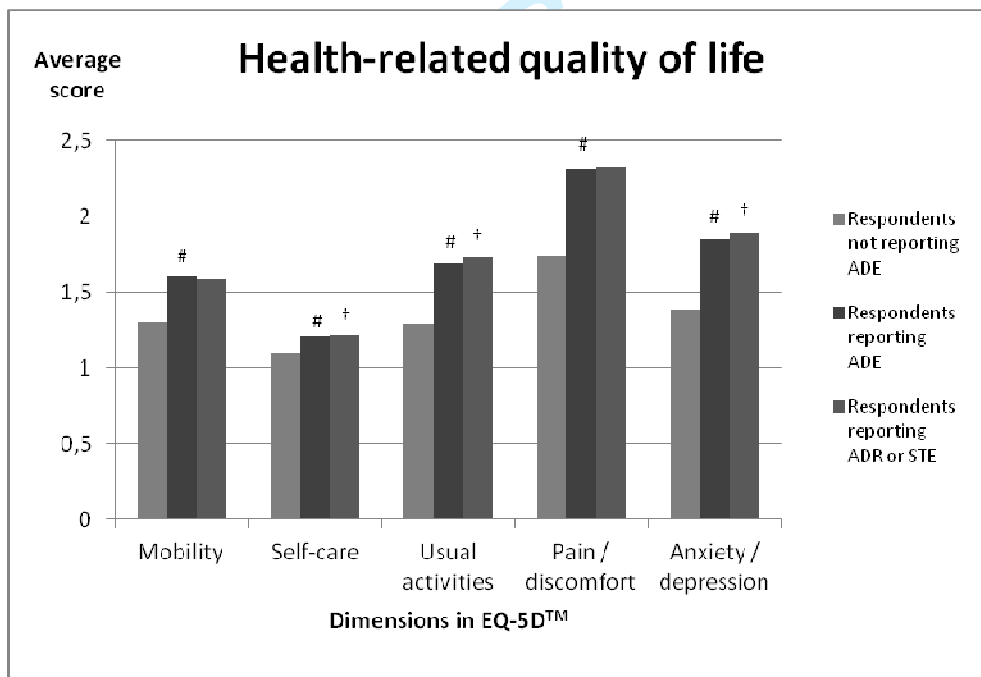

<sup>#</sup> Statistically significant difference between respondents with/without ADEs ( $p < 0.05$ ).

<sup>†</sup> Statistically significant difference between respondents with at least one ADR or STE compared to other respondents with ADEs ( $p < 0.05$ ).

Abbreviations: ADE = adverse drug events; ADR = adverse drug reaction; EQ-5D™ = The EuroQol Group's five dimension health state questionnaire with five levels of severity; STE = sub-therapeutic effect of medication therapy.

## Sensitivity analyses

The hospitalization rate reported in the survey (19 respondents reported 24 hospitalizations during the study period) was compared to the hospitalization rate identified from register data: 85 respondents had 101 hospitalizations covering a total of 365 days during the 5 weeks before answering the survey. Thus the sensitivity of the reporting of hospitalizations in the questionnaire was 59% and the specificity was 99% compared to register data. Among the 85 respondents, 24 hospitalisations lasted only one day or night, 10 hospitalisations occurred less than one week before the respondent's questionnaire was registered at Statistics Sweden, and 7 hospitalisations identified from the register were duplicate registrations based on transfers between hospitals or departments. For sick-leave, the sensitivity was 12% and the specificity was 99%, compared to register data, with 55 persons identified from both the register and the questionnaire. Of the 70 respondents identified from the register but not from the questionnaire, 25 reported to be on long-term sickness absence, seeking a job or on parental leave, 45 persons had not reported the sick-leave identified in the register. Of those 390 persons reporting sick-leave that were not identified in the register, 306 reported sick-leave of less than 2 weeks (which in Sweden is paid by the employer and is not registered), 7 had disability pension and the remaining 77 persons did not receive sickness benefit for their absence. Additional deviations were not possible to explain using available data.

Assuming that all ADEs and resource use in the study population was reported by our respondents, resulted in an annual COI of individuals with ADEs in the Swedish population Int\$ 746 million (direct costs: Int\$ 501 million).

## DISCUSSION

In this study, the societal COI of 1,377 individuals with self-reported ADEs was Int\$ 717,750.4 and the direct costs resulting from self-reported ADRs and STEs in 943 individuals was Int\$ 29,935.9. Thus, the extrapolated annual direct costs in Sweden resulting from ADRs and STEs, was Int\$ 370 million in 2010. Our results suggest that ADEs cause costs also outside hospitals, and for patients not attending hospitals. Thus, studies limited to drug-related admission will underestimate the economic impact in society. We have also found an association between the occurrence of ADEs and high overall COI that needs further analyzing in future studies.

The strengths of this study include a large number of respondents. However, certain groups were underrepresented among respondents, e.g. young adults, men, and those born in another country than Sweden. It is possible that the decision to respond is associated with health status, with either severely ill patients or healthy citizens being less prone to respond. Therefore we report a minimum estimation of the extrapolated annual COI for individuals with ADEs in the Swedish general public, assuming the non-respondents had no ADEs or resource use; thus were healthier than the respondents. This resulted in healthcare costs far below what was expected if compared to the annual healthcare expenditure in Sweden,<sup>22</sup> and even comparing our main analysis of extrapolated direct costs for the population, suggest that much resource use was unaccounted for in our analyses, thus we underestimate rather than overestimate the economic impact of ADEs. Moreover, previous research suggests the bias is mainly towards survey respondents being healthier than those not responding.<sup>23</sup> Other causes for incorrect estimation of the costs for ADEs in our study were the limitation to ADE status and used resources reported by the respondents. Responses were carefully examined to exclude responses not indicating a suspected symptom or drug, there may be symptoms reported that were e.g. resulting from the underlying disease rather than the drug use, and other relevant symptoms may not have been perceived related to the drug use by the respondent or

1 not being included in the five ADE categories included in the questionnaire. Still, previous research  
2 has shown that there is little overlap between ADEs reported by patients and by physicians,<sup>24</sup> thus  
3 we may underestimate the prevalence and resulting resource use of ADEs. The sensitivity analyses  
4 included comparing the resource use to what was reported in registers, only data for hospitalizations  
5 and sick-leave were available in national registers, which also indicated an underreporting rather  
6 than overestimating the resource use. Yet our main cause for underestimating the COI should be the  
7 limitation of indirect costs to short-term sick-leave and informal care. In a recent study of the total  
8 COI in Sweden, short-term sickness represented approximately 30% of the indirect costs and 17%  
9 of the COI.<sup>25</sup> Lost wages and household production has been reported to cause 47% of the total  
10 costs in patients discharged from hospital with adverse events (of which ADEs corresponded to  
11 32% of all costs).<sup>26</sup> Our design (time frame and data collection method) did not allow estimation of  
12 indirect costs from disability pension and mortality, thus underestimating the economic impact of  
13 ADEs.  
14  
15  
16  
17  
18  
19  
20  
21  
22  
23  
24  
25  
26  
27  
28  
29  
30  
31  
32

33 Our estimated one-month prevalence of ADRs of 7.8% was similar to the 2-week prevalence (6.4%)  
34 identified in a previous survey in the Swedish general public.<sup>5</sup> In our study, less than one fifth of  
35 respondents with ADEs attended healthcare during the study period, and on fifth of those with  
36 ADRs or STEs reported drug-related healthcare contacts. A previous study has reported that three  
37 quarters of elderly participants experiencing ADRs contacted a physician and 5% were also  
38 hospitalized due to the ADR during a one year study period,<sup>27</sup> but the disparity may depend on the  
39 length of the study period and the age of respondents. Our average direct costs resulting from ADRs  
40 (Int\$ 37) were, as expected, low compared to previous estimates of approximately Euro 2,800 for  
41 ADRs in patients attending hospitals.<sup>28</sup> Though, the small proportion of respondents reporting  
42 healthcare contacts due to their ADR or STE (with no respondent reporting hospitalization due to an  
43 ADR or STE), and the short study period, makes direct comparisons impossible. Our estimated  
44 average direct cost for respondents with ADEs that attended healthcare during the study period (Int\$  
45  
46  
47  
48  
49  
50  
51  
52  
53  
54  
55  
56  
57  
58  
59  
60

1  
2  
3  
4  
5  
6  
7  
8  
9  
10  
11  
12  
13  
14  
15  
16  
17  
18  
19  
20  
21  
22  
23  
24  
25  
26  
27  
28  
29  
30  
31  
32  
33  
34  
35  
36  
37  
38  
39  
40  
41  
42  
43  
44  
45  
46  
47  
48  
49  
50  
51  
52  
53  
54  
55  
56  
57  
58  
59  
60

1,283) was similar to the attributable charges previously reported for ADEs identified after a visit to ambulatory care: US\$ 926 (2006 value).<sup>29</sup> Our extrapolated annual direct costs for individuals with ADEs (Int\$ 5,953.4 million) equals 17% of the total healthcare expenditures in Sweden during 2010 (Int\$ 35,257.8 million).<sup>22</sup> The extrapolated direct costs resulting from ADRs and STEs (Int\$ 370 million) represented a small part of the total healthcare costs, but was comparable to the excess hospital costs estimated for obesity in Sweden (US\$ 269 million in 2003).<sup>30</sup>

According to our results, there is a need for increased awareness about the impact of ADEs which does not result in the patient attending hospital. Moreover, additional efforts are needed to handle STE, which seem to be just as common and costly as ADRs. Since ADE status seems to be associated with high overall COI and incur healthcare resource use, many of these patients should be possible to identify in the healthcare system, even when the ADE in itself may not be the main cause of resource use.

Future research is needed to further analyze the relationship between ADEs and the associated resource use, to identify when and how the resource use occurs, and the true relationship between ADEs and the overall COI. There is also a need to examine the indirect costs resulting from ADEs, since our study could only briefly describe sick-leave and informal care resulting from ADRs and STEs. Moreover, the resource use identified from patients self-reports should be contrasted by population-based estimates of ADEs and the associated resource use identified by healthcare professionals, to enable further analyses of the clinical and economic impact of ADEs, identify high-risk patients, and study the causes and consequences of ADEs in the general public.

## CONCLUSIONS

To our knowledge, this is the first study estimating the COI of ADEs in the general public. Our results show that self-reported ADRs and STEs cause resource use both in hospitals and primary care. Moreover, ADEs seem to be associated with high overall COI from the societal perspective, when comparing respondents with and without ADEs. There is a need to further examine the relationships between ADEs and associated resource use and overall COI, respectively, and to study the indirect costs resulting from ADEs.



## ACKNOWLEDGEMENT

We wish to thank the survey respondents for taking the time to share their experience with us.

## ETHICS APPROVAL

The study received ethical approval from the Regional Ethical Review Board in Gothenburg (approval reference number: 238-10), in 2010.

The questionnaire cover letter included information about how and why the research was conducted, contact information, and how to withdraw. Informed consent was implied by returning the questionnaire. The questionnaire and the cover letter were developed in accordance with the declaration of Helsinki.

The ethical approval did not include an approval to share individual responses or register data publicly.

## COMPETING INTEREST DECLARATION

All authors have completed the Unified Competing Interest form at [www.icmje.org/coi\\_disclosure.pdf](http://www.icmje.org/coi_disclosure.pdf) (available on request from the corresponding author) and declare: all authors had financial support from National Corporation of Swedish Pharmacies (Apoteket AB) for the submitted work; no financial relationships with any organisations that might have an interest in the submitted work in the previous 3 years; no other relationships or activities that could appear to have influenced the submitted work.

The opinions or assertions contained herein are the private views of the authors, and are not to be construed as official or as reflecting the views of the Medical Products Agency.

## FUNDING

The research is part of the DRUMS project (Drug-related morbidity and mortality in Sweden: prevalence, preventability and costs) funded by an unrestricted grant from the National Corporation of Swedish Pharmacies (Apoteket AB). The study sponsor had no role in the study design; in the collection, analysis, and interpretation of data; in the writing of the article; and in the decision to submit it for publication. The researchers work was independent from the sponsor. All authors, external and internal, had full access to all of the data (including statistical reports and tables) in the study and can take responsibility for the integrity of the data and the accuracy of the data analysis.

## DETAILS OF CONTRIBUTORS

KAS was the principal investigator. HG did the analyses and drafted the manuscript. AC, AKJ, CR, HG, KAS and MP contributed to the study design and development of the questionnaire, data

1 analysis, and interpretation of the results and commented on the draft. Also, Katja M Hakkarainen,  
2 Staffan Hägg, Johnny Pettersson and Annika Yeiter contributed to the study design, and the  
3 development and piloting of the questionnaire. Tatiana Zverkova Sandström contributed to the data  
4 analysis. All authors had full access to all data. HG is the guarantor of the study.  
5  
6  
7

## 8 LICENCE FOR PUBLICATION 9

10  
11 The Corresponding Author has the right to grant on behalf of all authors and does grant on behalf of  
12 all authors, an exclusive licence (or non-exclusive for UK Crown Employees) on a worldwide basis  
13 to the BMJ Publishing Group Ltd, and its Licensees to permit this article (if accepted) to be  
14 published in BMJ open and any other BMJ PGL products and to exploit all subsidiary rights, as set  
15 out in our licence.  
16  
17  
18  
19  
20  
21  
22  
23  
24  
25  
26  
27  
28  
29  
30  
31  
32  
33  
34  
35  
36  
37  
38  
39  
40  
41  
42  
43  
44  
45  
46  
47  
48  
49  
50  
51  
52  
53  
54  
55  
56  
57  
58  
59  
60

**REFERENCES**

1. Bates DW, Boyle DL, Vander Vliet MB, et al. Relationship between medication errors and adverse drug events. *J Gen Intern Med* 1995;**10**:199-205. doi:10.1007/BF02600255.
2. Einarson TR. Drug-related hospital admissions. *Ann Pharmacother* 1993;**27**:832-840.
3. Krähenbühl-Melcher A, Schlienger R, Lampert M, et al. Drug-related problems in hospitals: a review of the recent literature. *Drug Saf* 2007;**30**:379-407.
4. Rodríguez-Monguió R, Otero MJ, Rovira J. Assessing the economic impact of adverse drug effects. *Pharmacoeconomics* 2003;**21**:623-650.
5. Isacson D, Johansson L, Bingefors K. Nationwide survey of subjectively reported adverse drug reactions in Sweden. *Ann Pharmacother* 2008;**42**:347-353. doi:10.1345/aph.1K488.
6. Segel JE editor. *Cost-of-Illness Studies - A Primer*. RTI-UNC Center of Excellence in Health Promotion Economics, 2006:1-39.
7. Hakkarainen KM, Andersson Sundell K, Petzold M, et al. Self-reported adverse drug events equally prevalent across age groups - a population-based survey in Sweden. Manuscript submitted for publication. .
8. Gandhi TK, Seger DL, Bates DW. Identifying drug safety issues: from research to practice. *Int J Qual Health Care* 2000;**12**:69-76. doi:10.1093/intqhc/12.1.69.
9. Gandhi TK, Weingart SN, Borus J, et al. Adverse drug events in ambulatory care. *N Engl J Med* 2003;**348**:1556-1564. doi:10.1056/NEJMsa020703.
10. EuroQol Group. EuroQol--a new facility for the measurement of health-related quality of life. The EuroQol Group. *Health Policy* 1990;**16**:199-208.
11. Swedish Association of Local Authorities and Regions editor. *Statistik om hälso- och sjukvård samt regional utveckling 2010*. Sveriges kommuner och landsting, Stockholm, 2011:1-216. ISBN: 978-91-7164-683-5. Swedish.
12. Swedish Association of Local Authorities and Regions editor. *Kostnad per brukare: jämförelser mellan kommuner inom omsorg om äldre och personer med funktionsnedsättning : utfall 2010*. Sveriges kommuner och landsting, Stockholm, 2011:39. ISBN: 978-91-7164-722-1. Swedish.

- 1  
2  
3  
4  
5  
6  
7  
8  
9  
10  
11  
12  
13  
14  
15  
16  
17  
18  
19  
20  
21  
22  
23  
24  
25  
26  
27  
28  
29  
30  
31  
32  
33  
34  
35  
36  
37  
38  
39  
40  
41  
42  
43  
44  
45  
46  
47  
48  
49  
50  
51  
52  
53  
54  
55  
56  
57  
58  
59  
60
13. Transport Analysis editor. Special transport service and inter-municipal transport service 2010. Trafikanalys, Stockholm, 2011. Report: 2011:16. Swedish.
14. Transport Analysis editor. Local and regional public transport 2010. Trafikanalys, Stockholm, 2011. Report: 2011:19. Swedish.
15. Lindgren B. Costs of illness in Sweden 1964-1975. Lund, Sweden: Lund University; 1981.
16. Statistics Sweden. Genomsnittlig grund- och månadslön samt kvinnors lön i procent av mäns lön efter sektor, yrke (SSYK), kön och ålder. År 2005-2010. Available at: <http://www.ssd.scb.se/databaser/makro/Visavar.asp?yp=tansss&xu=C9233001&omradekod=AM&huvudtabell=LonYrkeAlder4&omradetext=Arbetsmarknad&tabelltext=Genomsnittlig+grund%2D+och+m%2E+nadsl%2F6n+samst+kvinnors+l%2F6n+i+procent+av+m%2E+ns+l%2F6n+efter+sektor%2C+yrke+%28SSYK%29%2C+k%2F6n+och+%2E+lder%2E+%2C5r&preskat=O&prodid=AM0110&deltabell=&deltabellnamn=Genomsnittlig+grund%2D+och+m%2E+nadsl%2F6n+samst+kvinnors+l%2F6n+i+procent+av+m%2E+ns+l%2F6n+efter+sektor%2C+yrke+%28SSYK%29%2C+k%2F6n+och+%2E+lder%2E+%2C5r&inneha ll=Antal&starttid=2005&stopptid=2010&Fromwhere=M&lang=1&langdb=1>. Accessed 03/06, 2012. Swedish.
17. Statistics Sweden. Mer om Arbetskostnadsindex (AKI). Available at: [http://www.scb.se/Pages/Standard\\_23066.aspx](http://www.scb.se/Pages/Standard_23066.aspx). Accessed 11/26, 2012. Swedish.
18. Herdman M, Gudex C, Lloyd A, et al. Development and preliminary testing of the new five-level version of EQ-5D (EQ-5D-5L). Qual Life Res 2011;**20**:1727-1736. doi:10.1007/s11136-011-9903-x.
19. EuroQol Group. EQ-5D-5L Crosswalk Value Sets. 2012; Available at: <http://www.euroqol.org/about-eq-5d/valuation-of-eq-5d/eq-5d-5l-value-sets.html>. Accessed 11/26, 2012.
20. Organisation for economic co-operation and development. PPPs and exchange rates. Available at: <http://stats.oecd.org/Index.aspx?DataSetCode=CPL#>. Accessed 09/24, 2012.
21. Evans DB, Edejer TT, Adam T, et al. Methods to assess the costs and health effects of interventions for improving health in developing countries. BMJ 2005;**331**:1137-1140. doi:10.1136/bmj.331.7525.1137.

- 1  
2  
3  
4  
5  
6  
7  
8  
9  
10  
11  
12  
13  
14  
15  
16  
17  
18  
19  
20  
21  
22  
23  
24  
25  
26  
27  
28  
29  
30  
31  
32  
33  
34  
35  
36  
37  
38  
39  
40  
41  
42  
43  
44  
45  
46  
47  
48  
49  
50  
51  
52  
53  
54  
55  
56  
57  
58  
59  
60
22. Statistics Sweden. Svenska hälsoräkenskaper 2001-2010. Available at: [http://www.scb.se/Pages/ProductTables\\_231546.aspx](http://www.scb.se/Pages/ProductTables_231546.aspx). Accessed 06/28, 2012. Swedish.
23. Suominen S, Koskenvuo K, Sillanmaki L, et al. Non-response in a nationwide follow-up postal survey in Finland: a register-based mortality analysis of respondents and non-respondents of the Health and Social Support (HeSSup) Study. *BMJ Open* 2012;**2**:e000657. doi:10.1136/bmjopen-2011-000657.
24. Morimoto T, Gandhi TK, Seger AC, et al. Adverse drug events and medication errors: detection and classification methods. *Qual Saf Health Care* 2004;**13**:306-314. doi:10.1136/qhc.13.4.306.
25. Ramsberg J, Ekelund M. Stuprörstänkande gör samhällets kostnader för ohälsa onödigt höga. *Ekonomisk debatt* 2011;**39**:41-53. Swedish.
26. Thomas EJ, Studdert DM, Newhouse JP, et al. Costs of medical injuries in Utah and Colorado. *Inquiry* 1999;**36**:255-264.
27. Chrischilles EA, Segar ET, Wallace RB. Self-reported adverse drug reactions and related resource use. A study of community-dwelling persons 65 years of age and older. *Ann Intern Med* 1992;**117**:634-640.
28. Gautier S, Bachelet H, Bordet R, et al. The cost of adverse drug reactions. *Expert Opin Pharmacother* 2003;**4**:319-326. doi:10.1517/14656566.4.3.319.
29. Burton MM, Hope C, Murray MD, et al. The cost of adverse drug events in ambulatory care. *AMIA Annu Symp Proc* 2007:90-93.
30. Borg S, Persson U, Odegaard K, et al. Obesity, survival, and hospital costs-findings from a screening project in Sweden. *Value Health* 2005;**8**:562-571. doi:10.1111/j.1524-4733.2005.00048.x.

Population-based survey, research plan  
Hanna Gyllensten

2011-06-08

## Cost-of-Illness of patient-reported Adverse Drug Events - A population-based survey

Hanna Gyllensten, Clas Rehnberg, Anna K Jönsson, Max Petzold, Anders Carlsten, Karolina Andersson Sundell

### BACKGROUND

Patient-reported adverse drug reactions have been reported to affect 6% of the Swedish population (**Isacson**). According to previous research 5-6 % of hospitalizations are caused by adverse drug events (ADE) or reactions (ADR) (Einarson, 1993; Krähenbühl-Melcher, 2007). Hospitalized patients experiencing drug-related morbidity, has been suggested to cause additional hospital costs of USD 2284-5640 per patient (2000 values), but few studies have included indirect costs in the analysis or estimated the costs of drug-related morbidity outside of the hospital setting (Rodríguez-Monguió, 2003).

Cost-of-illness (COI) studies measure the economic burden of disease or diseases. An analysis of the societal COI includes direct and indirect costs. Direct costs generally includes resources used for treating the disease: e.g. costs resulting from hospitalizations, visits to health care professionals, prescription drug use, laboratory tests, nursing home care, rehabilitation. Indirect costs include costs resulting from lost productivity due to morbidity and mortality, as well as the lost productivity due to informal care. The cost of lost production can be measured using the human capital approach (Segel, 2005). Prevalence-based COI analyses include direct and indirect costs during the study period, and the discounted future costs resulting from permanent disability and mortality which occurs during the study period (Lindgren, 1981). The recommended annual discount rate varies between countries, but 3-3,5 % has been recommended, with a sensitivity analysis with discount rates of 0% to 5-6% (LFNAR 2003; NICE, 2008).

### AIMS AND OBJECTIVES

Primary objectives:

1. To estimate the COI of people with self-reported ADE, from the societal perspective.
2. To estimate the societal COI resulting from self-reported ADR and sub-therapeutic effects of medication therapy (ST) , from the societal perspective.

Secondary objectives:

- 1.1. To compare the COI of people with and without self-reported ADE, from the societal perspective.
- 2.1. To analyze differences in COI of self-reported ADR and STs according to type of drug-related morbidity and patient characteristics, from the societal perspective.

### METHODS / DESCRIPTION OF THE STUDY

#### Terminology within the study

1. The questionnaire includes questions about five types of drug-related morbidity: ADRs, STs, untreated indications, dependency and intoxication. In analyses comparing COI of patients with and without drug-related morbidity, respondents with any of the five types of drug-related morbidity will be included, which in the study will be named ADE.



Population-based survey, research plan  
Hanna Gyllensten

2011-06-08

2. Questions about health-care use resulting from drug-related morbidity include usage resulting from ADRs and STs. COI of patients with ADRs and STs will be used for comparisons with the COI resulting from ADRs and STs, and when analyzing differences in COI of self-reported ADRs and STs according to type of drug-related morbidity and patient characteristics.

### Study population

A cross sectional study of a random sample of 14 000 adults aged 18 years and over resident in Sweden on January 1<sup>st</sup> 2010.

### Definition of the primary outcomes

1. The primary outcome measure is the COI of respondents with at least one self-reported ADE, from the societal perspective.
2. The primary outcome measure is the COI resulting from self-reported ADR or ST, from the societal perspective.

### Data sources and measurement

A cross-sectional population-based postal questionnaire was sent to a random sample of 14 000 Swedish residents aged 18 years or older in the first week of October 2010. The questionnaire encompassed questions on demographic and socioeconomic characteristics, health-related quality of life, utilisation of health and social services, beliefs about medicines and perceived sensitivity to medicines, use of prescribed and over-the-counter medicines (OTCs) as well as herbal remedies, experienced ADEs, perceived preventability of ADRs and ST as well as consequences and utilisation of health care due to ADRs and ST. Utilisation of health care and social services, medicines and remedies and experienced ADEs and ADRs were all assessed during the past month.

Previously introduced and validated questionnaires on health-related quality of life (EQ-5D) (Burström, 2001; EuroQol, 1990) and beliefs about medicines (BMQ General including Sensitive Soma) (Horne, 1999) were used. For questions on demographic and socioeconomic characteristics, existing standardised questions developed by SCB are used. As no validated Swedish instruments on the use of medicines, experienced ADEs, perceived preventability of ADRs and STs or the utilisation of health services in Sweden exist, these questions were developed by the research group based on earlier studies (Isacson, 2008; Gandhi, 2003; Borgström, 2006).

Data from the questionnaire was complemented with register data by record linkage. Register data collected encompassed information on demographic and socioeconomic variables (such as income, education, country of birth, marital status and number of persons in the family), information on sick-leave and disability pension and information on filled prescriptions and hospitalisations in the preceding year.

### Costs

Unit costs of health-care services will be based on national statistics on health-care utilization and costs (SKL). The cost of home-help services and nursing homes will be identified from national statistics on community care (SKL). The unit cost of granted mobility services will be the average travel cost of transportation costs for the disabled (SIKA) and all other traveling related to health-care use will be applied the average cost of a bus trip (Trafä). Average income data for 2010, including social insurance contribution, will be used for

Population-based survey, research plan  
Hanna Gyllensten

2011-06-08

measuring the cost of productivity loss due to sick leave, and informal care (i.e. help with personal care and household from unpaid caregivers), during the study period (SCB).

The cost of dispensed prescription medicines will be retrieved from the Swedish Prescribed Drug Register, including both costs paid by the patient and reimbursement costs (Wettermark, 2007). Drug-utilization resulting from drug-related morbidity is the cost of the dispensed medicine (patient cost and reimbursement) while the total prescription drug costs during the study period will be estimated from the annual prescription drug cost per patient.

### Analysis

An analysis of attrition will be made by characterizing respondents based on socio-demographic variables and compare to the study sample and the Swedish population, according to: age, sex, marital status, disposable income 2009, foreign background, level of education, and employment status (table 1).

Societal COI will include direct costs (medical and non-medical), and indirect costs (non-medical). For each respondent the direct costs will be estimated by adding the costs of health-care services, community care, transportation, and dispensed prescription medicines. Indirect costs will be the lost productivity of patients due to sick leave, and of relatives caused by informal care. Costs will be calculated for each patient by multiplying the resource use by a corresponding unit cost.

Use of OTCs and herbal remedies, patients reporting lost leisure time, incident and prevalent disability pension during the study period, and health-related quality of life (HRQoL) results are reported descriptively (figure 3). Average HRQoL in patients with and without drug-related morbidity will be compared using t-test. Lost leisure time will be reported separately for patients not working (due to retirement or other causes) and patients in working age.

#### Primary outcome No 1:

The societal COI of respondents (including also costs resulting from other diseases than drug-related morbidity) will be estimated, including all direct and indirect costs reported by the patient. The societal COI of patients experiencing drug-related morbidity (table 2), and of all respondents will be reported (table 3), to allow comparison of the costs resulting of drug-related morbidity to the COI.

#### Primary outcome No 2:

The societal COI resulting from ADE will be estimated, including all direct and indirect costs resulting from ADE. Societal COI resulting from self-reported ADRs and STs will be presented. Societal COI of patients with self-reported ADRs and STs and societal COI resulting from self-reported ADRs and STs will be reported based on patient characteristics and information about the reported drug-related morbidity (table 4). The proportion of the societal COI resulting from ADRs and STs of the societal COI of patients with ADRs and STs will be reported in text.

Average direct, indirect and societal COI will be presented together with standard deviations. Extrapolation of annual costs for the Swedish population will be made, from societal COI of patients with self-reported ADEs and of societal COI resulting from self-reported ADRs and STs.



Population-based survey, research plan  
Hanna Gyllensten

2011-06-08

### Sensitivity analysis

A sensitivity analysis (table 2), of the societal COI of respondents reporting ADE, will be made varying the likelihood of separate cost items, using the interquartile range of survey results. Another analysis of the sensitivity of results will be made based on register data for: number and length of hospitalizations during the study period, days receiving sickness benefit, productivity loss estimated from income during 2009 (adjusted according to occupational status in 2010), using dispensed prescription medicines cost data from the month before questionnaire submission, and using the Washington panel approach (Tranmer, 2005) for estimating lost leisure time (including lost leisure time due to health care contacts only).

For peer review only

Population-based survey, research plan  
Hanna Gyllenstein

2011-06-08

## TABLES AND FIGURES

**Table 1. Description of the study population and analysis of attrition:**

|                                                      | Respondents reporting ADE | Respondents without ADE | All respondents | Non-respondents |
|------------------------------------------------------|---------------------------|-------------------------|-----------------|-----------------|
| Age                                                  |                           |                         |                 |                 |
| 18 – 34 years                                        |                           |                         |                 |                 |
| 35 – 64 years                                        |                           |                         |                 |                 |
| 65 – years                                           |                           |                         |                 |                 |
| Sex                                                  |                           |                         |                 |                 |
| Men                                                  |                           |                         |                 |                 |
| Women                                                |                           |                         |                 |                 |
| Background                                           |                           |                         |                 |                 |
| Foreign                                              |                           |                         |                 |                 |
| Swedish                                              |                           |                         |                 |                 |
| Marital status                                       |                           |                         |                 |                 |
| Single                                               |                           |                         |                 |                 |
| Cohabiting, married or registered partnership        |                           |                         |                 |                 |
| Divorced                                             |                           |                         |                 |                 |
| Widowed                                              |                           |                         |                 |                 |
| Education                                            |                           |                         |                 |                 |
| Low education                                        |                           |                         |                 |                 |
| Intermediate education                               |                           |                         |                 |                 |
| High education                                       |                           |                         |                 |                 |
| Occupation                                           |                           |                         |                 |                 |
| Employee                                             |                           |                         |                 | NA              |
| Company owner                                        |                           |                         |                 | NA              |
| Student                                              |                           |                         |                 | NA              |
| Retired                                              |                           |                         |                 | NA              |
| On longterm sickness absence or disability pensioner |                           |                         |                 | NA              |
| Other                                                |                           |                         |                 |                 |
| Disposable income in 2009                            |                           |                         |                 |                 |
| – 1 quartile                                         |                           |                         |                 |                 |
| 1 – 2 quartile                                       |                           |                         |                 |                 |
| 2 – 3 quartile                                       |                           |                         |                 |                 |
| 4 – quartile                                         |                           |                         |                 |                 |

Abbreviations: ADE = ADR, untreated indication, dependency, intoxications, or ST; NA = not applicable; ADR = adverse drug reaction; ST = sub-therapeutic effect of medication therapy.

Population-based survey, research plan  
Hanna Gyllenstein

2011-06-08

**Table 2. Societal COI in patients with ADR or ST, and sensitivity analysis of the estimate:**

|                                                        | Main results                      |                                          | Sensitivity analysis A* |                  | Sensitivity analysis B**   |                  |            |            |
|--------------------------------------------------------|-----------------------------------|------------------------------------------|-------------------------|------------------|----------------------------|------------------|------------|------------|
|                                                        | Patients with self-reported ADEs* | Quantity of resources used, days /visits | Unit cost (SEK)         | Total cost (SEK) | Quantity of resources used | Total cost (SEK) | Q1 N (SEK) | Q3 N (SEK) |
| Dispensed prescription medicines                       |                                   |                                          | -                       |                  | -                          |                  |            |            |
| Health-care use:                                       |                                   |                                          |                         |                  |                            |                  |            |            |
| Phone calls                                            |                                   |                                          |                         |                  |                            |                  |            |            |
| Nurse visits                                           |                                   |                                          |                         |                  |                            |                  |            |            |
| Physicians visits                                      |                                   |                                          |                         |                  |                            |                  |            |            |
| Emergency department visits                            |                                   |                                          |                         |                  |                            |                  |            |            |
| Home-health care                                       |                                   |                                          |                         |                  |                            |                  |            |            |
| Physiotherapist visits                                 |                                   |                                          |                         |                  |                            |                  |            |            |
| Occupational therapist visits                          |                                   |                                          |                         |                  |                            |                  |            |            |
| Specialist physician visits                            |                                   |                                          |                         |                  |                            |                  |            |            |
| Hospitalizations                                       |                                   |                                          |                         |                  |                            |                  |            |            |
| Social services:                                       |                                   |                                          |                         |                  | -                          | -                |            |            |
| Home-help services                                     |                                   |                                          |                         |                  |                            |                  |            |            |
| Nursing homes                                          |                                   |                                          |                         |                  |                            |                  |            |            |
| Transportation:                                        |                                   |                                          |                         |                  | -                          | -                |            |            |
| Proportion by transportation services for the disabled |                                   |                                          |                         |                  |                            |                  |            |            |
| Total direct cost                                      |                                   |                                          |                         |                  | -                          | -                |            |            |
| Productivity loss, sick leave                          |                                   |                                          |                         |                  |                            |                  |            |            |
| Informal care                                          |                                   |                                          |                         |                  |                            |                  |            |            |
| Total indirect cost                                    |                                   |                                          |                         |                  | -                          | -                |            |            |
| Societal cost-of-illness                               |                                   |                                          |                         |                  | -                          | -                |            |            |
| Other resource use:                                    |                                   |                                          |                         |                  |                            |                  |            |            |
| Lost leisure time (days)                               |                                   |                                          |                         |                  | -                          | -                |            |            |

\* Sensitivity analysis based on register data.

\*\* Sensitivity analysis based on the interquartile ranges (quartile 1 (Q1) and quartile 3 (Q3)) of answers in the questionnaire, with number of resources used (N) and the resulting cost (in SEK).

Abbreviations: ADE = ADR, untreated indication, dependency, intoxications, or ST; ADR = adverse drug reaction; ST = sub-therapeutic effect of medication therapy.

Population-based survey, research plan  
Hanna Gyllenstein

2011-06-08

**Table 3. Societal COI of patients with and without self-reported drug-related morbidity:**

|                                                       | COI without<br>ADE<br>(SEK) | COI with<br>ADE<br>(SEK) | COI with<br>ADR or<br>ST<br>(SEK) | COI from<br>ADR<br>(SEK) | COI from<br>ST<br>(SEK) |
|-------------------------------------------------------|-----------------------------|--------------------------|-----------------------------------|--------------------------|-------------------------|
| Dispensed prescription medicines                      |                             |                          |                                   |                          |                         |
| Health-care use                                       |                             |                          |                                   |                          |                         |
| Social services                                       |                             |                          |                                   |                          |                         |
| Transportation                                        |                             |                          |                                   |                          |                         |
| Total direct cost                                     |                             |                          |                                   |                          |                         |
| Productivity loss, sick leave                         |                             |                          |                                   |                          |                         |
| Informal care                                         |                             |                          |                                   |                          |                         |
| Total indirect cost                                   |                             |                          |                                   |                          |                         |
| Societal cost-of-illness                              |                             |                          |                                   |                          |                         |
| Other resource use:                                   |                             |                          |                                   |                          |                         |
| Over-the-counter drugs (N)                            |                             |                          |                                   | NA                       | NA                      |
| Natural remedies (N)                                  |                             |                          |                                   | NA                       | NA                      |
| Lost leisure time (days)                              |                             |                          |                                   | NA                       | NA                      |
| Incident disability pension (N)                       |                             |                          |                                   | NA                       | NA                      |
| Prevalent disability pension (N)                      |                             |                          |                                   | NA                       | NA                      |
| Health-related quality of life (EQ-5D average +/- SD) |                             |                          |                                   | NA                       | NA                      |
| EQ VAS (average +/- SD)                               |                             |                          |                                   | NA                       | NA                      |

Abbreviations: ADE = ADR, untreated indication, dependency, intoxications, or ST; ADR = adverse drug reaction; COI = cost-of-illness; SD = standard deviation; ST = sub-therapeutic effect of medication therapy.

Population-based survey, research plan  
Hanna Gyllensten

2011-06-08

**Table 4. Societal COI of patients with self-reported ADRs or STs, description of patients and characteristics of drug-related morbidity:**

|                                | Patients with self-reported ADR or ST* | Societal COI (SEK) | Societal COI resulting from ADR and ST** (SEK) |
|--------------------------------|----------------------------------------|--------------------|------------------------------------------------|
|                                | N (%)                                  | (SEK)              | (SEK)                                          |
| Age                            |                                        |                    |                                                |
| 18 – 34 years                  |                                        |                    |                                                |
| 35 – 64 years                  |                                        |                    |                                                |
| 65 - years                     |                                        |                    |                                                |
| Sex                            |                                        |                    |                                                |
| Men                            |                                        |                    |                                                |
| Women                          |                                        |                    |                                                |
| Type of drug-related morbidity |                                        |                    |                                                |
| Adverse drug reactions         |                                        |                    |                                                |
| Therapeutic failures           |                                        |                    |                                                |
| Self-reported preventability   |                                        |                    |                                                |
| Preventable***                 |                                        |                    |                                                |
| Non-preventable                |                                        |                    |                                                |

\* Includes persons with at least one self-reported ADR or ST.

\*\* Includes either COI resulting from ADR or ST when describing the costs depending on type of drug-related morbidity.

\*\*\* Includes persons with at least one preventable self-reported ADR or ST.

Abbreviations: ADR = adverse drug reaction; COI = cost-of-illness; ST = sub-therapeutic effect of medication therapy.

**Figure 1: The societal COI in Sweden during 2010, divided into direct and indirect costs: societal COI in the population, societal COI in people with self-reported drug-related morbidity, and societal COI resulting from self-reported ADRs and STs.**

Description: Bar chart.

**Figure 2: The average monthly societal COI of Swedish citizens, divided into direct and indirect costs: average societal COI in the population, average societal COI of inhabitants with health care utilization, average societal COI in people with self-reported drug-related morbidity, and average societal COI resulting from self-reported ADRs and STs.**

Description: Bar chart.

**Figure 3: Health-related quality of life, estimated using the EQ-5D™ instrument.**

Description: Bar chart of averages (with t-tests of differences in averages between groups) in each dimension of the instrument, separated into three parallel bars: without drug-related morbidity, with ADEs, and with ADRs and STs.

Population-based survey, research plan  
Hanna Gyllensten

2011-06-08

**REFERENCES**

- Borgström, F., Zethraeus, N., Johnell, O., Lidgren, L., Ponzer, S., Svensson, O., Abdon, P., Ornstein, E., Lunsjo, K., Thorngren, K.G., Sernbo, I., Rehnberg, C., Jonsson, B. Costs and quality of life associated with osteoporosis-related fractures in Sweden. *Osteoporosis international* 2006;17(5):637-650.
- Burström, K., Johannesson, M., Diderichsen, F. Swedish population health-related quality of life results using the EQ-5D. *Quality of Life Research* 2001;10(7):621-635.
- Einarson, TR. Drug-related hospital admissions. *Annals of Pharmacotherapy* 1993;27(7-8):832-40.
- EuroQol Group. EuroQol - A new facility for the measurement of health-related quality of life. *Health Policy* 1990;16(3):199-208.
- Gandhi, T.K., Weingart, S.N., Borus, J., Seger, A.C., Peterson, J., Burdick, E., Seger, D.L., Shu, K., Federico, F., Leape, L.L. & Bates, D.W. Adverse drug events in ambulatory care. *New England Journal of Medicine* 2003;348(16):1556-1564.
- Horne, R., Weinman, J. & Hankins, M. The Beliefs about Medicines Questionnaire: The development and evaluation of a new method for assessing the cognitive representation of medication. *Psychology and Health* 1999;14(1):1-24.
- Isacson, D., Johansson, L., Bingefors, K. Nationwide survey of subjectively reported adverse drug reactions in Sweden. *Annals of Pharmacotherapy* 2008;42(3):347-353.
- Krähenbühl-Melcher, A., Schlienger, R., Lampert, M., Haschke, M., Drewe, J., Krähenbühl, S. Drug-related problems in hospitals: a review of the recent literature. *Drug Safety* 2007;30(5):379-407.
- Lindgren, B. Costs of illness in Sweden, 1964-1975. 1981 Liber, Lund, Sweden. ISBN 9140047911.
- NICE, National Institute for Health and Clinical Excellence. Guide to the methods of technology appraisal. Issue date: June 2008. ISBN: 1-84629-741-9.
- LFN, Pharmaceutical Benefits Board, Sweden. General guidelines for economic evaluations from the Pharmaceutical Benefits Board (LFNAR 2003:2). 2003.
- Rodríguez-Monguió, R., Otero, M.J., Rovira, J. Assessing the economic impact of adverse drug effects. *Pharmacoeconomics* 2003;21(9):623-650.
- Segel, J.E. Cost-of-Illness Studies-A Primer. Report of the RTI-UNC Center of Excellence in Health Promotion Economics. 2005.
- Tranmer, J.E., Guerriere, D.N., Ungar, W.J., Coyte, P.C. Valuing patient and caregiver time: a review of the literature. *Pharmacoeconomics*. 2005;23(5):449-59.
- Wettermark, B., Hammar, N., Fored, M., Leimanis, A., Otterblad Olausson, P., Bergman, U., Persson, I., Sundström, A., Westerholm, B., Rosén, M. The new Swedish Prescribed Drug Register—Opportunities for pharmacoepidemiological research and experience from the first six months. *Pharmacoepidemiology and Drug Safety* 2007;16(7):726-735.

Population-based survey, research plan  
Hanna Gyllenstein

2011-06-08

**List of variables to be used in this study**

| Content                | List of variables                                                                                                                                                                     | To be used for:                                                                               |
|------------------------|---------------------------------------------------------------------------------------------------------------------------------------------------------------------------------------|-----------------------------------------------------------------------------------------------|
| <b>Survey data</b>     |                                                                                                                                                                                       |                                                                                               |
| Respondent ID          | UENR                                                                                                                                                                                  | Identifying respondents.                                                                      |
| Drug-related morbidity | Case <sub>Adverse drug reaction</sub><br>Case <sub>Untreated indication</sub><br>Case <sub>Dependency</sub><br>Case <sub>Intoxication</sub><br>Case <sub>Sub-therapeutic effect</sub> | Identify respondents with drug-related morbidity, using variables from Katja.                 |
| Preventability         | Case <sub>Preventable ADR</sub><br>Case <sub>Preventable ST</sub>                                                                                                                     | Identify preventable drug-related morbidity, using variables from Katja.                      |
| Medicines              | F24_ant<br>F27_ant<br>F29_ant<br>F34_txt1<br>F40_txt1                                                                                                                                 | Identify use of dispences prescription medicines, over-the counter drugs and herbal remedies. |
| Health-care use        | F14_1-8<br>F14_txt<br>F33_1-8<br>F33_txt<br>F39_1-8<br>F39_txt                                                                                                                        | Identify health care use.                                                                     |
| Social services        | F19a<br>F19b_tim<br>F20a<br>F20b_dgr                                                                                                                                                  | Identify use of home help services and nursing home care.                                     |
| Transportation         | F14_1-8<br>F14_10-11<br>F33_1-8<br>F33_10-11<br>F39_1-8<br>F39_10-11<br>F18a<br>F18b_res                                                                                              | Identify use of health related traveling and mobility care.                                   |
| Informal care          | F21a<br>F21b_tim<br>F32a_5<br>F38a_5                                                                                                                                                  | Identify use of informal care.                                                                |
| Sick leave             | F16a<br>F16b_dgr<br>F16c_tim<br>F32a_4<br>F38a_4                                                                                                                                      | Identify sick leave.                                                                          |
| Leisure time           | F17a<br>F17b_dgr<br>F32a_2<br>F38a_2                                                                                                                                                  | Identify lost leisure time.                                                                   |
| HR-QoL                 | F12a-e                                                                                                                                                                                | Health-related quality of life-                                                               |

Population-based survey, research plan  
Hanna Gyllensten

2011-06-08

|                                            |                                                                                                                                                                                                         |                                                       |
|--------------------------------------------|---------------------------------------------------------------------------------------------------------------------------------------------------------------------------------------------------------|-------------------------------------------------------|
|                                            | F13_skala                                                                                                                                                                                               | measures.                                             |
| Occupation                                 | F09_1-11                                                                                                                                                                                                | Identify main occupation.                             |
| Results of drug-related morbidity          | F34_2<br>F34_txt2<br>F40_2<br>F40_txt2                                                                                                                                                                  | Description of drug-related morbidity results         |
| <b>LISA Database</b>                       |                                                                                                                                                                                                         |                                                       |
| Demographic and socio-economic information | Alder<br>Kon<br><br>Civil<br><br>FodlEgenEG15<br>FodlMorEG15<br>FodlFarEG15<br><br>Sun2000niva<br><br>SyssStatJ<br><br>DispInkPersF04                                                                   | Description of respondents and analysis of attrition. |
| Income, 2009                               | LoneInk<br><br>InkFNetto<br><br>StudDelt and Stud<br><br>Starting day of retirement and AldPens<br><br>ForLed<br><br>ArbLos, AlosDag, AdelDag, Ak14Dag, AstuDag, AsysDag and SocBidrPersF<br><br>VPLers | Sensitivity analysis of the productivity loss.        |
| Income, 2009                               | ForvErsNetto<br><br>CSFVI_08                                                                                                                                                                            | Checking for missing income information.              |



Population-based survey, research plan  
Hanna Gyllensten

2011-06-08

| <b>Swedish Prescribed Drug Register</b>                                   |                                                                                                                                  |                                                                                                                                                                                      |
|---------------------------------------------------------------------------|----------------------------------------------------------------------------------------------------------------------------------|--------------------------------------------------------------------------------------------------------------------------------------------------------------------------------------|
| Dispensed prescription medicines, autumn 2010 – questionnaire submission  | ATC<br>FDATUM<br>EDATUM<br>FORPSTL<br>ANTAL<br>DDDFORP                                                                           | Identify dispensed prescription medicines resulting from ADE.                                                                                                                        |
| Cost of dispensed prescription medicines, 2010 – questionnaire submission | PATKOST<br>MERKOST<br>LANKOST<br>MOMS                                                                                            | Estimate the average monthly cost of dispensed prescription medicines during 2010, and the cost during the month before questionnaire submission (part of the sensitivity analysis). |
| <b>Patient register</b>                                                   |                                                                                                                                  |                                                                                                                                                                                      |
| Hospitalizations, autumn 2010 – questionnaire submission                  | Inskrivningsdatum<br>Utskrivningsdatum<br>Vårdtid<br>Klinik                                                                      | Estimate the cost of hospitalizations during the month before questionnaire submission (part of the sensitivity analysis).                                                           |
| <b>Social Insurance in Sweden</b>                                         |                                                                                                                                  |                                                                                                                                                                                      |
| Sickness benefit, autumn 2010 – questionnaire submission                  | Sjukpenning<br>Rehabiliteringsersättning<br>Sjukersättning<br>Aktivitetsersättning<br><br>- Start date<br>- End date<br>- Extent | Sensitivity analysis of the productivity loss.                                                                                                                                       |
| Income, 2009                                                              | Vårdbidrag                                                                                                                       | Sensitivity analysis of the productivity loss.                                                                                                                                       |

1  
2  
3  
4  
5  
6  
7  
8  
9  
10  
11  
12  
13  
14  
15  
16  
17  
18  
19  
20  
21  
22  
23  
24  
25  
26  
27  
28  
29  
30  
31  
32  
33  
34  
35  
36  
37  
38  
39  
40  
41  
42  
43  
44  
45  
46  
47  
48  
49

STROBE statement checklist of items that should be included in the report:

| Item No                   | Recommendation                                                                                                                                                                                                                                                                                               | Comments about our paper                                                                                                                                                                                                                                                                                                                                                                                                                                                                                                                                                                                                                                                                                  |
|---------------------------|--------------------------------------------------------------------------------------------------------------------------------------------------------------------------------------------------------------------------------------------------------------------------------------------------------------|-----------------------------------------------------------------------------------------------------------------------------------------------------------------------------------------------------------------------------------------------------------------------------------------------------------------------------------------------------------------------------------------------------------------------------------------------------------------------------------------------------------------------------------------------------------------------------------------------------------------------------------------------------------------------------------------------------------|
| <b>Title and abstract</b> |                                                                                                                                                                                                                                                                                                              |                                                                                                                                                                                                                                                                                                                                                                                                                                                                                                                                                                                                                                                                                                           |
| 1                         | (a) Indicate the study's design with a commonly used term in the title or the abstract                                                                                                                                                                                                                       | √ Title: Population-based cross-sectional survey<br>√ Abstract: cross-sectional study                                                                                                                                                                                                                                                                                                                                                                                                                                                                                                                                                                                                                     |
|                           | (b) Provide in the abstract an informative and balanced summary of what was done and what was found                                                                                                                                                                                                          | √ What was done: Methods<br>√ What was found: Results                                                                                                                                                                                                                                                                                                                                                                                                                                                                                                                                                                                                                                                     |
| <b>Introduction</b>       |                                                                                                                                                                                                                                                                                                              |                                                                                                                                                                                                                                                                                                                                                                                                                                                                                                                                                                                                                                                                                                           |
| 2                         | Background/rationale                                                                                                                                                                                                                                                                                         | √ Introduction                                                                                                                                                                                                                                                                                                                                                                                                                                                                                                                                                                                                                                                                                            |
| 3                         | Objectives                                                                                                                                                                                                                                                                                                   | √ Aim in Introduction<br>No prespecified hypotheses, descriptive analysis only                                                                                                                                                                                                                                                                                                                                                                                                                                                                                                                                                                                                                            |
| <b>Methods</b>            |                                                                                                                                                                                                                                                                                                              |                                                                                                                                                                                                                                                                                                                                                                                                                                                                                                                                                                                                                                                                                                           |
| 4                         | Study design                                                                                                                                                                                                                                                                                                 | √ Title, Introduction and Methods                                                                                                                                                                                                                                                                                                                                                                                                                                                                                                                                                                                                                                                                         |
| 5                         | Setting                                                                                                                                                                                                                                                                                                      | √ Abstract and Methods/Participants and data collection                                                                                                                                                                                                                                                                                                                                                                                                                                                                                                                                                                                                                                                   |
| 6                         | Participants                                                                                                                                                                                                                                                                                                 | (a) <i>Cohort study</i> : Give the eligibility criteria, and the sources and methods of selection of participants. Describe methods of follow-up<br><i>Case-control study</i> : Give the eligibility criteria, and the sources and methods of case ascertainment and control selection. Give the rationale for the choice of cases and controls<br><i>Cross sectional study</i> : Give the eligibility criteria, and the sources and methods of selection of participants<br><br>(b) <i>Cohort study</i> : For matched studies, give matching criteria and number of exposed and unexposed<br><i>Case-control study</i> : For matched studies, give matching criteria and the number of controls per case |
| 7                         | Variables                                                                                                                                                                                                                                                                                                    | √ Methods/Participants and data collection<br><br>N/A                                                                                                                                                                                                                                                                                                                                                                                                                                                                                                                                                                                                                                                     |
| 8*                        | Data sources/measurement                                                                                                                                                                                                                                                                                     | √ Aim: Outcomes/diagnostic criteria: self-reported ADE<br>No analysis of predictors, confounders or effect modifiers                                                                                                                                                                                                                                                                                                                                                                                                                                                                                                                                                                                      |
| 9                         | Bias                                                                                                                                                                                                                                                                                                         | √ Methods                                                                                                                                                                                                                                                                                                                                                                                                                                                                                                                                                                                                                                                                                                 |
| 10                        | Study size                                                                                                                                                                                                                                                                                                   | √ Methods: Reminders were sent out.                                                                                                                                                                                                                                                                                                                                                                                                                                                                                                                                                                                                                                                                       |
| 11                        | Quantitative variables                                                                                                                                                                                                                                                                                       | √ Methods/Participants and data collection                                                                                                                                                                                                                                                                                                                                                                                                                                                                                                                                                                                                                                                                |
| 12                        | Statistical methods                                                                                                                                                                                                                                                                                          | √ Methods/Analyses                                                                                                                                                                                                                                                                                                                                                                                                                                                                                                                                                                                                                                                                                        |
|                           | (a) Describe all statistical methods, including those used to control for confounding                                                                                                                                                                                                                        | √ Methods/Analyses (no control for confounding)                                                                                                                                                                                                                                                                                                                                                                                                                                                                                                                                                                                                                                                           |
|                           | (b) Describe any methods used to examine subgroups and interactions                                                                                                                                                                                                                                          | √ Methods/Analyses (no interactions tested)                                                                                                                                                                                                                                                                                                                                                                                                                                                                                                                                                                                                                                                               |
|                           | (c) Explain how missing data were addressed                                                                                                                                                                                                                                                                  | √ Methods/Analyses (minimum estimation)                                                                                                                                                                                                                                                                                                                                                                                                                                                                                                                                                                                                                                                                   |
|                           | (d) <i>Cohort study</i> : If applicable, explain how loss to follow-up was addressed<br><i>Case-control study</i> : If applicable, explain how matching of cases and controls was addressed<br><i>Cross sectional study</i> : If applicable, describe analytical methods taking account of sampling strategy | N/A                                                                                                                                                                                                                                                                                                                                                                                                                                                                                                                                                                                                                                                                                                       |
|                           | (e) Describe any sensitivity analyses                                                                                                                                                                                                                                                                        | √ Methods/Analyses                                                                                                                                                                                                                                                                                                                                                                                                                                                                                                                                                                                                                                                                                        |

|                          | Item No | Recommendation                                                                                                                                                                                                                                                                                                      | Comments about our paper                                                                       |
|--------------------------|---------|---------------------------------------------------------------------------------------------------------------------------------------------------------------------------------------------------------------------------------------------------------------------------------------------------------------------|------------------------------------------------------------------------------------------------|
| <b>Results</b>           |         |                                                                                                                                                                                                                                                                                                                     |                                                                                                |
| Participants             | 13*     | (a) Report numbers of individuals at each stage of study: eg numbers potentially eligible, examined for eligibility, confirmed eligible, included in the study, completing follow-up, and analysed<br>(b) Give reasons for non-participation at each stage<br>(c) Consider use of a flow diagram                    | √ Results, paragraph 1<br><br>N/A: Lack information about reasons for non-participation<br>N/A |
| Descriptive data         | 14*     | (a) Give characteristics of study participants (eg demographic, clinical, social) and information on exposures and potential confounders<br>(b) Indicate number of participants with missing data for each variable of interest<br>(c) <i>Cohort study</i> : Summarise follow up time (eg average and total amount) | √ Tables 1 and 3<br><br>√ Table 1 (when relevant)                                              |
| Outcome data             | 15*     | <i>Cohort study</i> : Report numbers of outcome events or summary measures over time<br><i>Case-control study</i> : Report numbers in each exposure category, or summary measures of exposure<br><i>Cross sectional study</i> : Report numbers of outcome events or summary measures                                | √ Results, table 2                                                                             |
| Main results             | 16      | (a) Report the numbers of individuals at each stage of the study: eg numbers potentially eligible, examined for eligibility, confirmed eligible, included in the study, completing follow-up, and analysed<br>(b) Give reasons for non-participation at each stage<br>(c) Consider use of a flow diagram            | √ Results<br><br>N/A: Lack information about reasons for non-participation (see item 13c)      |
| Other analyses           | 17      | Report other analyses done: eg analyses of subgroups and interactions, and sensitivity analyses                                                                                                                                                                                                                     | √ Results, table 3                                                                             |
| <b>Discussion</b>        |         |                                                                                                                                                                                                                                                                                                                     |                                                                                                |
| Key results              | 18      | Summarise key results with reference to study objectives                                                                                                                                                                                                                                                            | √ Discussion, paragraph 1                                                                      |
| Limitations              | 19      | Discuss limitations of the study, taking into account sources of potential bias or imprecision. Discuss both direction and magnitude of any potential bias                                                                                                                                                          | √ Direction and magnitude: Discussion/Strengths and weaknesses                                 |
| Interpretation           | 20      | Give a cautious overall interpretation of results considering objectives, limitations, multiplicity of analyses, results from similar studies, and other relevant evidence                                                                                                                                          | √ Discussion, Comparison with previous research                                                |
| Generalisability         | 21      | Discuss the generalisability (external validity) of the study results                                                                                                                                                                                                                                               | √ Discussion, Comparison with previous research                                                |
| <b>Other information</b> |         |                                                                                                                                                                                                                                                                                                                     |                                                                                                |
| Funding                  | 22      | Give the source of funding and the role of the funders for the present study and, if applicable, for the original study on which the present article is based                                                                                                                                                       | √ Funding                                                                                      |

\*Give information separately for cases and controls in case-control studies and, if applicable, for exposed and unexposed groups in cohort and cross sectional studies.

## Health economic checklist of items to be reported:

|                                               | Item No | Checklist item                                                                                                                            | Page in our paper where the item is dealt with                                                             |
|-----------------------------------------------|---------|-------------------------------------------------------------------------------------------------------------------------------------------|------------------------------------------------------------------------------------------------------------|
| <b>Study design</b>                           |         |                                                                                                                                           |                                                                                                            |
|                                               | 1       | The research question is stated                                                                                                           | √ Introduction, paragraph 3                                                                                |
|                                               | 2       | The economic importance of the research question is stated                                                                                | √ Introduction, paragraph 2                                                                                |
|                                               | 3       | The viewpoint(s) of the analysis are clearly stated and justified                                                                         | √ Methods/Analyses paragraph 1                                                                             |
|                                               | 4       | The rationale for choosing the alternative programmes or interventions compared is stated                                                 | N/A: No programmes or interventions compared                                                               |
|                                               | 5       | The alternatives being compared are clearly described                                                                                     | N/A: No programmes or interventions compared                                                               |
|                                               | 6       | The form of economic evaluation used is stated                                                                                            | √ Methods/Analyses paragraph 1                                                                             |
|                                               | 7       | The choice of form of economic evaluation is justified in relation to the questions addressed                                             | √ Introduction, paragraph 2                                                                                |
| <b>Data collection</b>                        |         |                                                                                                                                           |                                                                                                            |
|                                               | 8       | The source(s) of effectiveness estimates used are stated                                                                                  | N/A: No effectiveness estimates are used.                                                                  |
|                                               | 9       | Details of the design and results of effectiveness study are given (if based on a single study)                                           | N/A: no effectiveness measured                                                                             |
|                                               | 10      | Details of the method of synthesis or meta-analysis of estimates are given (if based on an overview of a number of effectiveness studies) | N/A: no synthesis or meta-analysis of effectiveness studies                                                |
|                                               | 11      | The primary outcome measure(s) for the economic evaluation are clearly stated                                                             | √ Methods/Analyses paragraph 1                                                                             |
|                                               | 12      | Methods to value health states and other benefits are stated                                                                              | √ Methods/Costs of resource use, paragraphs 1-4                                                            |
|                                               | 13      | Details of the subjects from whom valuations were obtained are given                                                                      | √ Methods/Participants and data collection, paragraph 1                                                    |
|                                               | 14      | Productivity changes (if included) are reported separately                                                                                | √ Table 2                                                                                                  |
|                                               | 15      | The relevance of productivity changes to the study question is discussed                                                                  | N/A: only descriptive data                                                                                 |
|                                               | 16      | Quantities of resources are reported separately from their unit costs                                                                     | √ Table 2                                                                                                  |
|                                               | 17      | Methods for the estimation of quantities and unit costs are described                                                                     | √ Methods/Participants and data collection, paragraph 2-3;<br>Methods/Costs of resource use, paragraph 1-4 |
|                                               | 18      | Currency and price data are recorded                                                                                                      | √ Methods, sections about Direct costs, Indirect costs, and Analyses<br>Table 2                            |
|                                               | 19      | Details of currency of price adjustments for inflation or currency conversion are given                                                   | √ Methods/Analyses                                                                                         |
|                                               | 20      | Details of any model used are given                                                                                                       | N/A: No model used                                                                                         |
|                                               | 21      | The choice of model used and the key parameters on which it is based are justified                                                        | N/A: No model used                                                                                         |
| <b>Analysis and interpretation of results</b> |         |                                                                                                                                           |                                                                                                            |
|                                               | 22      | Time horizon of costs and benefits is stated                                                                                              | √ Methods/Analyses paragraph 2                                                                             |
|                                               | 23      | The discount rate(s) is stated                                                                                                            | N/A: No discounts made                                                                                     |
|                                               | 24      | The choice of rate(s) is justified                                                                                                        | N/A: No discounts made                                                                                     |
|                                               | 25      | An explanation is given if costs or benefits are not discounted                                                                           | √ Methods/Indirect costs                                                                                   |
|                                               | 26      | Details of statistical tests and confidence intervals are given for stochastic data                                                       | √ Methods/Analyses                                                                                         |

| Item No | Checklist item                                                             | Page in our paper where the item is dealt with            |
|---------|----------------------------------------------------------------------------|-----------------------------------------------------------|
| 27      | The approach to sensitivity analysis is given                              | √ Methods/Analyses paragraph 2                            |
| 28      | The choice of variables for sensitivity analysis is justified              | √ Methods/Sensitivity analyses                            |
| 29      | The ranges over which the variables are varied are stated                  | N/A: Costs based on national statistics, no ranges tested |
| 30      | Relevant alternatives are compared                                         | N/A: No programmes or interventions compared              |
| 31      | Incremental analysis is reported                                           | N/A: No incremental analysis made                         |
| 32      | Major outcomes are presented in a disaggregated as well as aggregated form | √ Tables 2-3                                              |
| 33      | The answer to the study question is given                                  | √ Results, paragraphs 2-3                                 |
| 34      | Conclusions follow from the data reported                                  | √ Conclusions                                             |
| 35      | Conclusions are accompanied by the appropriate caveats                     | √ Conclusions                                             |

Authors may enter N/A if an item on the checklist is not appropriate, but this is only acceptable for items 9, 10, 12-15, 20, 21, 23-29, and 31.



**Cost-of-Illness of patient-reported Adverse Drug Events – A  
population-based cross-sectional survey**

|                                 |                                                                                                                                                                                                                                                                                                                                                                                                                                                                                                                                                                                                                                                                                                             |
|---------------------------------|-------------------------------------------------------------------------------------------------------------------------------------------------------------------------------------------------------------------------------------------------------------------------------------------------------------------------------------------------------------------------------------------------------------------------------------------------------------------------------------------------------------------------------------------------------------------------------------------------------------------------------------------------------------------------------------------------------------|
| Journal:                        | <i>BMJ Open</i>                                                                                                                                                                                                                                                                                                                                                                                                                                                                                                                                                                                                                                                                                             |
| Manuscript ID:                  | bmjopen-2013-002574.R1                                                                                                                                                                                                                                                                                                                                                                                                                                                                                                                                                                                                                                                                                      |
| Article Type:                   | Research                                                                                                                                                                                                                                                                                                                                                                                                                                                                                                                                                                                                                                                                                                    |
| Date Submitted by the Author:   | 02-May-2013                                                                                                                                                                                                                                                                                                                                                                                                                                                                                                                                                                                                                                                                                                 |
| Complete List of Authors:       | Gyllensten, Hanna; Nordic school of public health NHV, Rehnberg, Clas; Karolinska Institutet, Department of Learning, Informatics, Management and Ethics – LIME<br>Jönsson, Anna; Faculty of Health Sciences, Linköping University, Department of Drug Research/Clinical Pharmacology; County Council of Östergötland, Department of Clinical Pharmacology<br>Petzold, Max; Sahlgrenska academy, University of Gothenburg, Department of Public Health and Community Medicine<br>Carlsten, Anders; Nordic school of public health NHV, Andersson Sundell, Karolina; Nordic school of public health NHV, ; Sahlgrenska Academy, University of Gothenburg, Department of Public Health and Community Medicine |
| <b>Primary Subject Heading</b>: | Public health                                                                                                                                                                                                                                                                                                                                                                                                                                                                                                                                                                                                                                                                                               |
| Secondary Subject Heading:      | Epidemiology, Health economics, Health services research, Pharmacology and therapeutics                                                                                                                                                                                                                                                                                                                                                                                                                                                                                                                                                                                                                     |
| Keywords:                       | EPIDEMIOLOGY, HEALTH ECONOMICS, Health & safety < HEALTH SERVICES ADMINISTRATION & MANAGEMENT, PUBLIC HEALTH, Adverse events < THERAPEUTICS                                                                                                                                                                                                                                                                                                                                                                                                                                                                                                                                                                 |
|                                 |                                                                                                                                                                                                                                                                                                                                                                                                                                                                                                                                                                                                                                                                                                             |

SCHOLARONE™  
Manuscripts

**TITLE**

Cost-of-Illness of patient-reported Adverse Drug Events – A population-based cross-sectional survey

**Authors**

Hanna Gyllensten, doctoral student (**corresponding author**)

Nordic School of Public Health NHV, Box 121 33, SE-402 42 Gothenburg, Sweden

Phone: +46-31-693925

Fax: +46-31-691777

Clas Rehnberg, Professor

Department of Learning, Informatics, Management and Ethics – LIME, Karolinska Institutet, Stockholm, Sweden

Anna K. Jönsson, PhD

Department of Drug Research/Clinical Pharmacology, Faculty of Health Sciences, Linköping University, Linköping, Sweden, and Department of Clinical Pharmacology, County Council of Östergötland, Linköping, Sweden

Max Petzold, Professor

Akademistatistik – Centre for applied biostatistics, Sahlgrenska academy, University of Gothenburg, Department of Public Health and Community Medicine, Gothenburg, Sweden

Anders Carlsten, Associate professor

Nordic School of Public Health NHV, Gothenburg, Sweden, and Medical Products Agency, Uppsala, Sweden

Karolina Andersson Sundell, Associate professor

Nordic School of Public Health NHV, Gothenburg, Sweden, and Unit of Social Medicine, Department of Public Health and Community Medicine, Sahlgrenska Academy, University of Gothenburg, Gothenburg, Sweden

**Keywords**

adverse drug event

drug therapy

cost of illness

quality of life

survey

**Word count:** 4782 (excl. tables and figures)

## ABSTRACT

### Objectives

To estimate the cost-of-illness (COI) of individuals with self-reported adverse drug events (ADE) from a societal perspective and to compare these estimates with the COI for individuals without ADE. Furthermore, to estimate the direct costs resulting from two ADE-categories, adverse drug reactions (ADR) and sub-therapeutic effects of medication therapy (STE).

### Design

Cross-sectional study

### Setting

The adult Swedish general population

### Participants

The survey was distributed to a random sample of 14,000 Swedish residents aged 18 years and older, of which 7,099 responded, 1,377 reported at least one ADE and 943 reported an ADR or STE.

### Main outcome measures

Societal COI, including direct and indirect costs, for individuals with at least one self-reported ADE, and the direct costs for prescription drugs and healthcare use resulting from self-reported ADRs and STEs, were estimated during 30 days using a bottom-up approach.

### Results

The economic burden for individuals with ADEs were (95% confidence interval) 442.7 to 599.8 international dollars (Int\$) of which direct costs were Int\$ 279.6 to 420.0 (67.1%), and indirect costs were Int\$ 143.0 to 199.8 (32.9%). The average COI was higher among those reporting ADEs compared to other respondents (COI: Int\$ 185.8 to 231.2). The COI of respondents reporting at least one ADR or STE was Int\$ 468.9 to 652.9. Direct costs resulting from ADRs or STEs were Int\$ 15.0 to 48.4. The reported resource use occurred both in hospitals and outside in primary care.

### Conclusions

Self-reported ADRs and STEs cause resource use both in hospitals and in primary care. Moreover, ADEs seem to be associated with high overall COI from a societal perspective, when comparing respondents with and without ADEs. There is a need to further examine this relationship, and to study the indirect costs resulting from ADEs.



## ARTICLE SUMMARY

### Article focus

- Adverse drug events have been reported not only to cause harm but also cause resource use from patients attending hospitals.
- Even though adverse drug events have been identified also outside hospitals, little is known about the associated resource use.
- Thus we conducted a population-based survey to identify the economic burden of diseases in individuals with adverse drug events and compare to those without adverse drug events.

### Key messages

- Our study suggests high overall costs of illness for individuals with self-reported adverse drug events, estimated to more than 500 international dollars per person monthly in Sweden when including those with adverse drug reactions, drug dependence, drug intoxications, sub-therapeutic effects of medication therapy and untreated indications.
- The estimated direct costs for prescribed drugs and healthcare use resulting from treatment of two of the adverse drug event categories, i.e. adverse drug reactions and sub-therapeutic effects of medication therapy, were 30 international dollars per person monthly. This corresponds to more than 10% of all costs for prescribed drugs and healthcare use among these individuals.
- A large proportion (56%) of the healthcare resource use in respondents with adverse drug events occurred in the outpatient setting.

### Strengths and limitations of this study

- The main strength is the population-based design, including outpatient and inpatient healthcare, drug use, social services and transportation, lost productivity from both respondents and relatives, and health-related quality of life.
- The main limitation of the study is the response rate (50%), where some groups were somewhat underrepresented in the analysis.

## INTRODUCTION

Adverse drug events (ADEs), “an injury resulting from medical intervention related to a drug”,<sup>1</sup> have been identified as a public health problem that causes harm to patients and considerable resource use. According to previous research, 5-6 % of hospitalizations are drug-related,<sup>2,3</sup> and hospitalized patients experiencing adverse drug effects cause additional hospital costs of USD 2284-5640 per patient (in 2000 values).<sup>4</sup> Little is known about the corresponding costs outside hospitals,<sup>4,5</sup> or the magnitude of the problem in the general public, although patient-reported adverse drug reactions (ADR) have been reported to affect 6% of the Swedish population.<sup>6</sup>

The cost-of-illness (COI) is the economic burden of disease or diseases to the society. The distribution of cost items in the COI can be used to judge the financial relevance of a specific health issue in relation to other public health problems, and to study the development of the associated resource use over time for different actors in the healthcare system.<sup>7</sup> Information about COI could also be useful for developing future intervention studies to address ADEs and to retrieve the costs for modelling e.g. cost-effectiveness of drug use in the general public.

Thus, we conducted a population-based survey to study self-reported ADEs. In ADEs we included ADRs, sub-therapeutic effects of medication therapy (STE), drug dependence, drug intoxications and untreated indications. This deviates from common ADE inclusions used in many previous studies, focusing on ADRs and medication errors,<sup>3</sup> but were developed from exploring also e.g. drug-related problems that may cause drug-related morbidity. The aim of the current study was to estimate and compare the COI of individuals with and without self-reported ADEs, from a societal perspective. A secondary aim was to estimate the direct costs resulting from two ADE-categories, ADRs and STEs. Additional results for prevalence and preventability of self-reported ADEs are reported elsewhere.<sup>8</sup>

## METHODS

### Study design

We conducted a population-based observational retrospective COI study of self-reported ADEs from a cross-sectional survey. The COI was prevalence-based and measured from a societal perspective, including direct and indirect costs during the 30 days study period. Costs were measured using a bottom-up approach using unit costs for self-reported resource use and productivity loss from short-term sick-leave and informal care. Intangibles were approximated using health-related quality of life.

### ADE definitions

The terminology within patient safety related to drug therapy varies.<sup>9,10</sup> ADEs have e.g. been defined as events that occur during drug treatment without a causal relationship to the drug,<sup>11</sup> or according the definition used in this study,<sup>1</sup> that indicates a relationship between the treatment and the negative outcome. From a public health perspective, there is a need to describe the epidemiology and negative consequences of drug therapy, as a complement to measures of its beneficial effects. ADR reporting has recently been expanded to all *suspected ADRs*, including overdose, misuse, abuse, medication errors, and reactions associated with occupational exposure.<sup>12</sup> Thus the reporting now includes both adverse effects occurring at normal doses and the consequences of errors. Still, there are other pathways for which drug treatment may cause harm. Examples are drug dependence,<sup>13</sup> and insufficient effect of medicines that may occur also at normal doses (often referred to as non-responders to the medication).<sup>14</sup> Moreover, untreated indication has been suggested to cause e.g. drug-related hospitalisations.<sup>15</sup> Part of these events will be weighed into the decision to initiate drug treatment.

All ADEs included in this study were self-reported, thus we included preventable and non-preventable ADRs, STE, drug dependence, drug intoxications and untreated indications, as reported

1  
2 by the drug users. Due to data constraints, it was unfeasible to perform a formal causality  
3  
4 assessment for the cases, although reported ADEs were examined to exclude obvious deviations  
5  
6 from our aim (e.g. drug dependence reported for hypertension treatments). The categories were  
7  
8 selected to be mutually exclusive, and clarified in the questionnaire: ADRs were described as side-  
9  
10 effects, STEs were less effect than expected, drug dependence were explained by the inability to  
11  
12 stop using the medication, drug intoxications were associated with using too much of the  
13  
14 medication, and untreated indications were symptoms for which the respondent considered he or  
15  
16 she would have needed drug treatment. Only reported drug dependence associated with addictive  
17  
18 medications were included in the final analyses.  
19  
20  
21  
22  
23

#### 24 **Participants and data collection**

25  
26 A random sample of 14,000 Swedish residents aged 18 years or older was identified by Statistics  
27  
28 Sweden from the Swedish adult population (7,382,226 individuals) on January 1<sup>st</sup> 2010. The sample  
29  
30 size was calculated by assuming a one-month prevalence of 6.4% for ADRs in Sweden based on a  
31  
32 previous study,<sup>6</sup> a preventable proportion of approximately 10%,<sup>16,17</sup> a 60% response rate,<sup>6</sup> and a  
33  
34 maximum width of  $\pm 0.3\%$  for the 95% confidence interval of the preventable proportion. The  
35  
36 estimated sample size (7,013) was doubled to enable analyses of predictors and costs. The cross  
37  
38 sectional postal survey was sent in the first week of October 2010. Statistics Sweden distributed the  
39  
40 surveys and collected the responses. The envelope contained a letter with information relevant for  
41  
42 the informed consent, the questionnaire, and a prepaid envelope for returning the questionnaire.  
43  
44 Three reminders were sent, one postcard and two with questionnaires. Data collection was closed  
45  
46 February 1<sup>st</sup> 2011.  
47  
48  
49  
50  
51  
52

53 The questionnaire encompassed, for the past 30 days, questions on use of healthcare and social  
54  
55 services; use of prescribed and over-the-counter medicines (OTC) as well as herbal remedies;  
56  
57 experienced ADEs; and perceived preventability, consequences and use of healthcare due to ADRs  
58  
59  
60

1 and STEs. The questions of resource use after ADRs or STEs were: Overall, how were you affected  
2 by [ADR/STE] during the last 30 days: [seven check boxes for alternative effects]? If you indicated  
3 any of [three selected check boxes]: how many days [were you unable to conduct your leisure  
4 activities / did you stay home from work or equivalent / did you have help from relatives to conduct  
5 everyday activities]? How many times during the last 30 days did you have any of the following  
6 [healthcare] contacts due to [ADR/STE]: [ten types of healthcare encounters indicated, free text  
7 space and a check box for those not having had healthcare contacts]? Have your treatment/s been  
8 adjusted due to [ADR/STE] during the last 30 days: Yes, a new drug treatment was initiated, with  
9 [free text box to indicate drug]; Yes, existing drug treatment was changed, e.g. stopped or dose  
10 adjustment; Yes, a new other treatment was initiated (e.g. lifestyle change, surgery/orthopaedic  
11 treatment), namely [free text box to indicate treatment]; No, the treatment was not changed? The  
12 questionnaire also included demographic and socioeconomic characteristics, and the EQ-5D  
13 questionnaire for health-related quality of life<sup>18</sup>. The questionnaire was piloted with healthcare  
14 professionals, individuals from the general public and specific patient groups. All reported ADEs  
15 were carefully examined by one of the researchers, a pharmacist (Katja M. Hakkarainen), , to  
16 exclude responses not indicating a suspected symptom or drug. The first author, HG, also a  
17 pharmacist with clinical experience, did an independent examination of 10% of reported ADEs.  
18 Differences in opinion were discussed in the research group to reach consensus.

19  
20  
21  
22  
23  
24  
25  
26  
27  
28  
29  
30  
31  
32  
33  
34  
35  
36  
37  
38  
39  
40  
41  
42  
43  
44 Data from the questionnaire was combined with register data by record linkage using each  
45 respondent's unique personal identification number, by Statistics Sweden. The register data  
46 included demographic and socioeconomic variables from the Longitudinal Integration Database for  
47 Health Insurance and Labour Market Studies from Statistics Sweden; sick-leave and disability  
48 pension from the Swedish Social Insurance Agency; as well as filled prescriptions from the Swedish  
49 Prescribed Drug Register and hospitalisations from the Swedish Patient Register, the last two are  
50 held by the National Board of Health and Welfare.

### Direct costs

Direct costs included used resources: i.e. costs resulting from prescription drugs, healthcare, social services and transportation. Direct costs resulting from ADRs or STEs included the costs for prescription drugs and healthcare use caused by either ADRs or STEs reported by the respondents.

Dispensed prescription medicines and associated costs were retrieved from the Swedish Prescribed Drug Register, National Board of Health and Welfare. Costs included both patient co-payments and expenses for medicines, and costs paid by the reimbursement scheme. The prescription drug cost during the study period was the average cost per month calculated from the 2010 annual prescription medicine cost per respondent. Costs of medicine use resulting from ADRs or STEs were the cost of any medicine reported by the survey respondents to be initiated for treating an ADR or STE, that was dispensed during the study period according to data from the Swedish Prescribed Drug Register. Costs for adjustments to the drug treatment related to e.g. drugs administered from healthcare units, initiation of drug treatment for which the individual already had the medication, initiation of a prescription that was not filled during the period for which we had register data, initiation of over the counter drugs or herbal remedies that are not registered, dose adjustments, and termination of drug treatment were excluded.

Healthcare use, both overall healthcare use and encounters resulting from ADRs or STEs, were retrieved from the questionnaire, i.e. self-reported by the respondents. Results from pre-specified questions and from free text were categorized into: phone calls, nurse visits, outpatient physician visits, home healthcare, specialist physician and emergency department visits, visits to other healthcare personnel in somatic care, psychiatrist visits, visits to other healthcare personnel in psychiatric care, and hospitalizations. Encounters for healthcare use of relatives, and respondent's donations of blood or tissues, were not included in respondents' healthcare use. Unit costs of

1 healthcare services were based on national statistics on healthcare use and costs.<sup>19</sup> A visit to other  
2 healthcare personnel than physicians was weighted as 40% of the cost of a physician visit. Phone  
3 calls were weighted as 1/3 of the cost of visiting a nurse, and home healthcare as 2 times the cost of  
4 a nurse visit. Costs paid by the patient were not included in the healthcare costs (2.3% of the  
5 proceeds to the healthcare producers<sup>19</sup>).

6  
7  
8  
9  
10  
11  
12  
13  
14  
15 Costs for social services included nursing home stay and home-help services reported in the  
16 questionnaire. Transportation costs included reported transportation for the disabled and other  
17 transportation for healthcare encounters, identified from the questionnaire. Costs for overall use of  
18 social services and transportation were based on national statistics.<sup>20-22</sup>

### 19 20 21 22 23 24 25 26 **Indirect costs**

27  
28 Indirect costs included costs resulting from lost productivity for the respondent due to self-reported  
29 short-term morbidity (sick-leave) and of relatives to the respondents' due to informal care.<sup>7</sup> Sick-  
30 leave below two weeks is not reported in the Social Insurance Agency's register. Because of the  
31 study design, it was not possible to identify deaths during the study period, and there were no  
32 respondents initiating disability pension during the study period, therefore no future indirect costs  
33 were estimated.<sup>23</sup> In addition, productivity loss due to reported long-term sick-leave (among those  
34 <70 years) and disability pension (among those <65 years) was calculated. Sick-leave and disability  
35 pension during the study period were identified from the questionnaire, and the costs for lost  
36 productivity were measured by the human capital approach,<sup>7</sup> using national wages statistics and  
37 social security contributions.<sup>24,25</sup>

### 38 39 40 41 42 43 44 45 46 47 48 49 50 51 52 53 **Additional resource use and intangibles**

54  
55 Visits to dental care and pharmacies, and lost leisure time, were reported descriptively. In addition  
56 to the estimated costs for healthcare and drug use, resource use resulting from ADRs and STEs was  
57  
58  
59  
60

reported descriptively; including changes to drug therapy not identified as a dispensed medicine in the register during the study period, days of lost leisure time, patients' sick-leave and relatives' informal care. Intangible costs were omitted in the cost analysis, but pain and suffering was approximated by the respondents' health-related quality of life using EQ-5D-5L (the EuroQol Group's five dimension health state questionnaire with five levels of severity) and the UK value sets.<sup>26,27</sup> The EQ-5D-5L is a generic health-related quality of life instrument with five dimensions: mobility, self-care, usual activities, pain/discomfort, and anxiety/depression. Each dimension has five levels of severity: no problems/slight problems/moderate problems/severe problems/extreme problems. The responses for each dimension created a health profile for each respondent, that was transferred using the stated value set to the respondents' EQ-5D index value: ranging from dead (=0) to full health (=1). The EQ-5D-5L responses were complemented with results from the EQ-VAS scale (the EuroQol Group's visual analogue scale): from 'Worst imaginable health state' (=0) to 'best imaginable health state' (=100).

### Analyses

Respondents' characteristics were compared to the non-respondents, and compared based on ADE status (table 1), using register data for: age (young adults age 18-34, middle aged 35-64 years old, or individuals above the Swedish retirement age  $\geq 65$  years old), country of birth (Sweden or other than Sweden), educational level (mandatory education, intermediate education, i.e. high school and up to two years of university education, or high education, i.e. more than two years of university education), income during 2009, marital status, and sex. Main occupation was interpreted from survey responses for occupations, age and income data during 2009. Differences in characteristics were tested for statistical significance (at  $p < 0.05$ ), for respondents with or without ADEs, using chi square tests.

**Table 1. Description of the study population and comparison with non-respondents.**

| Respondents reporting ADE | Respondents not reporting ADE | All respondents | Non-respondents |
|---------------------------|-------------------------------|-----------------|-----------------|
| Total = 1,377             | Total = 5,722                 | Total = 7,099   | Total = 6,832   |



|                                                       | N (%)       | N (%)       | N (%)      | N (%)      |
|-------------------------------------------------------|-------------|-------------|------------|------------|
| <b>Age<sup>#</sup></b>                                |             |             |            |            |
| 18 – 34 years                                         | 294(21.4)   | 1036(18.1)  | 1330(18.7) | 2328(34.1) |
| 35 – 64 years                                         | 675(49.0)   | 2935(51.3)  | 3610(50.9) | 3357(49.1) |
| 65 – years                                            | 408(29.6)   | 1751(30.6)  | 2159(30.4) | 1147(16.8) |
| <b>Sex<sup>#</sup></b>                                |             |             |            |            |
| Men                                                   | 528(38.3)   | 2732(47.7)  | 3260(45.9) | 3715(54.4) |
| Women                                                 | 849(61.7)   | 2990(52.3)  | 3839(54.1) | 3117(45.6) |
| <b>Country of birth</b>                               |             |             |            |            |
| Sweden                                                | 1218 (88.5) | 1276 (92.7) | 6280(88.5) | 5328(78.0) |
| Other than Sweden                                     | 159 (11.5)  | 101 (7.3)   | 819(11.5)  | 1504(22.0) |
| <b>Marital status</b>                                 |             |             |            |            |
| Single                                                | 457(33.2)   | 1774(31.0)  | 2231(31.4) | 3226(47.2) |
| Married or registered partnership                     | 633(46.0)   | 2872(50.2)  | 3505(49.4) | 2424(35.5) |
| Divorced                                              | 188(13.7)   | 681(11.9)   | 869(12.2)  | 802(11.7)  |
| Widowed                                               | 99(7.2)     | 395(6.9)    | 494(7.0)   | 380(5.6)   |
| <b>Education<sup>**</sup></b>                         |             |             |            |            |
| Mandatory education                                   | 240(17.6)   | 1144(20.1)  | 1499(21.1) | 1804(26.4) |
| Intermediate education                                | 655(48.0)   | 2840(49.9)  | 3438(48.4) | 3483(51.0) |
| High education                                        | 471(34.5)   | 1706(30.0)  | 2115(29.8) | 1342(19.6) |
| <b>Main occupation<sup>#†</sup></b>                   |             |             |            |            |
| Employee                                              | 584(43.0)   | 2783(49.0)  | 3367(47.8) | NA         |
| Company owner                                         | 58(4.3)     | 351(6.2)    | 409(5.8)   | NA         |
| Student                                               | 81(6.0)     | 290(5.1)    | 371(5.3)   | NA         |
| Retired                                               | 391(28.8)   | 1697(29.9)  | 2088(29.7) | NA         |
| On long-term sickness absence or disability pensioner | 131(9.7)    | 202(3.6)    | 333(4.7)   | NA         |
| Other                                                 | 112(8.3)    | 359(6.3)    | 471(6.7)   | NA         |
| <b>Income in 2009<sup>#</sup></b>                     |             |             |            |            |
| Int\$ ≤ 13,848                                        | 322(23.4)   | 1046(18.3)  | 1368(19.3) | 2248(32.9) |
| Int\$ 13,848-22,490                                   | 299(21.7)   | 1162(20.3)  | 1461(20.6) | 1267(18.5) |
| Int\$ 22,490-30,245                                   | 290(21.1)   | 1192(20.8)  | 1482(20.9) | 1279(18.7) |
| Int\$ 30,245-39,661                                   | 259(18.8)   | 1235(21.6)  | 1494(21.0) | 1109(16.2) |
| Int\$ 39,662 ≥                                        | 207(15.0)   | 1087(19.0)  | 1294(18.2) | 929(13.6)  |

Resource use quantities, percentages and costs are rounded.

<sup>#</sup> Statistically significant difference between respondents with/without ADEs ( $p < 0.05$ ).

<sup>\*</sup> Educational level was missing for 47 of the respondents (0.7%), of which 11 were ADE cases, and 203 of the non-respondents (3.0%).

<sup>†</sup> Occupation was missing for 60 respondents, of which 20 were ADE cases.

Abbreviations: ADE = adverse drug events; Int\$ = international dollars; NA = not applicable.

1 All unit costs (table 2) were translated to international dollars (Int\$) using the 2010 purchasing  
2 power parity for gross domestic product (1 Int\$ = 9.026383 Swedish krona).<sup>28</sup> The Int\$ is a  
3 hypothetical currency with the same purchasing power as the United States dollar (US\$) in the  
4 Unites States of America, allowing for differences in price levels between countries.<sup>29</sup> Means and  
5 standard deviations for direct costs, indirect costs and COI were calculated for the 30 day period.  
6 Cost differences were tested for statistical significance (at  $p < 0.05$ ), for respondents with or without  
7 ADEs, and for ADE-respondents with or without at least one ADRs or STEs, using a two-tailed t-  
8 test with unequal variances. Cost differences and respondents' characteristics were tested for  
9 statistical significance (at  $p < 0.05$ ), for respondents with at least one ADRs or STEs, using one-way  
10 anova (for age categories) and a two-tailed t-test with unequal variances (for sex). All statistical  
11 analyses were made using the STATA 10.1 software.  
12  
13  
14  
15  
16  
17  
18  
19  
20  
21  
22  
23  
24  
25  
26  
27  
28  
29  
30  
31  
32  
33  
34  
35  
36  
37  
38  
39  
40  
41  
42  
43  
44  
45  
46  
47  
48  
49  
50  
51  
52  
53  
54  
55  
56  
57  
58  
59  
60

**Table 2. Resource use in respondents with ADEs, and unit costs for the resources.**

|                                        | <b>Respondents<br/>reporting ADE and<br/>resource use</b> | <b>Quantity of<br/>resources used</b> | <b>Unit cost</b> |
|----------------------------------------|-----------------------------------------------------------|---------------------------------------|------------------|
|                                        | Total = 1377<br>N (% of total)                            | N or hours                            | (Int\$)          |
| <b>DIRECT COSTS:</b>                   |                                                           |                                       |                  |
| <b>Dispensed medicines<sup>#</sup></b> | 1218 (88.5)                                               | 26,436                                | -                |
| <b>Healthcare use:</b>                 |                                                           |                                       |                  |
| Phone calls                            | 106 (7.7)                                                 | 267                                   | 18.5             |
| Nurse visits                           | 93 (6.8)                                                  | 182                                   | 55.4             |
| Physicians visits                      | 92 (6.7)                                                  | 124                                   | 138.6            |
| Specialist physician and ED visits     | 91 (6.6)                                                  | 191                                   | 313.0            |
| Home healthcare                        | 6 (0.4)                                                   | 39                                    | 110.9            |
| Other somatic visits                   | 52 (3.8)                                                  | 159                                   | 55.4             |
| Psychiatrist visits                    | 4 (0.3)                                                   | 4                                     | 407.5            |
| Other psychiatric visits               | 49 (3.6)                                                  | 120                                   | 163.0            |
| Hospitalizations                       | 16 (1.2)                                                  | 20                                    | 5036.7           |
| <b>Social services:</b>                |                                                           |                                       |                  |
| Home-help services                     | 52 (3.8)                                                  | 1851                                  | 45.7             |
| Nursing homes                          | 19 (1.4)                                                  | 480                                   | 173.9            |
| <b>Transportation:</b>                 |                                                           |                                       |                  |
| Services for disabled                  | 38 (2.8)                                                  | 420                                   | 29.8             |
| Other transportation                   | 240 (17.4)                                                | 2793                                  | 2.5              |
| <b>INDIRECT COSTS:</b>                 |                                                           |                                       |                  |
| <b>Sick-leave (by age):</b>            |                                                           |                                       |                  |
| 18-24 years                            | 24 (23.1)                                                 | 1000                                  | 12.1*            |
| 25-34 years                            | 35 (18.4)                                                 | 1690                                  | 15.7*            |
| 35-44 years                            | 36 (19.1)                                                 | 1852                                  | 18.2*            |
| 45-54 years                            | 29 (13.0)                                                 | 1186                                  | 18.5*            |
| 55+ years                              | 39 (5.8)                                                  | 2062                                  | 18.2*            |
| <b>Informal care</b>                   | 228 (16.6)                                                | 2871                                  | 17.2*            |

Resource use quantities, percentages and costs are rounded.

<sup>#</sup> Based on register data.

\* The unit cost indicated was the average wage per hour in each age group<sup>24</sup>, which was then multiplied by the general payroll tax. For citizens <26 years of age the general payroll tax was 15.49% and for citizens ≥26 years of age it was 31.42%.<sup>25</sup> For the informal care, the indicated unit cost was the average wage per hour, which was then multiplied by the general payroll tax for citizen's ≥26 years of age.

Abbreviations: ADE = adverse drug events; ED = emergency department; Int\$ = international dollars; N = number; NA = not applicable; Q = quartile.

## Sensitivity analyses

Sensitivity analyses were made based on available register data for hospitalizations and respondents' lost productivity from sick-leave. Due to skewed data, 80% of the direct costs for respondents with ADEs were reported by 10% of these respondents (figure 1), a sensitivity analysis proposed in the research plan, based on interquartile range of responses, was unachievable.

Propensity score matching and analyses were conducted to estimate the direct healthcare costs and indirect costs (excluding informal care), respectively, attributable to ADEs. Propensity scores were calculated by logistic regression from respondent ADE status and characteristics (age, sex country of birth, educational level, main occupation, income category, and self-reported prescription drug use). Single nearest neighbour matching with calipers (0.01) and without replacement was made using the Psmatch2 module for STATA.<sup>30</sup> The matching resulted in 1362 pairs of respondents (excluding 15 respondents reporting ADE), each respondent with self-reported ADEs matched by the estimated propensity scores to a respondent without ADE, for whom costs were compared.

Additional changes from the research plan were limited to how results were reported.

**Figure 1: Accumulated direct costs of individuals with self-reported ADEs, including the subgroup reporting ADRs or STEs.**

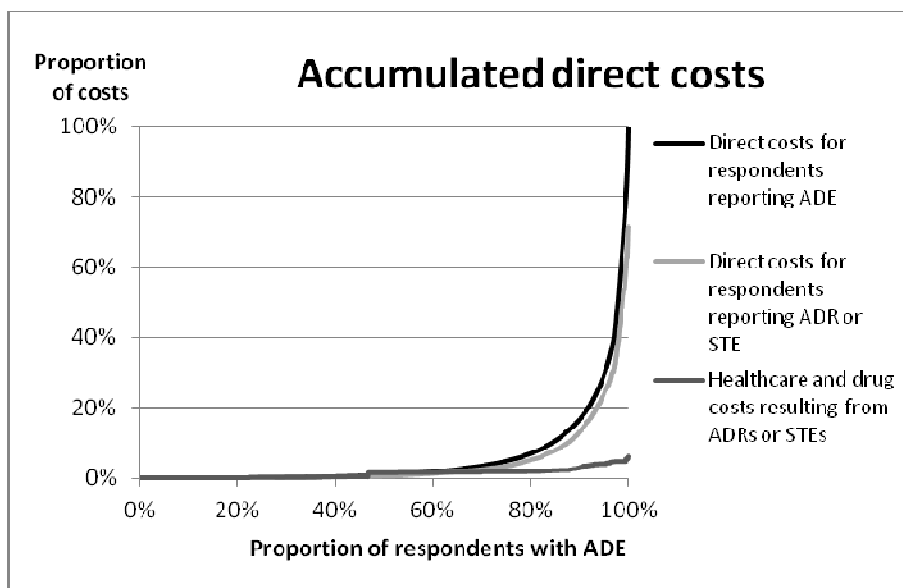

Abbreviations: ADE = adverse drug events; ADR = adverse drug reaction; STE = sub-therapeutic effect of medication therapy.

## RESULTS

A total of 7,099 questionnaires were collected (response rate 51 %). At least one ADE was reported by 1,377 (19.4%) respondents. Of these, 68.5% (943 respondents), reported at least one ADR or STE. There were statistically significant differences in age ( $p < 0.05$ ), sex ( $p < 0.001$ ), education ( $p < 0.01$ ), main occupation ( $p < 0.001$ ), and income ( $p < 0.001$ ), comparing respondents reporting at least one ADE compared to other respondents (table 1). Resource use for respondents with self-reported ADE is presented in table 2. Healthcare was attended by 239 (17.4%) of respondents reporting ADEs, of which 96 (40.2%) were hospitalized or visited a specialist physician (including psychiatrist visits). Among all respondents, 717 (10.1%) attended healthcare. Resource use among respondents with ADE included also outpatient care in hospitals with other healthcare personnel and primary care visits (e.g. nurse visits and physician visits). In addition, home-help services or a nursing home was attended by 51 (4.5%), of the 1,138 respondents with ADE that did not attend healthcare, while 164 (14.4%) reported informal care and 131 (11.5%) had stayed home from work.

The economic burden for individuals with self-reported ADEs were (mean  $\pm$  standard deviation, 95% confidence interval) Int\$ 521.2  $\pm$  1,485.7, Int\$ 442.7 to 599.8, of which direct costs were measured at Int\$ 349.8  $\pm$  1,328.7, Int\$ 279.6 to 420.0 (67.1%) and indirect costs were Int\$ 171.4  $\pm$  537.1, Int\$ 143.0 to 199.8 (32.9%) (table 3 and figure 2). The average COI was higher among those reporting ADEs compared to respondents without ADEs (COI: Int\$ 208.5  $\pm$  876.3, Int\$ 185.8 to 231.2) ( $p < 0.001$ ). Productivity loss due to long-term sick-leave and disability pension increased the indirect costs by Int\$ 353.5  $\pm$  1,149.6 for those with self-reported ADEs and Int\$ 133.0  $\pm$  728.5 for other respondents ( $p < 0.001$ ). The COI of respondents with ADR or STE was Int\$ 560.9  $\pm$  1,439.8, Int\$ 468.9 to 652.9. Resource use among respondents with self-reported ADEs, or resulting from ADRs or STEs, occurred both in hospitals and outside of hospital in primary care. For respondents with ADEs, 12% of the healthcare costs originated from primary care nurse or general

1  
2  
3  
4  
5  
6  
7  
8  
9  
10  
11  
12  
13  
14  
15  
16  
17  
18  
19  
20  
21  
22  
23  
24  
25  
26  
27  
28  
29  
30  
31  
32  
33  
34  
35  
36  
37  
38  
39  
40  
41  
42  
43  
44  
45  
46  
47  
48  
49  
50  
51  
52  
53  
54  
55  
56  
57  
58  
59  
60

practitioner visits, while the remaining costs were equally distributed to other outpatient care (44%) and hospitalisations (44%), while the proportions were: 15%, 44% and 41%, among all respondents.

For peer review only

**Table 3. Average cost-of-illness for patients with and without self-reported ADEs.**

|                                                       | <b>COI<br/>with ADE</b><br>N = 1377<br>average ± SD | <b>COI<br/>without ADE</b><br>N = 5722<br>average ± SD |
|-------------------------------------------------------|-----------------------------------------------------|--------------------------------------------------------|
| Dispensed prescription medicines (Int\$) <sup>#</sup> | 48.6 ± 119.0                                        | 24.7 ± 103.3                                           |
| Healthcare use (Int\$) <sup>#</sup>                   | 164.9 ± 935.3                                       | 40.1 ± 360.7                                           |
| Social services (Int\$)                               | 122.1 ± 778.8                                       | 83.6 ± 673.5                                           |
| Transportation (Int\$) <sup>#</sup>                   | 14.3 ± 84.8                                         | 6.9 ± 67.2                                             |
| <b>Total direct cost (Int\$)<sup>#</sup></b>          | <b>349.8 ± 1,328.7</b>                              | <b>155.2 ± 805.3</b>                                   |
| Productivity loss, sick-leave (Int\$) <sup>#</sup>    | 124.4 ± 496.2                                       | 41.1 ± 272.8                                           |
| Informal care <sup>†</sup> (Int\$) <sup>#</sup>       | 47.1 ± 187.0                                        | 12.1 ± 89.3                                            |
| <b>Total indirect cost (Int\$)<sup>#</sup></b>        | <b>171.4 ± 537.1</b>                                | <b>53.3 ± 290.9</b>                                    |
| <b>COST-OF-ILLNESS (Int\$)<sup>#</sup></b>            | <b>521.2 ± 1,485.7</b>                              | <b>208.5 ± 876.3</b>                                   |
| <b>Other resource use:</b>                            |                                                     |                                                        |
| Over-the-counter drugs, number                        | 1.6 ± 1.5                                           | 1.0 ± 1.9                                              |
| Natural remedies, number                              | 0.5 ± 1.0                                           | 0.3 ± 1.2                                              |
| Lost leisure time, days                               | 3.7 ± 7.8                                           | 1.0 ± 4.2                                              |
| Prevalent disability pension, n (%)                   | 135 (9.8)                                           | 242 (4.2)                                              |
| EQ-5D™ index value                                    | 0.71 ± 0.22                                         | 0.84 ± 0.18                                            |
| Self-rated health by EQ-VAS                           | 69.8 ± 20.7                                         | 81.2 ± 16.9                                            |

Resource use quantities, percentages and costs are rounded.

<sup>#</sup> Statistically significant cost difference between respondents with/without ADEs (p<0.05).

<sup>†</sup> Of the 546 respondents reporting informal care, 56 respondents were excluded from the analyses since the amount of care (days and hours) was not reported.

Abbreviations: ADE = adverse drug events; EQ-5D™ = The EuroQol Group's five dimension health state questionnaire with five levels of severity; EQ-VAS = The EuroQol Group's visual analogue scale; Int\$ = international dollars; N = population size; SD = standard deviation.



**Figure 2: The average monthly cost-of-illness of respondents based on reported ADE-status and healthcare attendance, divided into direct and indirect costs.**

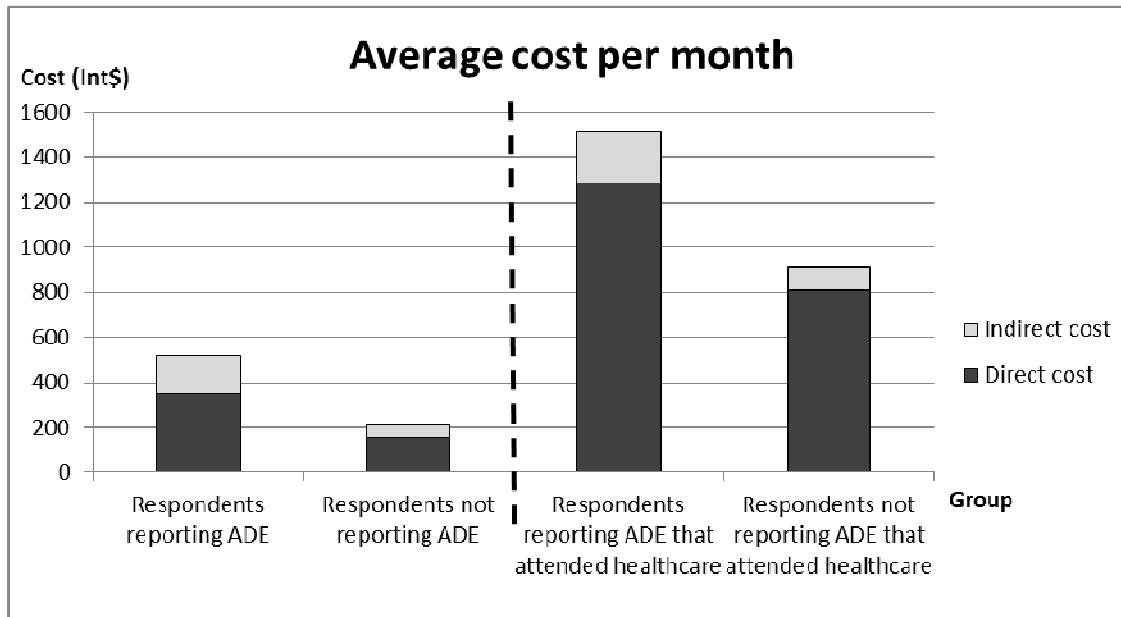

Abbreviations: ADE = adverse drug events; Int\$ = international dollars.

Among all respondents with at least one self-reported ADR or STE, the average direct costs resulting from ADRs and STEs were Int\$ 31.7 ± 8.5, Int\$ 15.0 to 48.4. The resulting costs correspond to 8.7% of the direct costs and 12.5% of the costs of prescription drugs and healthcare use for those with ADRs or STEs. The average direct costs resulting from ADRs were Int\$ 0.5 ± 4.1 for prescription drugs and Int\$ 17.3 ± 159.0 for healthcare use, for those with ADRs. For STEs the average direct costs were Int\$ 1.4 ± 8.7 and Int\$ 33.9 ± 281.2, respectively. Extrapolated to the Swedish population, the annual direct costs resulting from ADRs or STEs were Int\$ 370.1 million. There were no statistically significant differences in COI for respondents with ADRs or STEs, or direct costs resulting from the ADRs or STEs, by age or sex (table 4).

**Table 4. Distribution of costs among respondents with self-reported ADRs or STEs\*, including cost-of-illness (all-cause morbidity) and direct costs resulting from self-reported ADRs or STEs.**

|                                                                             | Respondents<br>with ADR or STE<br>N (%) | Average cost-of-illness<br>for respondents<br>with ADR or STE<br>average ± SD, Int\$ | Direct cost<br>resulting from the<br>ADRs or STEs*<br>average ± SD, Int\$ |
|-----------------------------------------------------------------------------|-----------------------------------------|--------------------------------------------------------------------------------------|---------------------------------------------------------------------------|
| <b>Total resource use among the respondents with ADRs or STEs (N = 943)</b> |                                         |                                                                                      |                                                                           |
| Cost-of-illness                                                             | -                                       | 560.9 ± 1,439.8                                                                      | NA                                                                        |
| Direct costs                                                                | -                                       | (365.6 ± 1,279.4)                                                                    | NA                                                                        |
| Indirect costs                                                              | -                                       | (195.3 ± 564.7)                                                                      | NA                                                                        |
| <b>Age</b>                                                                  |                                         |                                                                                      |                                                                           |
| 18 – 34 years                                                               | 209 (22.2)                              | 556.5 ± 1,580.8                                                                      | 31.4 ± 241.7                                                              |
| 35 – 64 years                                                               | 473 (50.2)                              | 511.5 ± 1,154.4                                                                      | 41.5 ± 326.9                                                              |
| 65 – years                                                                  | 261 (27.7)                              | 653.9 ± 1,754.8                                                                      | 14.3 ± 77.3                                                               |
| <b>Sex</b>                                                                  |                                         |                                                                                      |                                                                           |
| Men                                                                         | 346 (36.7)                              | 486.4 ± 1,182.8                                                                      | 32.1 ± 232.4                                                              |
| Women                                                                       | 597 (63.3)                              | 604.0 ± 1,568.9                                                                      | 31.5 ± 276.7                                                              |
| <b>Type of ADE<sup>†</sup></b>                                              |                                         |                                                                                      |                                                                           |
| ADR                                                                         | 554 (58.7)                              | 659.0 ± 1,613.6                                                                      | 36.6 ± 290.8                                                              |
| STE                                                                         | 539 (57.2)                              | 566.0 ± 1,446.1                                                                      | 47.5 ± 335.5                                                              |
| <b>Self-reported preventability<sup>‡</sup></b>                             |                                         |                                                                                      |                                                                           |
| Preventable <sup>‡</sup>                                                    | 208 (22.1)                              | 717.6 ± 1,897.3                                                                      | 56.8 ± 342.9                                                              |
| Non-preventable                                                             | 735 (77.9)                              | 516.5 ± 1,279.2                                                                      | 24.7 ± 232.7                                                              |

Percentages and costs are rounded.

# Include persons with at least one self-reported ADR or STE.

\* Include resource use reported for both ADRs and STEs.

† Categories overlap, both includes persons with at least one self-reported ADR or STE respectively.

‡ Includes persons with at least one preventable self-reported ADR or STE.

Abbreviations: ADR = adverse drug reaction; Int\$ = international dollars; N = subgroup sample size; NA = not applicable; STE = sub-therapeutic effect of medication therapy.

Additional resource use attributed to ADRs by 554 respondents, reported during the 30 days study period, included: 90 medication changes not registered in the Swedish Prescribed Drug Register, 1,448 days of lost leisure time (n = 117), 529 days of sick-leave (n = 61), and 600 days with informal care (n = 49). For STEs, additional resource use among the 539 respondents included: 116 medication changes, 2,510 days of lost leisure time (n = 187), 857 days of sick-leave (n = 88), and 1,171 days with informal care (n = 92). The health-related quality of life scores were significantly lower for respondents with ADEs compared to other respondents (figure 3): the EQ-5D™ summary estimates were  $0.84 \pm 0.18$  vs.  $0.71 \pm 0.22$  ( $p < 0.001$ ), and results from the visual analogue scale were  $69.79 \pm 20.69$  vs.  $81.17 \pm 16.94$  ( $p < 0.001$ ).

**Figure 3: Dimensions of health-related quality of life, health profile results from the EQ-5D™ instrument, the severity reported for each domain used as 1-5 point Likert scale (from 'no problem' to 'extreme problem'), categorized based on reported ADE-status.**

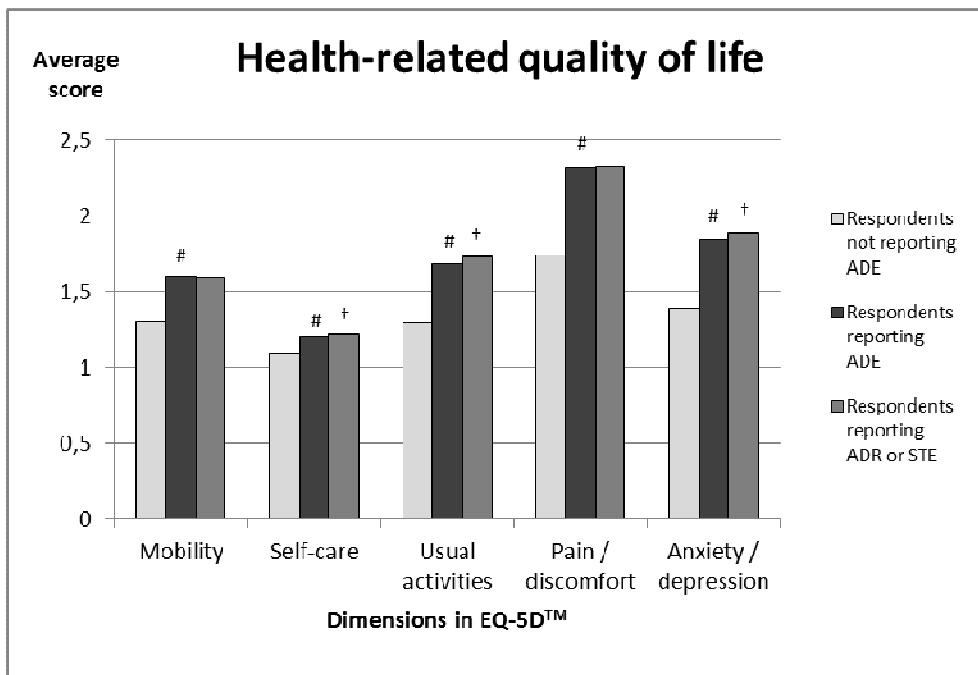

# Statistically significant difference between respondents with/without ADEs ( $p < 0.05$ ).

† Statistically significant difference between respondents with at least one ADR or STE compared to other respondents with ADEs ( $p < 0.05$ ).

Abbreviations: ADE = adverse drug events; ADR = adverse drug reaction; EQ-5D™ = The EuroQol Group's five dimension health state questionnaire with five levels of severity; STE = sub-therapeutic effect of medication therapy.

### Sensitivity analyses

The hospitalization rate reported in the survey (19 respondents reported 24 hospitalizations during the study period) was compared to the hospitalization rate identified from register data: 85 respondents had 101 hospitalizations covering a total of 365 days during the 5 weeks before answering the survey. Thus the sensitivity of the reporting of hospitalizations in the questionnaire was 59% and the specificity was 99% compared to register data. Among the 85 respondents, 24 hospitalisations lasted only one day or night, 10 hospitalisations occurred less than one week before the respondent's questionnaire was registered at Statistics Sweden, and 7 hospitalisations identified from the register were duplicate registrations based on transfers between hospitals or departments. For sick-leave, the sensitivity was 12% and the specificity was 99%, compared to register data, with 55 persons identified from both the register and the questionnaire. Of the 70 respondents identified from the register but not from the questionnaire, 25 reported to be on long-term sickness absence, seeking a job or on parental leave, 45 persons had not reported the sick-leave identified in the register. Of those 390 persons reporting sick-leave that were not identified in the register, 306 reported sick-leave of less than 2 weeks (which in Sweden is paid by the employer and is not registered), 7 had disability pension and the remaining 77 persons did not receive sickness benefit for their absence. Additional deviations were not possible to explain using available data. According to the propensity score analyses, the attributable costs for ADEs were Int\$ 99.4 for direct healthcare costs and Int\$ 221.5 for indirect costs (excluding informal care).

## DISCUSSION

In this study, the societal COI of 1,377 individuals with self-reported ADEs was Int\$ 717,750.4 and the direct costs resulting from self-reported ADRs and STEs in 943 individuals was Int\$ 29,935.9. Thus, the extrapolated annual direct costs in Sweden resulting from ADRs and STEs, was Int\$ 370 million in 2010. Our results suggest that ADEs cause costs also outside hospitals, and for patients not attending hospitals. Thus, studies limited to drug-related admission will underestimate the economic impact in society. We have also found an association between the occurrence of ADEs and high overall COI that needs further analysing in future studies. Those reporting ADEs were more extensive users of prescription drugs, healthcare resource use, transportation services, and informal care, compared to other respondents. Moreover, they had more short-term sick-leave and disability pension than other respondents. Much of this increase in resource use will be due to co-morbidities, and will be involved in causing the ADE, but although not quantified as costs caused by ADEs, some respondents also reported that they had experienced sick-leave, informal care and lost leisure time resulting from ADRs and STEs.

The strengths of this study include a large number of respondents. However, certain groups were underrepresented among respondents, e.g. young adults, men, and those born in another country than Sweden. It is possible that the decision to respond is associated with health status, with either severely ill patients or healthy citizens being less prone to respond. Previous research suggests the bias is mainly towards survey respondents being healthier than those not responding.<sup>32</sup> Other causes for incorrect estimation of the costs for ADEs in our study were the limitation to ADE status and used resources reported by the respondents. Responses were carefully examined to exclude responses not indicating a suspected symptom or drug, there may be symptoms reported that were e.g. resulting from the underlying disease rather than the drug use, and other relevant symptoms may not have been perceived to be related to the drug use by the respondent or not being included

1  
2 in the five ADE categories included in the questionnaire. Previous research has shown that there is  
3  
4 little overlap between ADEs reported by patients and by physicians,<sup>33</sup> thus we may underestimate  
5  
6 the prevalence and resulting resource use of ADEs by not including also the physicians'  
7  
8 experiences. However, previous research has identified patients themselves as important actors in  
9  
10 reporting adverse events, also due to drug use.<sup>34</sup> Moreover, the general public is today expected to  
11  
12 monitor drug use and report suspected ADRs. Thus we believe that the self-reported ADEs reported  
13  
14 in our survey adds a relevant aspect to the knowledge of drug use outcomes, although it needs to be  
15  
16 acknowledged that the events were self-reported and not assessed for causality by any experienced  
17  
18 clinician. The sensitivity analyses included comparing the resource use to what was reported in  
19  
20 national registers, including data for hospitalizations and sick-leave. The register analyses indicated  
21  
22 an underreporting rather than overestimation of the resource use. Moreover, our main cause for  
23  
24 underestimating the COI may be the limitation of indirect costs to short-term sick-leave and  
25  
26 informal care. In a recent study of the total COI in Sweden, short-term sickness represented  
27  
28 approximately 30% of the indirect costs and 17% of the COI.<sup>35</sup> Lost wages and household  
29  
30 production has been reported to cause 47% of the total costs in patients discharged from hospital  
31  
32 with adverse events (of which ADEs corresponded to 32% of all costs).<sup>36</sup> Our design (time frame  
33  
34 and data collection method) did not allow estimation of indirect costs from disability pension and  
35  
36 mortality, thus underestimating the economic impact of ADEs.  
37  
38  
39  
40  
41  
42

43  
44 Our ADE definition was more inclusive than some previous studies',<sup>3</sup> although the included  
45  
46 categories' associations with drug treatment and drug-related problems has previously been  
47  
48 acknowledged. Based on the ADE definition applied, the prevalence and associated costs will differ.  
49  
50 Limiting the inclusion to only e.g. ADRs and STEs resulted in a prevalence of 13% in the Swedish  
51  
52 population which is equal to the previously estimated ambulatory care prevalence of ADEs.<sup>37</sup> Our  
53  
54 estimated one-month prevalence of ADRs of 7.8% was similar to the 2-week prevalence (6.4%)  
55  
56 identified in a previous survey in the Swedish general public.<sup>6</sup>  
57  
58  
59  
60

1  
2  
3  
4 Our results suggests that the drug users experience ADEs and associated consequences that have so  
5 far not been included in studies of injuries resulting from medical intervention related to drugs, and  
6 thus needs to be further explored to identify causes, consequences and possibilities for prevention.  
7  
8  
9  
10 In our study, less than one fifth of respondents with ADEs attended healthcare during the study  
11 period, and on fifth of those with ADRs or STEs reported drug-related healthcare contacts. A  
12 previous study has reported that three quarters of elderly participants experiencing ADRs contacted  
13 a physician and 5% were also hospitalized due to the ADR during a one year study period,<sup>38</sup> but the  
14 disparity may depend on the length of the study period and the age of respondents. Our average  
15 direct costs resulting from ADRs (Int\$ 37) were, as expected, low compared to previous estimates  
16 of approximately Euro 2,800 for ADRs in patients attending hospitals.<sup>39</sup> Though, the small  
17 proportion of respondents reporting healthcare contacts due to their ADR or STE (with no  
18 respondent reporting hospitalization due to an ADR or STE), and the short study period, makes  
19 direct comparisons impossible. Our estimated average direct cost for respondents with ADEs that  
20 attended healthcare during the study period (Int\$ 1,283) was similar to the attributable charges  
21 previously reported for ADEs identified after a visit to ambulatory care: US\$ 926 (2006 value).<sup>40</sup>  
22  
23  
24  
25  
26  
27  
28  
29  
30  
31  
32  
33  
34  
35  
36  
37  
38  
39

40 According to our results, there is a need for increased awareness about the impact of ADEs which  
41 does not result in the patient attending hospital. Lundkvist and Jönsson<sup>42</sup> have previously remarked  
42 on the balance between costs of ADRs and benefits of drug treatments, and the two costs of ADRs:  
43 costs resulting from treating the ADR and from avoiding ADRs. Moreover, additional efforts are  
44 needed to handle STE, which seem to be just as common and costly as ADRs. According to our  
45 results, the balancing of costs and benefits for drugs will also include the occurrence of and costs  
46 associated with insufficient effects of medicines, although not all of these costs will be possible to  
47 prevent or avoid through improved drug treatments. Since ADE status seems to be associated with  
48 high overall COI and incur healthcare resource use, many of these patients should be possible to  
49  
50  
51  
52  
53  
54  
55  
56  
57  
58  
59  
60

1 identify in the healthcare system, even when the ADE in itself may not be the main cause of  
2  
3 resource use. Based on the perspective of a decision or analysis, our results indicate that such costs  
4  
5 will occur also outside the healthcare system, e.g. for sick-leave, informal care and lost leisure time.  
6  
7 The result was strengthened by the propensity score analyses, indicating both direct healthcare  
8  
9 costs, and indirect costs, attributable to ADEs. Thus the patient's views and experiences of drug  
10  
11 treatments needs to be further addressed in treatment decisions.  
12  
13

14  
15  
16  
17 Future research is needed to further analyze the relationship between ADEs and the associated  
18  
19 resource use, to identify when and how the resource use occurs, and the true relationship between  
20  
21 ADEs and the overall COI. There is also a need to examine the indirect costs resulting from ADEs,  
22  
23 since our study could only briefly describe sick-leave and informal care resulting from ADRs and  
24  
25 STEs. Moreover, the resource use identified from patients self-reports should be contrasted by  
26  
27 population-based estimates of ADEs and the associated resource use identified by healthcare  
28  
29 professionals, to enable further analyses of the clinical and economic impact of ADEs, identify  
30  
31 high-risk patients, and study the causes and consequences of ADEs in the general public.  
32  
33  
34  
35  
36  
37

## 38 CONCLUSIONS

39  
40  
41 To our knowledge, this is the first study estimating the COI of ADEs in the general public. Our  
42  
43 results show that self-reported ADRs and STEs cause resource use both in hospitals and primary  
44  
45 care. Moreover, ADEs seem to be associated with high overall COI from the societal perspective,  
46  
47 when comparing respondents with and without ADEs. There is a need to further examine the  
48  
49 relationships between ADEs and associated resource use and overall COI, respectively, and to study  
50  
51 the indirect costs resulting from ADEs.  
52  
53  
54  
55  
56  
57  
58  
59  
60



## ACKNOWLEDGEMENT

We wish to thank the survey respondents for taking the time to share their experience with us.

## ETHICS APPROVAL

The study received ethical approval from the Regional Ethical Review Board in Gothenburg (approval reference number: 238-10), in 2010.

The questionnaire cover letter included information about how and why the research was conducted, contact information, and how to withdraw. Informed consent was implied by returning the questionnaire. The questionnaire and the cover letter were developed in accordance with the declaration of Helsinki.

The ethical approval did not include an approval to share individual responses or register data publicly.

## COMPETING INTEREST DECLARATION

All authors have completed the Unified Competing Interest form at [www.icmje.org/coi\\_disclosure.pdf](http://www.icmje.org/coi_disclosure.pdf) (available on request from the corresponding author) and declare: all authors had financial support from National Corporation of Swedish Pharmacies (Apoteket AB) for the submitted work; no financial relationships with any organisations that might have an interest in the submitted work in the previous 3 years; no other relationships or activities that could appear to have influenced the submitted work.

The opinions or assertions contained herein are the private views of the authors, and are not to be construed as official or as reflecting the views of the Medical Products Agency.

## FUNDING

The research is part of the DRUMS project (Drug-related morbidity and mortality in Sweden: prevalence, preventability and costs) funded by an unrestricted grant from the National Corporation of Swedish Pharmacies (Apoteket AB). The study sponsor had no role in the study design; in the collection, analysis, and interpretation of data; in the writing of the article; and in the decision to submit it for publication. The researchers work was independent from the sponsor. All authors, external and internal, had full access to all of the data (including statistical reports and tables) in the study and can take responsibility for the integrity of the data and the accuracy of the data analysis.

## DETAILS OF CONTRIBUTORS

KAS was the principal investigator. HG did the analyses and drafted the manuscript. AC, AKJ, CR, HG, KAS and MP contributed to the study design and development of the questionnaire, data

1  
2 analysis, and interpretation of the results and commented on the draft. Also, Katja M Hakkarainen,  
3 Staffan Hägg, Johnny Pettersson and Annika Yeiter contributed to the study design, and the  
4 development and piloting of the questionnaire. Tatiana Zverkova Sandström contributed to the data  
5 analysis. All authors had full access to all data. HG is the guarantor of the study.  
6  
7

## 8 **LICENCE FOR PUBLICATION**

9

10  
11 The Corresponding Author has the right to grant on behalf of all authors and does grant on behalf of  
12 all authors, an exclusive licence (or non-exclusive for UK Crown Employees) on a worldwide basis  
13 to the BMJ Publishing Group Ltd, and its Licensees to permit this article (if accepted) to be  
14 published in BMJ open and any other BMJ PGL products and to exploit all subsidiary rights, as set  
15 out in our licence.  
16  
17  
18  
19  
20  
21  
22  
23  
24  
25  
26  
27  
28  
29  
30  
31  
32  
33  
34  
35  
36  
37  
38  
39  
40  
41  
42  
43  
44  
45  
46  
47  
48  
49  
50  
51  
52  
53  
54  
55  
56  
57  
58  
59  
60

**REFERENCES**

1. Bates DW, Boyle DL, Vander Vliet MB, Schneider J, Leape L. Relationship between medication errors and adverse drug events. *J Gen Intern Med* 1995; **10**(4): 199-205. doi:10.1007/BF02600255.
2. Einarson TR. Drug-related hospital admissions. *Ann Pharmacother* 1993; **27**(7-8): 832-40.
3. Krähenbühl-Melcher A, Schlienger R, Lampert M, Haschke M, Drewe J, Krähenbühl S. Drug-related problems in hospitals: a review of the recent literature. *Drug Saf* 2007; **30**(5): 379-407.
4. Rodríguez-Monguió R, Otero MJ, Rovira J. Assessing the economic impact of adverse drug effects. *Pharmacoeconomics* 2003; **21**(9): 623-50.
5. Gyllensten H, Jönsson AK, Rehnberg C, Carlsten A. How are the costs of drug-related morbidity measured?: a systematic literature review. *Drug Saf* 2012; **35**(3): 207-19. doi:10.2165/11597090-000000000-00000; 10.2165/11597090-000000000-00000.
6. Isacson D, Johansson L, Binge-fors K. Nationwide survey of subjectively reported adverse drug reactions in Sweden. *Ann Pharmacother* 2008; **42**(3): 347-53. doi:10.1345/aph.1K488.
7. Segel JE. Cost-of-Illness Studies - A Primer. *RTI International* 2006; : 1-39.

- 1  
2  
3  
4  
5  
6  
7  
8  
9  
10  
11  
12  
13  
14  
15  
16  
17  
18  
19  
20  
21  
22  
23  
24  
25  
26  
27  
28  
29  
30  
31  
32  
33  
34  
35  
36  
37  
38  
39  
40  
41  
42  
43  
44  
45  
46  
47  
48  
49  
50  
51  
52  
53  
54  
55  
56  
57  
58  
59  
60
8. Hakkarainen KM, Andersson Sundell K, Petzold M, Hägg S. Self-reported adverse drug events equally prevalent across age groups - a population-based survey in Sweden. Manuscript submitted for publication. .
  9. Aronson JK, Ferner RE. Clarification of terminology in drug safety. *Drug Saf* 2005; **28**(10): 851-70.
  10. Yu K, Nation R, Dooley M. Multiplicity of medication safety terms, definitions and functional meanings: when is enough enough? *Qual Saf Health Care* 2005; **14**(5): 358-63.
  11. Edwards IR, Aronson JK. Adverse drug reactions: definitions, diagnosis, and management. *Lancet* 2000; **356**(9237): 1255-9. doi:10.1016/S0140-6736(00)02799-9.
  12. European Parliament, Council of the European Union. Directive 2010/84/EU of the European Parliament and of the Council of 15 December 2010 amending, as regards pharmacovigilance, Directive 2001/83/EC on the Community code relating to medicinal products for human use. *Official Journal* 2010; **L 348**: 74-99.
  13. Young AM, Glover N, Havens JR. Nonmedical use of prescription medications among adolescents in the United States: a systematic review. *J Adolesc Health* 2012; **51**(1): 6-17. doi:10.1016/j.jadohealth.2012.01.011; 10.1016/j.jadohealth.2012.01.011.

- 1  
2  
3  
4  
5  
6  
7  
8  
9  
10  
11  
12  
13  
14  
15  
16  
17  
18  
19  
20  
21  
22  
23  
24  
25  
26  
27  
28  
29  
30  
31  
32  
33  
34  
35  
36  
37  
38  
39  
40  
41  
42  
43  
44  
45  
46  
47  
48  
49  
50  
51  
52  
53  
54  
55  
56  
57  
58  
59  
60
14. Taylor S, Abramowitz JS, McKay D. Non-adherence and non-response in the treatment of anxiety disorders. *J Anxiety Disord* 2012; **26**(5): 583-9. doi:10.1016/j.janxdis.2012.02.010; 10.1016/j.janxdis.2012.02.010.
15. Al-Olah YH, Al Thiab KM. Admissions through the emergency department due to drug-related problems. *Ann Saudi Med* 2008; **28**(6): 426-9.
16. Gandhi TK, Seger DL, Bates DW. Identifying drug safety issues: from research to practice. *Int J Qual Health Care* 2000; **12**(1): 69-76. doi:10.1093/intqhc/12.1.69.
17. Gandhi TK, Weingart SN, Borus J, Seger AC, Bates DW. Adverse drug events in ambulatory care. *N Engl J Med* 2003; **348**(16): 1556-64. doi:10.1056/NEJMsa020703.
18. EuroQol Group. EuroQol--a new facility for the measurement of health-related quality of life. The EuroQol Group. *Health Policy* 1990; **16**(3): 199-208.
19. Swedish Association of Local Authorities and Regions. Statistik om hälso- och sjukvård samt regional utveckling 2010. 2011; : 1-216.
20. Swedish Association of Local Authorities and Regions. Kostnad per brukare: jämförelser mellan kommuner inom omsorg om äldre och personer med funktionsnedsättning : utfall 2010. 2011; : 39.
21. Transport Analysis. Special transport service and inter-municipal transport service 2010. 2011; **2011:16**.

1  
2 22. Transport Analysis. Local and regional public transport 2010. 2011;

3  
4 **2011:19.**

5  
6  
7  
8 23. Lindgren B. Costs of illness in Sweden 1964-1975. Lund, Sweden: Lund  
9  
10 University; 1981.

11  
12  
13  
14 24. Statistics Sweden. Genomsnittlig grund- och månadslön samt kvinnors lön i  
15  
16 procent av mäns lön efter sektor, yrke (SSYK), kön och ålder. År 2005-2010. ;

17  
18  
19 Available at:

20  
21  
22 <http://www.ssd.scb.se/databaser/makro/Visavar.asp?yp=tansss&xu=C9233001&omradekod=AM&huvudtabell=LonYrkeAlder4&omradetext=Arbetsmarknad&tabelltext=Genomsnittlig+grund%2D+och+m%E5nadslo%F6n+samtkvinnors+l%F6n+i+procent+av+m%E4ns+l%F6n+efter+sektor%2C+yrke+%28SSYK%29%2C+k%F6n+och+%E5lder%2E+%C5r&preskat=O&prodid=AM0110&deltabell=&deltabellnamn=Genomsnittlig+grund%2D+och+m%E5nadslo%F6n+samtkvinnors+l%F6n+i+procent+av+m%E4ns+l%F6n+efter+sektor%2C+yrke+%28SSYK%29%2C+k%F6n+och+%E5lder%2E+%C5r&innehall=Antal&starttid=2005&stopptid=2010&Fromwhere=M&lang=1&langdb=1>. Accessed 03/06, 2012.

23  
24  
25  
26  
27  
28  
29  
30  
31  
32  
33  
34  
35  
36  
37  
38  
39  
40  
41  
42  
43  
44  
45  
46  
47 25. Statistics Sweden. Mer om Arbetskostnadsindex (AKI). ; Available at:

48  
49 [http://www.scb.se/Pages/Standard\\_23066.aspx](http://www.scb.se/Pages/Standard_23066.aspx). Accessed 11/26, 2012.

- 1  
2  
3  
4  
5  
6  
7  
8  
9  
10  
11  
12  
13  
14  
15  
16  
17  
18  
19  
20  
21  
22  
23  
24  
25  
26  
27  
28  
29  
30  
31  
32  
33  
34  
35  
36  
37  
38  
39  
40  
41  
42  
43  
44  
45  
46  
47  
48  
49  
50  
51  
52  
53  
54  
55  
56  
57  
58  
59  
60
26. Herdman M, Gudex C, Lloyd A, et al. Development and preliminary testing of the new five-level version of EQ-5D (EQ-5D-5L). *Qual Life Res* 2011; **20**(10): 1727-36. doi:10.1007/s11136-011-9903-x.
27. EuroQol Group. EQ-5D-5L Crosswalk Value Sets. 2012; Available at: <http://www.euroqol.org/about-eq-5d/valuation-of-eq-5d/eq-5d-5l-value-sets.html>. Accessed 11/26, 2012.
28. Organisation for economic co-operation and development. PPPs and exchange rates. ; Available at: <http://stats.oecd.org/Index.aspx?DataSetCode=CPL#>. Accessed 09/24, 2012.
29. Evans DB, Edejer TT, Adam T, Lim SS. Methods to assess the costs and health effects of interventions for improving health in developing countries. *BMJ* 2005; **331**(7525): 1137-40. doi:10.1136/bmj.331.7525.1137.
30. Leuven E, Sianesi B. PSMATCH2: Stata module to perform full Mahalanobis and propensity score matching, common support graphing, and covariate imbalance testing. *Statistical Software Components* 2003; **April 2012 revision**.
31. Statistics Sweden. Svenska hälsoräkenskaper 2001-2010. ; Available at: [http://www.scb.se/Pages/ProductTables\\_231546.aspx](http://www.scb.se/Pages/ProductTables_231546.aspx). Accessed 06/28, 2012.
32. Suominen S, Koskenvuo K, Sillanmaki L, et al. Non-response in a nationwide follow-up postal survey in Finland: a register-based mortality analysis

1  
2 of respondents and non-respondents of the Health and Social Support (HeSSup)  
3  
4 Study. *BMJ Open* 2012; **2**(2): e000657. doi:10.1136/bmjopen-2011-000657.  
5  
6

7  
8 33. Morimoto T, Gandhi TK, Seger AC, Hsieh TC, Bates DW. Adverse drug  
9  
10 events and medication errors: detection and classification methods. *Qual Saf*  
11  
12 *Health Care* 2004; **13**(4): 306-14. doi:10.1136/qhc.13.4.306.  
13  
14

15  
16  
17 34. Zhu J, Stuver SO, Epstein AM, Schneider EC, Weissman JS, Weingart SN.  
18  
19 Can we rely on patients' reports of adverse events? *Med Care* 2011; **49**(10): 948-  
20  
21 55. doi:10.1097/MLR.0b013e31822047a8; 10.1097/MLR.0b013e31822047a8.  
22  
23

24  
25  
26 35. Ramsberg J, Ekelund M. Stuprörstänkande gör samhällets kostnader för  
27  
28 ohälsa onödigt höga. *Ekonomisk debatt* 2011; **39**(5): 41,53. Swedish.  
29  
30

31  
32 36. Thomas EJ, Studdert DM, Newhouse JP, Zbar B, Howard KM, Williams EJ,  
33  
34 Brennan TA. Costs of medical injuries in Utah and Colorado. *Inquiry* 1999; **36**(3):  
35  
36 255-64.  
37  
38

39  
40  
41 37. Taché SV, Sönnichsen A, Ashcroft DM. Prevalence of adverse drug events  
42  
43 in ambulatory care: a systematic review. *Ann Pharmacother* 2011; **45**(7-8): 977-  
44  
45 89. doi:10.1345/aph.1P627.  
46  
47

48  
49  
50 38. Chrischilles EA, Segar ET, Wallace RB. Self-reported adverse drug  
51  
52 reactions and related resource use. A study of community-dwelling persons 65  
53  
54 years of age and older. *Ann Intern Med* 1992; **117**(8): 634-40.  
55  
56  
57  
58  
59  
60



- 1  
2  
3  
4  
5  
6  
7  
8  
9  
10  
11  
12  
13  
14  
15  
16  
17  
18  
19  
20  
21  
22  
23  
24  
25  
26  
27  
28  
29  
30  
31  
32  
33  
34  
35  
36  
37  
38  
39  
40  
41  
42  
43  
44  
45  
46  
47  
48  
49  
50  
51  
52  
53  
54  
55  
56  
57  
58  
59  
60
39. Gautier S, Bachelet H, Bordet R, Caron J. The cost of adverse drug reactions. *Expert Opin Pharmacother* 2003; **4**(3): 319-26.
40. Burton MM, Hope C, Murray MD, Hui S, Overhage JM. The cost of adverse drug events in ambulatory care. *AMIA Annu Symp Proc* 2007; : 90-3.
41. Borg S, Persson U, Odegaard K, Berglund G, Nilsson JA, Nilsson PM. Obesity, survival, and hospital costs-findings from a screening project in Sweden. *Value Health* 2005; **8**(5): 562-71. doi:10.1111/j.1524-4733.2005.00048.x.
42. Lundkvist J, Jönsson B. Pharmacoeconomics of adverse drug reactions. *Fundam Clin Pharmacol* 2004; **18**(3): 275-80.

**TITLE**

Cost-of-Illness of patient-reported Adverse Drug Events – A population-based cross-sectional survey

**Authors**

Hanna Gyllensten, doctoral student (**corresponding author**)  
Nordic School of Public Health NHV, Box 121 33, SE-402 42 Gothenburg, Sweden  
Phone: +46-31-693925  
Fax: +46-31-691777

Clas Rehnberg, Professor  
Department of Learning, Informatics, Management and Ethics – LIME, Karolinska Institutet, Stockholm, Sweden

Anna K. Jönsson, PhD  
Department of Drug Research/Clinical Pharmacology, Faculty of Health Sciences, Linköping University, Linköping, Sweden, and Department of Clinical Pharmacology, County Council of Östergötland, Linköping, Sweden

Max Petzold, Professor  
Akademistatistik – Centre for applied biostatistics, Sahlgrenska academy, University of Gothenburg, Department of Public Health and Community Medicine, Gothenburg, Sweden

Anders Carlsten, Associate professor  
Nordic School of Public Health NHV, Gothenburg, Sweden, and  
Medical Products Agency, Uppsala, Sweden

Karolina Andersson Sundell, Associate professor  
Nordic School of Public Health NHV, Gothenburg, Sweden, and  
Unit of Social Medicine, Department of Public Health and Community Medicine, Sahlgrenska Academy, University of Gothenburg, Gothenburg, Sweden

**Keywords**

adverse drug event  
drug therapy  
cost of illness  
quality of life  
survey

**Word count:** 4782 (excl. tables and figures)

## ABSTRACT

### Objectives

To estimate the cost-of-illness (COI) of individuals with self-reported adverse drug events (ADE) from a societal perspective and to compare these estimates with the COI for individuals without ADE. Furthermore, to estimate the direct costs resulting from two ADE-categories, adverse drug reactions (ADR) and sub-therapeutic effects of medication therapy (STE).

### Design

Cross-sectional study

### Setting

The adult Swedish general population

### Participants

The survey was distributed to a random sample of 14,000 Swedish residents aged 18 years and older, of which 7,099 responded, 1,377 reported at least one ADE and 943 reported an ADR or STE.

### Main outcome measures

Societal COI, including direct and indirect costs, for individuals with at least one self-reported ADE, and the direct costs for prescription drugs and healthcare use resulting from self-reported ADRs and STEs, were estimated during 30 days using a bottom-up approach.

### Results

The economic burden for individuals with ADEs were (95% confidence interval) 442.7 to 599.8 international dollars (Int\$) of which direct costs were Int\$ 279.6 to 420.0 (67.1%), and indirect costs were Int\$ 143.0 to 199.8 (32.9%). The average COI was higher among those reporting ADEs compared to other respondents (COI: Int\$ 185.8 to 231.2). The COI of respondents reporting at least one ADR or STE was Int\$ 468.9 to 652.9. Direct costs resulting from ADRs or STEs were Int\$ 15.0 to 48.4. The reported resource use occurred both in hospitals and outside in primary care.

### Conclusions

Self-reported ADRs and STEs cause resource use both in hospitals and in primary care. Moreover, ADEs seem to be associated with high overall COI from a societal perspective, when comparing respondents with and without ADEs. There is a need to further examine this relationship, and to study the indirect costs resulting from ADEs.

## ARTICLE SUMMARY

### Article focus

- Adverse drug events have been reported not only to cause harm but also cause resource use from patients attending hospitals.
- Even though adverse drug events have been identified also outside hospitals, little is known about the associated resource use.
- Thus we conducted a population-based survey to identify the economic burden of diseases in individuals with adverse drug events and compare to those without adverse drug events.

### Key messages

- Our study suggests high overall costs of illness for individuals with self-reported adverse drug events, estimated to 8,871 million more than 500 international dollars annually per person monthly in Sweden when including those with adverse drug reactions, drug dependence, drug intoxications, sub-therapeutic effects of medication therapy and untreated indications.
- The estimated annual direct costs for prescribed drugs and healthcare use resulting from treatment of two of the adverse drug event categories, i.e. adverse drug reactions and sub-therapeutic effects of medication therapy, were 370 million<sup>30</sup> international dollars per person monthly. This corresponds to more than 10% of all costs for prescribed drugs and healthcare use among these individuals.
- A large proportion (56%) of the healthcare resource use in respondents with adverse drug events occurred in the outpatient setting.

### Strengths and limitations of this study

- The main strength is the population-based design, including outpatient and inpatient healthcare, drug use, social services and transportation, lost productivity from both respondents and relatives, and health-related quality of life.
- The main limitation of the study is the response rate (50%), where some groups were somewhat underrepresented in the analysis.

## INTRODUCTION

Adverse drug events (ADEs), “an injury resulting from medical intervention related to a drug”,<sup>1</sup> have been identified as a public health problem that causes harm to patients and considerable resource use. According to previous research, 5-6 % of hospitalizations are drug-related,<sup>2,3</sup> and hospitalized patients experiencing adverse drug effects cause additional hospital costs of USD 2284-5640 per patient (in 2000 values).<sup>4</sup> Little is known about the corresponding costs outside hospitals,<sup>4,5</sup> or the magnitude of the problem in the general public, although patient-reported adverse drug reactions (ADR) have been reported to affect 6% of the Swedish population.<sup>6</sup>

The cost-of-illness (COI) is the economic burden of disease or diseases to the society. The distribution of ~~the~~ cost items in the COI ~~could~~ can be used to judge the financial relevance of a specific health issue in relation to other public health problems, and to study the development of the associated resource use over time for different actors in the healthcare system-~~study the development of the associated resource use over time~~.<sup>7</sup> Information about COI could also be useful for developing future intervention studies to address ADEs and to retrieve the costs for modelling e.g. cost-effectiveness of drug use in the general public.

Thus, we conducted a population-based survey to study self-reported ADEs. In ADEs we included ADRs, sub-therapeutic effects of medication therapy (STE), drug dependence, drug intoxications and untreated indications. This deviates from common ADE inclusions used in many previous studies, focusing on ADRs and medication errors,<sup>3</sup> but were developed from exploring also e.g. drug-related problems that may cause drug-related morbidity. The aim of the current study was to estimate and compare the COI of individuals with and without self-reported ADEs, from a societal perspective. A secondary aim was to estimate the direct costs resulting from two ADE-categories, ADRs and STEs. Additional results for prevalence and preventability of self-reported ADEs are

1 reported elsewhere.<sup>8</sup>

## 2 3 4 5 **METHODS**

### 6 7 8 **Study design**

9  
10 We conducted a population-based observational retrospective COI study of self-reported ADEs  
11 from a cross-sectional survey. The COI was prevalence-based and measured from a societal  
12 perspective, including direct and indirect costs during the 30 days study period. Costs were  
13 measured using a bottom-up approach using unit costs for self-reported resource use and  
14 productivity loss from short-term sick-leave and informal care. Intangibles were approximated  
15 using health-related quality of life.

### 16 17 18 19 20 21 22 23 24 25 26 **ADE definitions**

27  
28 The terminology within patient safety related to drug therapy varies.<sup>9,10</sup> ADEs have e.g. been  
29 defined as events that occur during drug treatment without a causal relationship to the drug,<sup>11</sup> or  
30 according the definition used in this study,<sup>1</sup> that indicates a relationship between the treatment and  
31 the negative outcome. From a public health perspective, there is a need to describe the  
32 epidemiology and negative consequences of drug therapy, as a complement to measures of its  
33 beneficial effects. ADR reporting has recently been expanded to all *suspected ADRs*, including  
34 overdose, misuse, abuse, medication errors, and reactions associated with occupational exposure.<sup>12</sup>  
35 Thus the reporting now includes both adverse effects occurring at normal doses and the  
36 consequences of errors. Still, there are other pathways for which drug treatment may cause harm.  
37 Examples are drug dependence,<sup>13</sup> and insufficient effect of medicines that may occur also at normal  
38 doses (often referred to as non-responders to the medication).<sup>14</sup> Moreover, untreated indication has  
39 been suggested to cause e.g. drug-related hospitalisations.<sup>15</sup> Part of these events will be weighed  
40 into the decision to initiate drug treatment.

All ADEs included in this study were self-reported, thus we included preventable and non-preventable ADRs, STE, drug dependence, drug intoxications and untreated indications, as reported by the drug users. Due to data constraints, it was unfeasible to perform a formal causality assessment for the cases, although reported ADEs were examined to exclude obvious deviations from our aim (e.g. drug dependence reported for hypertension treatments). The categories were selected to be mutually exclusive, and clarified in the questionnaire: ADRs were described as side-effects, STEs were less effect than expected, drug dependence were explained by the inability to stop using the medication, drug intoxications were associated with using too much of the medication, and untreated indications were symptoms for which the respondent considered he or she would have needed drug treatment. Only reported drug dependence associated with addictive medications were included in the final analyses.

### **Participants and data collection**

A random sample of 14,000 Swedish residents aged 18 years or older was identified by Statistics Sweden from the Swedish adult population (7,382,226 individuals) on January 1<sup>st</sup> 2010. The sample size was calculated by assuming a one-month prevalence of 6.4% for ADRs in Sweden based on a previous study,<sup>6</sup> a preventable proportion of approximately 10%,<sup>16,17</sup> a 60% response rate,<sup>6</sup> and a maximum width of  $\pm 0.3\%$  for the 95% confidence interval of the preventable proportion. The estimated sample size (7,013) was doubled to enable analyses of predictors and costs. The cross sectional postal survey was sent in the first week of October 2010. Statistics Sweden distributed the surveys and collected the responses. The envelope contained a letter with information relevant for the informed consent, the questionnaire, and a prepaid envelope for returning the questionnaire. Three reminders were sent, one postcard and two with questionnaires. Data collection was closed February 1<sup>st</sup> 2011.

The questionnaire encompassed, for the past 30 days, questions on use of healthcare and social

1 services; use of prescribed and over-the-counter medicines (OTC) as well as herbal remedies;  
2  
3 experienced ADEs; and perceived preventability, consequences and use of healthcare due to ADRs  
4  
5 and STEs. The questions of resource use after ADRs or STEs were: Overall, how were you affected  
6  
7 by [ADR/STE] during the last 30 days: [seven check boxes for alternative effects]? If you indicated  
8  
9 any of [three selected check boxes]: how many days [were you unable to conduct your leisure  
10  
11 activities / did you stay home from work or equivalent / did you have help from relatives to conduct  
12  
13 everyday activities]? How many times during the last 30 days did you have any of the following  
14  
15 [healthcare] contacts due to [ADR/STE]: [ten types of healthcare encounters indicated, free text  
16  
17 space and a check box for those not having had healthcare contacts]? Have your treatment/s been  
18  
19 adjusted due to [ADR/STE] during the last 30 days: Yes, a new drug treatment was initiated, with  
20  
21 [free text box to indicate drug]; Yes, existing drug treatment was changed, e.g. stopped or dose  
22  
23 adjustment; Yes, a new other treatment was initiated (e.g. lifestyle change, surgery/orthopaedic  
24  
25 treatment), namely [free text box to indicate treatment]; No, the treatment was not changed? The  
26  
27  
28  
29  
30  
31  
32  
33  
34  
35  
36  
37  
38  
39  
40  
41  
42  
43  
44  
45  
46  
47  
48  
49  
50  
51  
52  
53  
54  
55  
56  
57  
58  
59  
60

questionnaire also included demographic and socioeconomic characteristics, and the EQ-5D questionnaire for health-related quality of life<sup>18</sup>. The questionnaire was piloted with healthcare professionals, individuals from the general public and specific patient groups. All reported ADEs were carefully examined by one of the researchers, a pharmacist (Katja M. Hakkarainen), and cross-examined, to exclude responses not indicating a suspected symptom or drug. The first author, HG, also a pharmacist with clinical experience, did an independent examination of 10% of reported ADEs. Differences in opinion were discussed in the research group to reach consensus.

Data from the questionnaire was combined with register data by record linkage using each respondent's unique personal identification number, by Statistics Sweden. The register data included demographic and socioeconomic variables from the Longitudinal Integration Database for Health Insurance and Labour Market Studies from Statistics Sweden; sick-leave and disability pension from the Swedish Social Insurance Agency; as well as filled prescriptions from the Swedish



1 Prescribed Drug Register and hospitalisations from the Swedish Patient Register, the last two are  
2  
3 held by the National Board of Health and Welfare.  
4  
5  
6  
7

### 8 **Direct costs**

9  
10 Direct costs included used resources: i.e. costs resulting from prescription drugs, healthcare, social  
11 services and transportation. Direct costs resulting from ADRs or STEs included the costs for  
12  
13 prescription drugs and healthcare use caused by either ADRs or STEs reported by the respondents.  
14  
15

16  
17  
18  
19 Dispensed prescription medicines and associated costs were retrieved from the Swedish Prescribed  
20 Drug Register, National Board of Health and Welfare. Costs included both patient co-payments and  
21 expenses for medicines, and costs paid by the reimbursement scheme. The prescription drug cost  
22 during the study period was the average cost per month calculated from the 2010 annual  
23  
24  
25  
26  
27  
28  
29  
30  
31  
32  
33  
34  
35  
36  
37  
38  
39  
40  
41  
42  
43  
44  
45  
46  
47  
48  
49  
50  
51  
52  
53  
54  
55  
56  
57  
58  
59  
60  
were the cost of any medicine reported ~~in~~ by the survey respondents to be initiated for treating an  
ADR or STE ~~and, that was~~ dispensed during the study period according to data from the Swedish  
Prescribed Drug Register. Costs for adjustments to the drug treatment related to e.g. drugs  
administered from healthcare units, initiation of drug treatment for which the individual already had  
the medication, initiation of a prescription that was not filled during the period for which we had  
register data, initiation of over the counter drugs or herbal remedies that are not registered, dose  
adjustments, and termination of drug treatment were excluded.

Healthcare use, both overall healthcare use and encounters resulting from ADRs or STEs, were  
retrieved from the questionnaire, i.e. self-reported by the respondents. Results from pre-specified  
questions and from free text were categorized into: phone calls, nurse visits, outpatient physician  
visits, home healthcare, specialist physician and emergency department visits, visits to other  
healthcare personnel in somatic care, psychiatrist visits, visits to other healthcare personnel in

1 psychiatric care, and hospitalizations. Encounters for healthcare use of relatives, and respondent's  
2 donations of blood or tissues, were not included in respondents' healthcare use. Unit costs of  
3 healthcare services were based on national statistics on healthcare use and costs.<sup>19</sup> A visit to other  
4 healthcare personnel than physicians was weighted as 40% of the cost of a physician visit. Phone  
5 calls were weighted as 1/3 of the cost of visiting a nurse, and home healthcare as 2 times the cost of  
6 a nurse visit. Costs paid by the patient were not included in the healthcare costs (2.3% of the  
7 proceeds to the healthcare producers<sup>19</sup>).

8  
9  
10  
11  
12  
13  
14  
15  
16  
17  
18  
19  
20  
21  
22  
23  
24  
25  
26  
27  
28  
29  
30  
31  
32  
33  
34  
35  
36  
37  
38  
39  
40  
41  
42  
43  
44  
45  
46  
47  
48  
49  
50  
51  
52  
53  
54  
55  
56  
57  
58  
59  
60

Costs for social services included nursing home stay and home-help services reported in the questionnaire. Transportation costs included reported transportation for the disabled and other transportation for healthcare encounters, identified from the questionnaire. Costs for overall use of social services and transportation were based on national statistics.<sup>20-22</sup>

### Indirect costs

Indirect costs included costs resulting from lost productivity for the respondent due to self-reported short-term morbidity (sick-leave) and of relatives to the respondents' due to informal care.<sup>7</sup> Sick-leave below two weeks is not reported in the Social Insurance Agency's register. Because of the study design, it was not possible to identify deaths during the study period, and there were no respondents initiating disability pension during the study period, therefore no future indirect costs were estimated.<sup>23</sup> In addition, productivity loss due to reported long-term sick-leave (among those <70 years) and disability pension (among those <65 years) was calculated. Lost productivity Sick-leave and disability pension during the study period was were identified from the questionnaire. Costs and the costs for lost productivity were measured with by the human capital approach,<sup>7</sup> using national wages statistics and social security contributions.<sup>24,25</sup>

### Additional resource use and intangibles

1  
2  
3  
4  
5  
6  
7  
8  
9  
10  
11  
12  
13  
14  
15  
16  
17  
18  
19  
20  
21  
22  
23  
24  
25  
26  
27  
28  
29  
30  
31  
32  
33  
34  
35  
36  
37  
38  
39  
40  
41  
42  
43  
44  
45  
46  
47  
48  
49  
50  
51  
52  
53  
54  
55  
56  
57  
58  
59  
60

Visits to dental care and pharmacies, and lost leisure time, were reported descriptively. In addition to the estimated costs for healthcare and drug use, resource use resulting from ADRs and STEs was reported descriptively; including changes to drug therapy not identified as a dispensed medicine in the register during the study period, days of lost leisure time, patients' sick-leave and relatives' informal care. Intangible costs were omitted in the cost analysis, but pain and suffering was approximated by the respondents' health-related quality of life using EQ-5D-5L ([the EuroQol Group's five dimension health state questionnaire with five levels of severity](#)) and the UK value sets.<sup>26,27</sup> [The EQ-5D-5L is a generic health-related quality of life instrument with five dimensions: mobility, self-care, usual activities, pain/discomfort, and anxiety/depression. Each dimension has five levels of severity: no problems/slight problems/moderate problems/severe problems/extreme problems. The responses for each dimension created a health profile for each respondent, that was transferred using the stated value set to the respondents' EQ-5D index value: ranging from dead \(=0\) to full health \(=1\). The EQ-5D-5L responses were complemented with results from the EQ-VAS scale \(the EuroQol Group's visual analogue scale\): from 'Worst imaginable health state' \(=0\) to 'best imaginable health state' \(=100\).](#)

### Analyses

Respondents' characteristics were compared to the non-respondents, and compared based on ADE status (table 1), using register data for: age (young adults age 18-34, middle aged 35-64 years old, or individuals above the Swedish retirement age  $\geq 65$  years old), country of birth (Sweden or other than Sweden), educational level (mandatory education, intermediate education, i.e. high school and up to two years of university education, or high education, i.e. more than two years of university education), income during 2009, marital status, and sex. Main occupation was interpreted from survey responses for occupations, age and income data during 2009. Differences in characteristics were tested for statistical significance (at  $p < 0.05$ ), for respondents with or without ADEs, using chi square tests.

**Table 1. Description of the study population and comparison with non-respondents.**

|                                                          | Respondents<br>reporting ADE | Respondents not<br>reporting ADE | All respondents        | Non-<br>respondents    |
|----------------------------------------------------------|------------------------------|----------------------------------|------------------------|------------------------|
|                                                          | Total = 1,377<br>N (%)       | Total = 5,722<br>N (%)           | Total = 7,099<br>N (%) | Total = 6,832<br>N (%) |
| <b>Age<sup>#</sup></b>                                   |                              |                                  |                        |                        |
| 18 – 34 years                                            | 294(21.4)                    | 1036(18.1)                       | 1330(18.7)             | 2328(34.1)             |
| 35 – 64 years                                            | 675(49.0)                    | 2935(51.3)                       | 3610(50.9)             | 3357(49.1)             |
| 65 – years                                               | 408(29.6)                    | 1751(30.6)                       | 2159(30.4)             | 1147(16.8)             |
| <b>Sex<sup>#</sup></b>                                   |                              |                                  |                        |                        |
| Men                                                      | 528(38.3)                    | 2732(47.7)                       | 3260(45.9)             | 3715(54.4)             |
| Women                                                    | 849(61.7)                    | 2990(52.3)                       | 3839(54.1)             | 3117(45.6)             |
| <b>Country of birth</b>                                  |                              |                                  |                        |                        |
| Sweden                                                   | 1218 (88.5)                  | 1276 (92.7)                      | 6280(88.5)             | 5328(78.0)             |
| Other than Sweden                                        | 159 (11.5)                   | 101 (7.3)                        | 819(11.5)              | 1504(22.0)             |
| <b>Marital status</b>                                    |                              |                                  |                        |                        |
| Single                                                   | 457(33.2)                    | 1774(31.0)                       | 2231(31.4)             | 3226(47.2)             |
| Married or registered<br>partnership                     | 633(46.0)                    | 2872(50.2)                       | 3505(49.4)             | 2424(35.5)             |
| Divorced                                                 | 188(13.7)                    | 681(11.9)                        | 869(12.2)              | 802(11.7)              |
| Widowed                                                  | 99(7.2)                      | 395(6.9)                         | 494(7.0)               | 380(5.6)               |
| <b>Education<sup>**</sup></b>                            |                              |                                  |                        |                        |
| Mandatory education                                      | 240(17.6)                    | 1144(20.1)                       | 1499(21.1)             | 1804(26.4)             |
| Intermediate education                                   | 655(48.0)                    | 2840(49.9)                       | 3438(48.4)             | 3483(51.0)             |
| High education                                           | 471(34.5)                    | 1706(30.0)                       | 2115(29.8)             | 1342(19.6)             |
| <b>Main occupation<sup>#†</sup></b>                      |                              |                                  |                        |                        |
| Employee                                                 | 584(43.0)                    | 2783(49.0)                       | 3367(47.8)             | NA                     |
| Company owner                                            | 58(4.3)                      | 351(6.2)                         | 409(5.8)               | NA                     |
| Student                                                  | 81(6.0)                      | 290(5.1)                         | 371(5.3)               | NA                     |
| Retired                                                  | 391(28.8)                    | 1697(29.9)                       | 2088(29.7)             | NA                     |
| On long-term sickness<br>absence or disability pensioner | 131(9.7)                     | 202(3.6)                         | 333(4.7)               | NA                     |
| Other                                                    | 112(8.3)                     | 359(6.3)                         | 471(6.7)               | NA                     |
| <b>Income in 2009<sup>#</sup></b>                        |                              |                                  |                        |                        |
| Int\$ ≤ 13,848                                           | 322(23.4)                    | 1046(18.3)                       | 1368(19.3)             | 2248(32.9)             |
| Int\$ 13,848-22,490                                      | 299(21.7)                    | 1162(20.3)                       | 1461(20.6)             | 1267(18.5)             |
| Int\$ 22,490-30,245                                      | 290(21.1)                    | 1192(20.8)                       | 1482(20.9)             | 1279(18.7)             |
| Int\$ 30,245-39,661                                      | 259(18.8)                    | 1235(21.6)                       | 1494(21.0)             | 1109(16.2)             |
| Int\$ 39,662 ≥                                           | 207(15.0)                    | 1087(19.0)                       | 1294(18.2)             | 929(13.6)              |

Resource use quantities, percentages and costs are rounded.

<sup>#</sup> Statistically significant difference between respondents with/without ADEs ( $p < 0.05$ ).

<sup>\*</sup> Educational level was missing for 47 of the respondents (0.7%), of which 11 were ADE cases, and 203 of the non-respondents (3.0%).

<sup>†</sup> Occupation was missing for 60 respondents, of which 20 were ADE cases.

Abbreviations: ADE = adverse drug events; Int\$ = international dollars; NA = not applicable.

1 All unit costs (table 2) were translated to international dollars (Int\$) using the 2010 purchasing  
2 power parity for gross domestic product (1 Int\$ = 9.026383 Swedish krona).<sup>28</sup> The Int\$ is a  
3  
4 hypothetical currency with the same purchasing power as the United States dollar (US\$) in the  
5  
6 Unites States of America, allowing for differences in price levels between countries.<sup>29</sup> Means and  
7  
8 standard deviations for direct costs, indirect costs and COI were calculated for the 30 day period.  
9  
10 Cost differences were tested for statistical significance (at  $p < 0.05$ ), for respondents with or without  
11  
12 ADEs, and for ADE-respondents with or without at least one ADRs or STEs, using a two-tailed t-  
13  
14 test with unequal variances. Cost differences and respondents' characteristics were tested for  
15  
16 statistical significance (at  $p < 0.05$ ), for respondents with at least one ADRs or STEs, using one-way  
17  
18 anova (for age categories) and a two-tailed t-test with unequal variances (for sex). ~~Extrapolated-~~  
19  
20 ~~annual direct costs, indirect costs and COI were calculated for the adult Swedish population (N =~~  
21  
22 ~~7,382,226) during 2010.~~ All statistical analyses were made using the STATA 10.1 software.  
23  
24  
25  
26  
27  
28  
29  
30  
31  
32  
33  
34  
35  
36  
37  
38  
39  
40  
41  
42  
43  
44  
45  
46  
47  
48  
49  
50  
51  
52  
53  
54  
55  
56  
57  
58  
59  
60

**Table 2. Resource use in respondents with ADEs, and unit costs for the resources.**

|                                        | <b>Respondents<br/>reporting ADE and<br/>resource use</b> | <b>Quantity of<br/>resources used</b> | <b>Unit cost</b> |
|----------------------------------------|-----------------------------------------------------------|---------------------------------------|------------------|
|                                        | Total = 1377<br>N (% of total)                            | N or hours                            | (Int\$)          |
| <b>DIRECT COSTS:</b>                   |                                                           |                                       |                  |
| <b>Dispensed medicines<sup>#</sup></b> | 1218 (88.5)                                               | 26,436                                | -                |
| <b>Healthcare use:</b>                 |                                                           |                                       |                  |
| Phone calls                            | 106 (7.7)                                                 | 267                                   | 18.5             |
| Nurse visits                           | 93 (6.8)                                                  | 182                                   | 55.4             |
| Physicians visits                      | 92 (6.7)                                                  | 124                                   | 138.6            |
| Specialist physician and ED visits     | 91 (6.6)                                                  | 191                                   | 313.0            |
| Home healthcare                        | 6 (0.4)                                                   | 39                                    | 110.9            |
| Other somatic visits                   | 52 (3.8)                                                  | 159                                   | 55.4             |
| Psychiatrist visits                    | 4 (0.3)                                                   | 4                                     | 407.5            |
| Other psychiatric visits               | 49 (3.6)                                                  | 120                                   | 163.0            |
| Hospitalizations                       | 16 (1.2)                                                  | 20                                    | 5036.7           |
| <b>Social services:</b>                |                                                           |                                       |                  |
| Home-help services                     | 52 (3.8)                                                  | 1851                                  | 45.7             |
| Nursing homes                          | 19 (1.4)                                                  | 480                                   | 173.9            |
| <b>Transportation:</b>                 |                                                           |                                       |                  |
| Services for disabled                  | 38 (2.8)                                                  | 420                                   | 29.8             |
| Other transportation                   | 240 (17.4)                                                | 2793                                  | 2.5              |
| <b>INDIRECT COSTS:</b>                 |                                                           |                                       |                  |
| <b>Sick-leave (by age):</b>            |                                                           |                                       |                  |
| 18-24 years                            | 24 (23.1)                                                 | 1000                                  | 12.1*            |
| 25-34 years                            | 35 (18.4)                                                 | 1690                                  | 15.7*            |
| 35-44 years                            | 36 (19.1)                                                 | 1852                                  | 18.2*            |
| 45-54 years                            | 29 (13.0)                                                 | 1186                                  | 18.5*            |
| 55+ years                              | 39 (5.8)                                                  | 2062                                  | 18.2*            |
| <b>Informal care</b>                   | <b>228 (16.6)</b>                                         | <b>2871</b>                           | <b>17.2*</b>     |

Resource use quantities, percentages and costs are rounded.

<sup>#</sup> Based on register data.

\* The unit cost indicated was the average wage per hour in each age group<sup>24</sup>, which was then multiplied by the general payroll tax. For citizens <26 years of age the general payroll tax was 15.49% and for citizens ≥26 years of age it was 31.42%.<sup>25</sup> For the informal care, the indicated unit cost was the average wage per hour, which was then multiplied by the general payroll tax for citizen's ≥26 years of age.

Abbreviations: ADE = adverse drug events; ED = emergency department; Int\$ = international dollars; N = number; NA = not applicable; Q = quartile.

## Sensitivity analyses

Sensitivity analyses were made based on available register data for hospitalizations and respondents' lost productivity from sick-leave. ~~Moreover, an additional extrapolation to the annual COI in the Swedish population was made, under the assumption that all ADEs and resource use in the study population was reported by the respondents, thus assuming that non-respondents had no ADEs or resource use. Because of the~~ Due to skewed data, ~~with resources corresponding to~~ 80% of the direct costs for respondents with ADEs were reported by 10% of these respondents (figure 1), a ~~proposed~~ sensitivity analysis proposed in the research plan, based on interquartile range of responses, in the research plan, was unachievable. Propensity score matching and analyses were conducted to estimate the direct healthcare costs and indirect costs (excluding informal care), respectively, attributable to ADEs. Propensity scores were calculated by logistic regression from respondent ADE status and characteristics (age, sex country of birth, educational level, main occupation, income category, and self-reported prescription drug use). Single nearest neighbour matching with calipers (0.01) and without replacement was made using the Psmatch2 module for STATA. <sup>30</sup> The matching resulted in 1362 pairs of respondents (excluding 15 respondents reporting ADE), each respondent with self-reported ADEs matched by the estimated propensity scores to a respondent without ADE, for whom costs were compared. Additional changes from the research plan were limited to how results were reported.

**Figure 1: Accumulated direct costs of individuals with self-reported ADEs, including the subgroup reporting ADRs or STEs.**

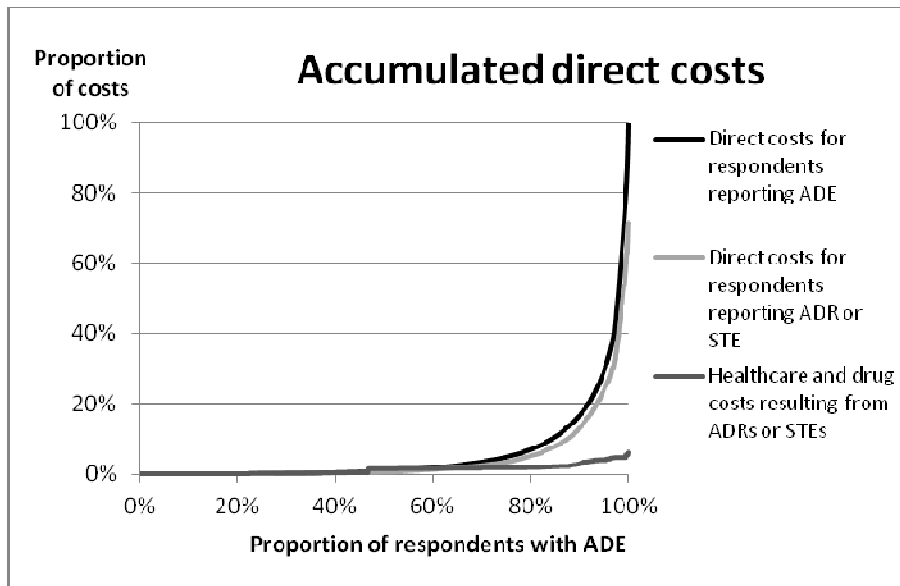

Abbreviations: ADE = adverse drug events; ADR = adverse drug reaction; STE = sub-therapeutic effect of medication therapy.

Peer review only



## RESULTS

A total of 7,099 questionnaires were collected (response rate 51 %). At least one ADE was reported by 1,377 (19.4%) respondents. Of these, 68.5% (943 respondents), reported at least one ADR or STE. There were statistically significant differences in age ( $p < 0.05$ ), sex ( $p < 0.001$ ), education ( $p < 0.01$ ), main occupation ( $p < 0.001$ ), and income ( $p < 0.001$ ), comparing respondents reporting at least one ADE compared to other respondents (table 1). Resource use for respondents with self-reported ADE is presented in table 2. Healthcare was attended by 239 (17.4%) of respondents reporting ADEs, of which 96 (40.2%) were hospitalized or visited a specialist physician (including psychiatrist visits). Among all respondents, 717 (10.1%) attended healthcare. Resource use among respondents with ADE included also outpatient care in hospitals with other healthcare personnel and primary care visits (e.g. nurse visits and physician visits). In addition, home-help services or a nursing home was attended by 51 (4.5%), of the 1,138 respondents with ADE that did not attend healthcare, while 164 (14.4%) reported informal care and 131 (11.5%) had stayed home from work.

The economic burden for individuals with self-reported ADEs were (mean  $\pm$  standard deviation, 95% confidence interval) Int\$ 521.2  $\pm$  1,485.7, Int\$ 442.7 to 599.8, of which direct costs were measured at Int\$ 349.8  $\pm$  1,328.7, Int\$ 279.6 to 420.0 (67.1%) and indirect costs were Int\$ 171.4  $\pm$  537.1, Int\$ 143.0 to 199.8 (32.9%) (table 3 and figure 2). The average COI was higher among those reporting ADEs compared to respondents without ADEs (COI: Int\$ 208.5  $\pm$  876.3, Int\$ 185.8 to 231.2) ( $p < 0.001$ ). Productivity loss due to long-term sick-leave and disability pension increased the indirect costs by Int\$ 353.5  $\pm$  1,149.6 for those with self-reported ADEs and Int\$ 133.0  $\pm$  728.5 for other respondents ( $p < 0.001$ ). The COI of respondents with ADR or STE was Int\$ 560.9  $\pm$  1,439.8, Int\$ 468.9 to 652.9. ~~Extrapolated to the Swedish population, the annual direct costs, indirect costs and COI of individuals with ADE were: Int\$ 5,953.4 million, Int\$ 2,917.5 million, and Int\$ 8,870.9 million, respectively (figure 3).~~ Resource use among respondents with self-

1  
2 | reported ADEs, or resulting from ADRs or STEs, occurred both in hospitals and outside of hospital  
3  
4 in primary care. For respondents with ADEs, 12% of the healthcare costs originated from primary  
5  
6 care nurse or general practitioner visits, while the remaining costs were equally distributed to other  
7  
8 outpatient care (44%) and hospitalisations (44%), while the proportions were: 15%, 44% and 41%,  
9  
10 among all respondents.  
11  
12  
13  
14  
15  
16  
17  
18  
19  
20  
21  
22  
23  
24  
25  
26  
27  
28  
29  
30  
31  
32  
33  
34  
35  
36  
37  
38  
39  
40  
41  
42  
43  
44  
45  
46  
47  
48  
49  
50  
51  
52  
53  
54  
55  
56  
57  
58  
59  
60

For peer review only

**Table 3. Average cost-of-illness for patients with and without self-reported ADEs.**

|                                                       | <b>COI<br/>with ADE</b> | <b>COI<br/>without ADE</b> |
|-------------------------------------------------------|-------------------------|----------------------------|
|                                                       | N = 1377                | N = 5722                   |
|                                                       | average ± SD            | average ± SD               |
| Dispensed prescription medicines (Int\$) <sup>#</sup> | 48.6 ± 119.0            | 24.7 ± 103.3               |
| Healthcare use (Int\$) <sup>#</sup>                   | 164.9 ± 935.3           | 40.1 ± 360.7               |
| Social services (Int\$)                               | 122.1 ± 778.8           | 83.6 ± 673.5               |
| Transportation (Int\$) <sup>#</sup>                   | 14.3 ± 84.8             | 6.9 ± 67.2                 |
| <b>Total direct cost (Int\$)<sup>#</sup></b>          | <b>349.8 ± 1,328.7</b>  | <b>155.2 ± 805.3</b>       |
| Productivity loss, sick-leave (Int\$) <sup>#</sup>    | 124.4 ± 496.2           | 41.1 ± 272.8               |
| Informal care <sup>†</sup> (Int\$) <sup>#</sup>       | 47.1 ± 187.0            | 12.1 ± 89.3                |
| <b>Total indirect cost (Int\$)<sup>#</sup></b>        | <b>171.4 ± 537.1</b>    | <b>53.3 ± 290.9</b>        |
| <b>COST-OF-ILLNESS (Int\$)<sup>#</sup></b>            | <b>521.2 ± 1,485.7</b>  | <b>208.5 ± 876.3</b>       |
| <b>Other resource use:</b>                            |                         |                            |
| Over-the-counter drugs, number                        | 1.6 ± 1.5               | 1.0 ± 1.9                  |
| Natural remedies, number                              | 0.5 ± 1.0               | 0.3 ± 1.2                  |
| Lost leisure time, days                               | 3.7 ± 7.8               | 1.0 ± 4.2                  |
| Prevalent disability pension, n (%)                   | 135 (9.8)               | 242 (4.2)                  |
| EQ-5D <sup>TM</sup> index value                       | 0.71 ± 0.22             | 0.84 ± 0.18                |
| Self-rated health by EQ-VAS                           | 69.8 ± 20.7             | 81.2 ± 16.9                |

Resource use quantities, percentages and costs are rounded.

<sup>#</sup> Statistically significant cost difference between respondents with/without ADEs (p<0.05).

<sup>†</sup> Of the 546 respondents reporting informal care, 56 respondents were excluded from the analyses since the amount of care (days and hours) was not reported.

Abbreviations: ADE = adverse drug events; EQ-5D<sup>TM</sup> = The EuroQol Group's five dimension health state questionnaire with five levels of severity; EQ-VAS = The EuroQol Group's visual analogue scale; Int\$ = international dollars; N = population size; SD = standard deviation.

**Figure 2: The average monthly cost-of-illness of respondents based on reported ADE-status and healthcare attendance, divided into direct and indirect costs.**

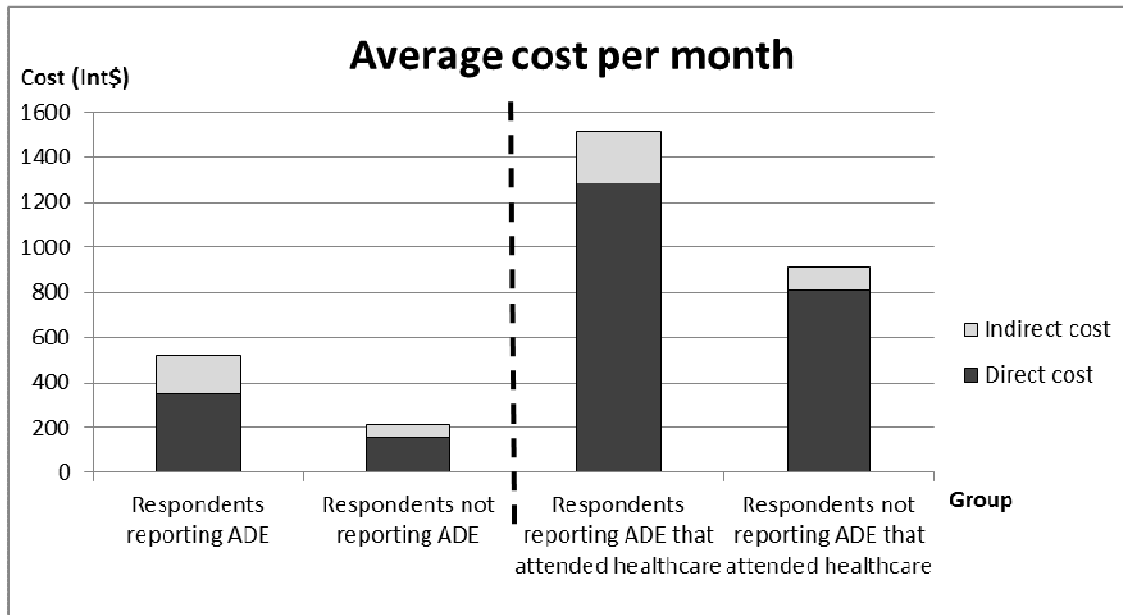

Abbreviations: ADE = adverse drug events; Int\$ = international dollars.

**Figure 3: The annual cost-of-illness during 2010, extrapolated to the Swedish adult population, divided into direct and indirect costs.**

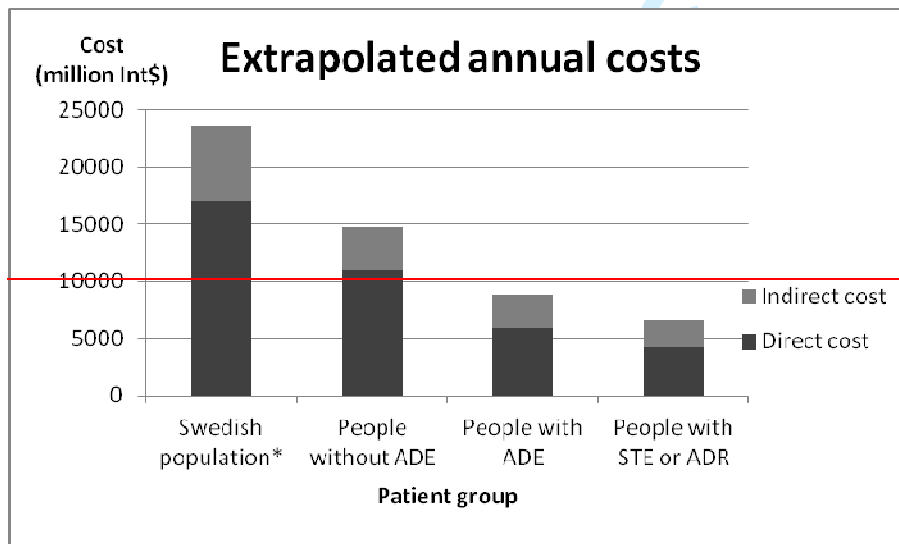

\* Summary measure for all individuals with and without ADEs.

Abbreviations: ADE = adverse drug events; Int\$ = international dollars.

Among all respondents with at least one [self-reported](#) ADR or STE, the average direct costs resulting from ADRs and STEs were Int\$ 31.7 ± 8.5, Int\$ 15.0 to 48.4. The resulting costs correspond to 8.7% of the direct costs and 12.5% of the costs of prescription drugs and healthcare use for those with ADRs or STEs. The average direct costs resulting from ADRs were Int\$ 0.5 ± 4.1 for prescription drugs and Int\$ 17.3 ± 159.0 for healthcare use, for those with ADRs. For STEs the average direct costs were Int\$ 1.4 ± 8.7 and Int\$ 33.9 ± 281.2, respectively. Extrapolated to the Swedish population, the annual direct costs resulting from ADRs or STEs were Int\$ 370.1 million. There were no statistically significant differences in COI for respondents with ADRs or STEs, or direct costs resulting from the ADRs or STEs, by age or sex (table 4).

**Table 4. Distribution of costs among respondents with self-reported ADRs or STEs\*, including cost-of-illness (all-cause morbidity) and direct costs resulting from self-reported ADRs or STEs.**

|                                                                             | Respondents<br>with ADR or STE<br>N (%) | Average cost-of-illness<br>for respondents<br>with ADR or STE<br>average ± SD, Int\$ | Direct cost<br>resulting from the<br>ADRs or STEs*<br>average ± SD, Int\$ |
|-----------------------------------------------------------------------------|-----------------------------------------|--------------------------------------------------------------------------------------|---------------------------------------------------------------------------|
| <b>Total resource use among the respondents with ADRs or STEs (N = 943)</b> |                                         |                                                                                      |                                                                           |
| Cost-of-illness                                                             | -                                       | 560.9 ± 1,439.8                                                                      | NA                                                                        |
| Direct costs                                                                | -                                       | (365.6 ± 1,279.4)                                                                    | NA                                                                        |
| Indirect costs                                                              | -                                       | (195.3 ± 564.7)                                                                      | NA                                                                        |
| <b>Age</b>                                                                  |                                         |                                                                                      |                                                                           |
| 18 – 34 years                                                               | 209 (22.2)                              | 556.5 ± 1,580.8                                                                      | 31.4 ± 241.7                                                              |
| 35 – 64 years                                                               | 473 (50.2)                              | 511.5 ± 1,154.4                                                                      | 41.5 ± 326.9                                                              |
| 65 – years                                                                  | 261 (27.7)                              | 653.9 ± 1,754.8                                                                      | 14.3 ± 77.3                                                               |
| <b>Sex</b>                                                                  |                                         |                                                                                      |                                                                           |
| Men                                                                         | 346 (36.7)                              | 486.4 ± 1,182.8                                                                      | 32.1 ± 232.4                                                              |
| Women                                                                       | 597 (63.3)                              | 604.0 ± 1,568.9                                                                      | 31.5 ± 276.7                                                              |
| <b>Type of ADE<sup>†</sup></b>                                              |                                         |                                                                                      |                                                                           |
| ADR                                                                         | 554 (58.7)                              | 659.0 ± 1,613.6                                                                      | 36.6 ± 290.8                                                              |
| STE                                                                         | 539 (57.2)                              | 566.0 ± 1,446.1                                                                      | 47.5 ± 335.5                                                              |
| <b>Self-reported preventability</b>                                         |                                         |                                                                                      |                                                                           |
| Preventable <sup>‡</sup>                                                    | <del>207-208</del> (22.01)              | <del>720717.9-6</del> ± 1, <del>901897.3</del>                                       | <del>5756.1-8</del> ± <del>343342.79</del>                                |
| Non-preventable                                                             | <del>736-735</del> (7877.09)            | <del>515516.9-5</del> ± 1, <del>278279.42</del>                                      | <del>24.6-7</del> ± 232.67                                                |

Percentages and costs are rounded.

# Include persons with at least one self-reported ADR or STE.

\* Include resource use reported for both ADRs and STEs.

† Categories overlap, both includes persons with at least one self-reported ADR or STE respectively.

‡ Includes persons with at least one preventable self-reported ADR or STE.

Abbreviations: ADR = adverse drug reaction; Int\$ = international dollars; N = subgroup sample size; NA = not applicable; STE = sub-therapeutic effect of medication therapy.

Additional resource use attributed to ADRs by 554 respondents, reported during the 30 days study period, included: 90 medication changes not ~~identified-registered~~ in the [Swedish Prescribed Drug Register](#), 1,448 days of lost leisure time (n = 117), 529 days of sick-leave (n = 61), and 600 days with informal care (n = 49). For STEs, additional resource use among the 539 respondents included: 116 medication changes, 2,510 days of lost leisure time (n = 187), 857 days of sick-leave (n = 88), and 1,171 days with informal care (n = 92). The health-related quality of life scores were significantly lower for respondents with ADEs compared to other respondents (figure 43): the EQ-5D™ summary estimates were  $0.84 \pm 0.18$  vs.  $0.71 \pm 0.22$  ( $p < 0.001$ ), and results from the visual analogue scale were  $69.79 \pm 20.69$  vs.  $81.17 \pm 16.94$  ( $p < 0.001$ ).

**Figure 43:** Dimensions of health-related quality of life, health profile results from the EQ-5D™ instrument, the severity reported for each domain used as 1-5 point Likert scale (from 'no problem' to 'extreme problem'), categorized based on reported ADE-status.

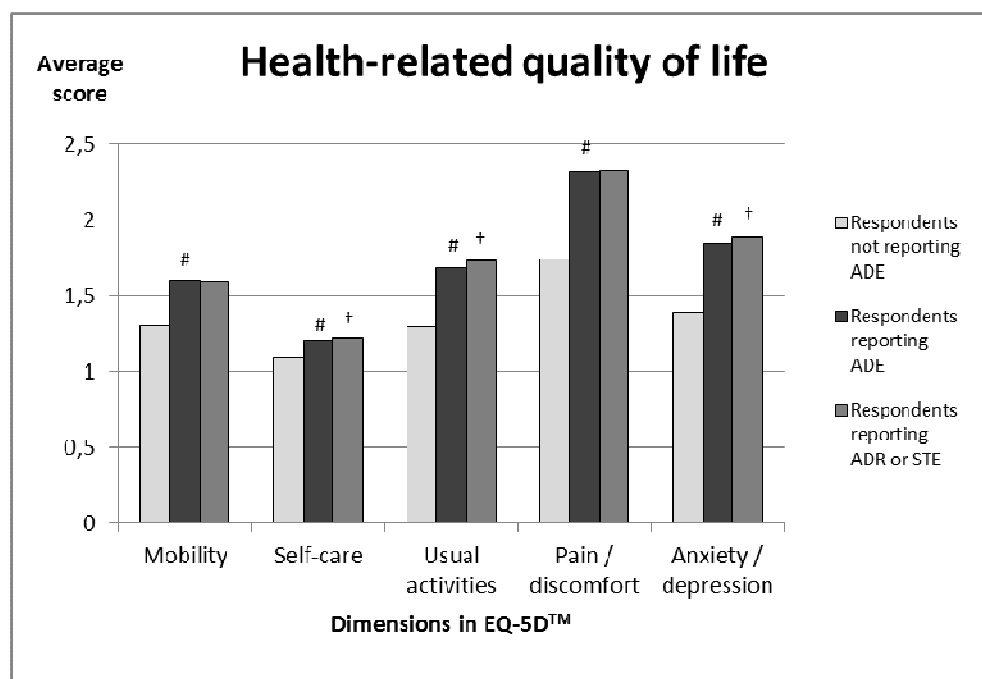

# Statistically significant difference between respondents with/without ADEs ( $p < 0.05$ ).

† Statistically significant difference between respondents with at least one ADR or STE compared to other respondents with ADEs ( $p < 0.05$ ).

Abbreviations: ADE = adverse drug events; ADR = adverse drug reaction; EQ-5D™ = The EuroQol Group's five dimension health state questionnaire with five levels of severity; STE = sub-therapeutic effect of medication therapy.

### Sensitivity analyses

The hospitalization rate reported in the survey (19 respondents reported 24 hospitalizations during the study period) was compared to the hospitalization rate identified from register data: 85 respondents had 101 hospitalizations covering a total of 365 days during the 5 weeks before answering the survey. Thus the sensitivity of the reporting of hospitalizations in the questionnaire was 59% and the specificity was 99% compared to register data. Among the 85 respondents, 24 hospitalisations lasted only one day or night, 10 hospitalisations occurred less than one week before the respondent's questionnaire was registered at Statistics Sweden, and 7 hospitalisations identified from the register were duplicate registrations based on transfers between hospitals or departments. For sick-leave, the sensitivity was 12% and the specificity was 99%, compared to register data, with 55 persons identified from both the register and the questionnaire. Of the 70 respondents identified from the register but not from the questionnaire, 25 reported to be on long-term sickness absence, seeking a job or on parental leave, 45 persons had not reported the sick-leave identified in the register. Of those 390 persons reporting sick-leave that were not identified in the register, 306 reported sick-leave of less than 2 weeks (which in Sweden is paid by the employer and is not registered), 7 had disability pension and the remaining 77 persons did not receive sickness benefit for their absence. Additional deviations were not possible to explain using available data.

According to the propensity score analyses, the attributable costs for ADEs were Int\$ 99.4 for direct healthcare costs and Int\$ 221.5 for indirect costs (excluding informal care).

~~Assuming that all ADEs and resource use in the study population was reported by our respondents, resulted in an annual COI of individuals with ADEs in the Swedish population Int\$ 746 million (direct costs: Int\$ 501 million).~~

## DISCUSSION

In this study, the societal COI of 1,377 individuals with self-reported ADEs was Int\$ 717,750.4 and the direct costs resulting from self-reported ADRs and STEs in 943 individuals was Int\$ 29,935.9.

Thus, the extrapolated annual direct costs in Sweden resulting from ADRs and STEs, was Int\$ 370 million in 2010. Our results suggest that ADEs cause costs also outside hospitals, and for patients not attending hospitals. Thus, studies limited to drug-related admission will underestimate the economic impact in society. We have also found an association between the occurrence of ADEs

and high overall COI that needs further ~~analyzing~~analysing in future studies. Those reporting ADEs were more extensive users of prescription drugs, healthcare resource use, transportation services, and informal care, compared to other respondents. Moreover, they had more short-term sick-leave and disability pension than other respondents. Much of this increase in resource use will be due to co-morbidities, and will be involved in causing the ADE, but although not quantified as costs caused by ADEs, some respondents also reported that they had experienced sick-leave, informal care and lost leisure time resulting from ADRs and STEs.

The strengths of this study include a large number of respondents. However, certain groups were underrepresented among respondents, e.g. young adults, men, and those born in another country than Sweden. It is possible that the decision to respond is associated with health status, with either severely ill patients or healthy citizens being less prone to respond. ~~Therefore we report a minimum estimation of the extrapolated annual COI for individuals with ADEs in the Swedish general public, assuming the non-respondents had no ADEs or resource use; thus were healthier than the respondents. This resulted in healthcare costs far below what was expected if compared to the annual healthcare expenditure in Sweden,<sup>31</sup> and even comparing our main analysis of extrapolated direct costs for the population, suggest that much resource use was unaccounted for in our analyses, thus we underestimate rather than overestimate the economic impact of ADEs. Moreover, p~~previous



1 research suggests the bias is mainly towards survey respondents being healthier than those not  
2  
3  
4 responding.<sup>32</sup> Other causes for incorrect estimation of the costs for ADEs in our study were the  
5  
6 limitation to ADE status and used resources reported by the respondents. Responses were carefully  
7  
8 examined to exclude responses not indicating a suspected symptom or drug, there may be  
9  
10 symptoms reported that were e.g. resulting from the underlying disease rather than the drug use, and  
11  
12 other relevant symptoms may not have been perceived to be related to the drug use by the  
13  
14 respondent or not being included in the five ADE categories included in the questionnaire. ~~Still,~~  
15  
16 ~~p~~Previous research has shown that there is little overlap between ADEs reported by patients and by  
17  
18 physicians,<sup>33</sup> thus we may underestimate the prevalence and resulting resource use of ADEs by not  
19  
20 including also the physicians' experiences. However, previous research has identified patients  
21  
22 themselves as important actors in reporting adverse events, also due to drug use.<sup>34</sup> Moreover, the  
23  
24 general public is today expected to monitor drug use and report suspected ADRs. Thus we believe  
25  
26 that the self-reported ADEs reported in our survey adds a relevant aspect to the knowledge of drug  
27  
28 use outcomes, although it needs to be acknowledged that the events were self-reported and not  
29  
30 assessed for causality by any experienced clinician. The sensitivity analyses included comparing the  
31  
32 resource use to what was reported in national registers, ~~only including~~ data for hospitalizations and  
33  
34 sick-leave ~~were available in national registers, which also~~ The register analyses indicated an  
35  
36 underreporting rather than ~~overestimating overestimation of~~ the resource use. ~~Yet~~ Moreover, our  
37  
38 main cause for underestimating the COI ~~should~~ may be the limitation of indirect costs to short-term  
39  
40 sick-leave and informal care. In a recent study of the total COI in Sweden, short-term sickness  
41  
42 represented approximately 30% of the indirect costs and 17% of the COI.<sup>35</sup> Lost wages and  
43  
44 household production has been reported to cause 47% of the total costs in patients discharged from  
45  
46 hospital with adverse events (of which ADEs corresponded to 32% of all costs).<sup>36</sup> Our design (time  
47  
48 frame and data collection method) did not allow estimation of indirect costs from disability pension  
49  
50 and mortality, thus underestimating the economic impact of ADEs.  
51  
52  
53  
54  
55  
56  
57  
58  
59  
60

1 Our ADE definition was more inclusive than some previous studies',<sup>3</sup> although the included  
2 categories' associations with drug treatment and drug-related problems has previously been  
3 acknowledged. Based on the ADE definition applied, the prevalence and associated costs will differ.  
4 Limiting the inclusion to only e.g. ADRs and STEs resulted in a prevalence of 13% in the Swedish  
5 population which is equal to the previously estimated ambulatory care prevalence of ADEs.<sup>37</sup> Our  
6 estimated one-month prevalence of ADRs of 7.8% was similar to the 2-week prevalence (6.4%)  
7 identified in a previous survey in the Swedish general public.<sup>6</sup>

8  
9  
10  
11  
12  
13  
14  
15  
16  
17  
18  
19 Our results suggests that the drug users experience ADEs and associated consequences that have so  
20 far not been included in studies of injuries resulting from medical intervention related to drugs, and  
21 thus needs to be further explored to identify causes, consequences and possibilities for prevention.  
22  
23  
24  
25

26 In our study, less than one fifth of respondents with ADEs attended healthcare during the study  
27 period, and on fifth of those with ADRs or STEs reported drug-related healthcare contacts. A  
28 previous study has reported that three quarters of elderly participants experiencing ADRs contacted  
29 a physician and 5% were also hospitalized due to the ADR during a one year study period,<sup>38</sup> but the  
30 disparity may depend on the length of the study period and the age of respondents. Our average  
31 direct costs resulting from ADRs (Int\$ 37) were, as expected, low compared to previous estimates  
32 of approximately Euro 2,800 for ADRs in patients attending hospitals.<sup>39</sup> Though, the small  
33 proportion of respondents reporting healthcare contacts due to their ADR or STE (with no  
34 respondent reporting hospitalization due to an ADR or STE), and the short study period, makes  
35 direct comparisons impossible. Our estimated average direct cost for respondents with ADEs that  
36 attended healthcare during the study period (Int\$ 1,283) was similar to the attributable charges  
37 previously reported for ADEs identified after a visit to ambulatory care: US\$ 926 (2006 value).<sup>40</sup>

38  
39  
40  
41  
42  
43  
44  
45  
46  
47  
48  
49  
50  
51 Our extrapolated annual direct costs for individuals with ADEs (Int\$ 5,953.4 million) equals 17% of  
52 the total healthcare expenditures in Sweden during 2010 (Int\$ 35,257.8 million).<sup>31</sup> The extrapolated  
53 direct costs resulting from ADRs and STEs (Int\$ 370 million) represented a small part of the total  
54  
55  
56  
57  
58  
59  
60

1 ~~healthcare costs, but was comparable to the excess hospital costs estimated for obesity in Sweden~~  
2  
3  
4 ~~(US\$ 269 million in 2003).~~<sup>41</sup>  
5  
6

7  
8 According to our results, there is a need for increased awareness about the impact of ADEs which  
9 does not result in the patient attending hospital. Lundkvist and Jönsson<sup>42</sup> have previously remarked  
10 on the balance between costs of ADRs and benefits of drug treatments, and the two costs of ADRs:  
11 costs resulting from treating the ADR and from avoiding ADRs. Moreover, additional efforts are  
12 needed to handle STE, which seem to be just as common and costly as ADRs. According to our  
13 results, the balancing of costs and benefits for drugs will also include the occurrence of and costs  
14 associated with insufficient effects of medicines, although not all of these costs will be possible to  
15 prevent or avoid through improved drug treatments. Since ADE status seems to be associated with  
16 high overall COI and incur healthcare resource use, many of these patients should be possible to  
17 identify in the healthcare system, even when the ADE in itself may not be the main cause of  
18 resource use. Based on the perspective of a decision or analysis, our results indicate that such costs  
19 will occur also outside the healthcare system, e.g. for sick-leave, informal care and lost leisure time.  
20 The result was strengthened by the propensity score analyses, indicating both direct healthcare  
21 costs, and indirect costs, attributable to ADEs. Thus the patient's views and experiences of drug  
22 treatments needs to be further addressed in treatment decisions.  
23  
24  
25  
26  
27  
28  
29  
30  
31  
32  
33  
34  
35  
36  
37  
38  
39  
40  
41  
42

43 Future research is needed to further analyze the relationship between ADEs and the associated  
44 resource use, to identify when and how the resource use occurs, and the true relationship between  
45 ADEs and the overall COI. There is also a need to examine the indirect costs resulting from ADEs,  
46 since our study could only briefly describe sick-leave and informal care resulting from ADRs and  
47 STEs. Moreover, the resource use identified from patients self-reports should be contrasted by  
48 population-based estimates of ADEs and the associated resource use identified by healthcare  
49 professionals, to enable further analyses of the clinical and economic impact of ADEs, identify  
50  
51  
52  
53  
54  
55  
56  
57  
58  
59  
60

1 high-risk patients, and study the causes and consequences of ADEs in the general public.  
2  
3  
4  
5  
6

## 7 **CONCLUSIONS**

8  
9  
10 To our knowledge, this is the first study estimating the COI of ADEs in the general public. Our  
11 results show that self-reported ADRs and STEs cause resource use both in hospitals and primary  
12 care. Moreover, ADEs seem to be associated with high overall COI from the societal perspective,  
13 when comparing respondents with and without ADEs. There is a need to further examine the  
14 relationships between ADEs and associated resource use and overall COI, respectively, and to study  
15 the indirect costs resulting from ADEs.  
16  
17  
18  
19  
20  
21  
22  
23  
24  
25  
26  
27  
28  
29  
30  
31  
32  
33  
34  
35  
36  
37  
38  
39  
40  
41  
42  
43  
44  
45  
46  
47  
48  
49  
50  
51  
52  
53  
54  
55  
56  
57  
58  
59  
60

## ACKNOWLEDGEMENT

We wish to thank the survey respondents for taking the time to share their experience with us.

## ETHICS APPROVAL

The study received ethical approval from the Regional Ethical Review Board in Gothenburg (approval reference number: 238-10), in 2010.

The questionnaire cover letter included information about how and why the research was conducted, contact information, and how to withdraw. Informed consent was implied by returning the questionnaire. The questionnaire and the cover letter were developed in accordance with the declaration of Helsinki.

The ethical approval did not include an approval to share individual responses or register data publicly.

## COMPETING INTEREST DECLARATION

All authors have completed the Unified Competing Interest form at [www.icmje.org/coi\\_disclosure.pdf](http://www.icmje.org/coi_disclosure.pdf) (available on request from the corresponding author) and declare: all authors had financial support from National Corporation of Swedish Pharmacies (Apoteket AB) for the submitted work; no financial relationships with any organisations that might have an interest in the submitted work in the previous 3 years; no other relationships or activities that could appear to have influenced the submitted work.

The opinions or assertions contained herein are the private views of the authors, and are not to be construed as official or as reflecting the views of the Medical Products Agency.

## FUNDING

The research is part of the DRUMS project (Drug-related morbidity and mortality in Sweden: prevalence, preventability and costs) funded by an unrestricted grant from the National Corporation of Swedish Pharmacies (Apoteket AB). The study sponsor had no role in the study design; in the collection, analysis, and interpretation of data; in the writing of the article; and in the decision to submit it for publication. The researchers work was independent from the sponsor. All authors, external and internal, had full access to all of the data (including statistical reports and tables) in the study and can take responsibility for the integrity of the data and the accuracy of the data analysis.

## DETAILS OF CONTRIBUTORS

KAS was the principal investigator. HG did the analyses and drafted the manuscript. AC, AKJ, CR, HG, KAS and MP contributed to the study design and development of the questionnaire, data

1  
2 analysis, and interpretation of the results and commented on the draft. Also, Katja M Hakkarainen,  
3 Staffan Hägg, Johnny Pettersson and Annika Yeiter contributed to the study design, and the  
4 development and piloting of the questionnaire. Tatiana Zverkova Sandström contributed to the data  
5 analysis. All authors had full access to all data. HG is the guarantor of the study.  
6  
7

## 8 9 **LICENCE FOR PUBLICATION**

10  
11 The Corresponding Author has the right to grant on behalf of all authors and does grant on behalf of  
12 all authors, an exclusive licence (or non-exclusive for UK Crown Employees) on a worldwide basis  
13 to the BMJ Publishing Group Ltd, and its Licensees to permit this article (if accepted) to be  
14 published in BMJ open and any other BMJ PGL products and to exploit all subsidiary rights, as set  
15 out in our licence.  
16  
17  
18  
19  
20  
21  
22  
23  
24  
25  
26  
27  
28  
29  
30  
31  
32  
33  
34  
35  
36  
37  
38  
39  
40  
41  
42  
43  
44  
45  
46  
47  
48  
49  
50  
51  
52  
53  
54  
55  
56  
57  
58  
59  
60

**REFERENCES**

1. Bates DW, Boyle DL, Vander Vliet MB, Schneider J, Leape L. Relationship between medication errors and adverse drug events. *J Gen Intern Med* 1995; **10**(4): 199-205. doi:10.1007/BF02600255.
2. Einarson TR. Drug-related hospital admissions. *Ann Pharmacother* 1993; **27**(7-8): 832-40.
3. Krähenbühl-Melcher A, Schlienger R, Lampert M, Haschke M, Drewe J, Krähenbühl S. Drug-related problems in hospitals: a review of the recent literature. *Drug Saf* 2007; **30**(5): 379-407.
4. Rodríguez-Monguió R, Otero MJ, Rovira J. Assessing the economic impact of adverse drug effects. *Pharmacoeconomics* 2003; **21**(9): 623-50.
5. Gyllensten H, Jönsson AK, Rehnberg C, Carlsten A. How are the costs of drug-related morbidity measured?: a systematic literature review. *Drug Saf* 2012; **35**(3): 207-19. doi:10.2165/11597090-000000000-00000; 10.2165/11597090-000000000-00000.
6. Isacson D, Johansson L, Binglefors K. Nationwide survey of subjectively reported adverse drug reactions in Sweden. *Ann Pharmacother* 2008; **42**(3): 347-53. doi:10.1345/aph.1K488.
7. Segel JE. Cost-of-Illness Studies - A Primer. *RTI International* 2006; : 1-39.

- 1  
2  
3  
4  
5  
6  
7  
8  
9  
10  
11  
12  
13  
14  
15  
16  
17  
18  
19  
20  
21  
22  
23  
24  
25  
26  
27  
28  
29  
30  
31  
32  
33  
34  
35  
36  
37  
38  
39  
40  
41  
42  
43  
44  
45  
46  
47  
48  
49  
50  
51  
52  
53  
54  
55  
56  
57  
58  
59  
60
8. Hakkarainen KM, Andersson Sundell K, Petzold M, Hägg S. Self-reported adverse drug events equally prevalent across age groups - a population-based survey in Sweden. Manuscript submitted for publication. .
  9. Aronson JK, Ferner RE. Clarification of terminology in drug safety. *Drug Saf* 2005; **28**(10): 851-70.
  10. Yu K, Nation R, Dooley M. Multiplicity of medication safety terms, definitions and functional meanings: when is enough enough? *Qual Saf Health Care* 2005; **14**(5): 358-63.
  11. Edwards IR, Aronson JK. Adverse drug reactions: definitions, diagnosis, and management. *Lancet* 2000; **356**(9237): 1255-9. doi:10.1016/S0140-6736(00)02799-9.
  12. European Parliament, Council of the European Union. Directive 2010/84/EU of the European Parliament and of the Council of 15 December 2010 amending, as regards pharmacovigilance, Directive 2001/83/EC on the Community code relating to medicinal products for human use. *Official Journal* 2010; **L 348**: 74-99.
  13. Young AM, Glover N, Havens JR. Nonmedical use of prescription medications among adolescents in the United States: a systematic review. *J Adolesc Health* 2012; **51**(1): 6-17. doi:10.1016/j.jadohealth.2012.01.011; 10.1016/j.jadohealth.2012.01.011.



- 1  
2  
3  
4  
5  
6  
7  
8  
9  
10  
11  
12  
13  
14  
15  
16  
17  
18  
19  
20  
21  
22  
23  
24  
25  
26  
27  
28  
29  
30  
31  
32  
33  
34  
35  
36  
37  
38  
39  
40  
41  
42  
43  
44  
45  
46  
47  
48  
49  
50  
51  
52  
53  
54  
55  
56  
57  
58  
59  
60
14. Taylor S, Abramowitz JS, McKay D. Non-adherence and non-response in the treatment of anxiety disorders. *J Anxiety Disord* 2012; **26**(5): 583-9.  
doi:10.1016/j.janxdis.2012.02.010; 10.1016/j.janxdis.2012.02.010.
  15. Al-Olah YH, Al Thiab KM. Admissions through the emergency department due to drug-related problems. *Ann Saudi Med* 2008; **28**(6): 426-9.
  16. Gandhi TK, Seger DL, Bates DW. Identifying drug safety issues: from research to practice. *Int J Qual Health Care* 2000; **12**(1): 69-76.  
doi:10.1093/intqhc/12.1.69.
  17. Gandhi TK, Weingart SN, Borus J, Seger AC, Bates DW. Adverse drug events in ambulatory care. *N Engl J Med* 2003; **348**(16): 1556-64.  
doi:10.1056/NEJMsa020703.
  18. EuroQol Group. EuroQol--a new facility for the measurement of health-related quality of life. The EuroQol Group. *Health Policy* 1990; **16**(3): 199-208.
  19. Swedish Association of Local Authorities and Regions. Statistik om hälso- och sjukvård samt regional utveckling 2010. 2011; : 1-216.
  20. Swedish Association of Local Authorities and Regions. Kostnad per brukare: jämförelser mellan kommuner inom omsorg om äldre och personer med funktionsnedsättning : utfall 2010. 2011; : 39.
  21. Transport Analysis. Special transport service and inter-municipal transport service 2010. 2011; **2011:16**.

1  
2 22. Transport Analysis. Local and regional public transport 2010. 2011;

3  
4 **2011:19.**

5  
6  
7  
8 23. Lindgren B. Costs of illness in Sweden 1964-1975. Lund, Sweden: Lund  
9  
10 University; 1981.

11  
12  
13  
14 24. Statistics Sweden. Genomsnittlig grund- och månadslön samt kvinnors lön i  
15  
16 procent av mäns lön efter sektor, yrke (SSYK), kön och ålder. År 2005-2010. ;

17  
18  
19 Available at:

20  
21  
22 <http://www.ssd.scb.se/databaser/makro/Visavar.asp?yp=tansss&xu=C9233001&omradekod=AM&huvudtabell=LonYrkeAlder4&omradetext=Arbetsmarknad&tabelltext=Genomsnittlig+grund%2D+och+m%E5nadslo%F6n+samtkvinnors+l%F6n+i+procent+av+m%E4ns+l%F6n+efter+sektor%2C+yrke+%28SSYK%29%2C+k%F6n+och+%E5lder%2E+%C5r&preskat=O&prodid=AM0110&deltabell=&deltabellnamn=Genomsnittlig+grund%2D+och+m%E5nadslo%F6n+samtkvinnors+l%F6n+i+procent+av+m%E4ns+l%F6n+efter+sektor%2C+yrke+%28SSYK%29%2C+k%F6n+och+%E5lder%2E+%C5r&innehall=Antal&starttid=2005&stopptid=2010&Fromwhere=M&lang=1&langdb=1>. Accessed 03/06, 2012.

23  
24  
25  
26  
27  
28  
29  
30  
31  
32  
33  
34  
35  
36  
37  
38  
39  
40  
41  
42  
43  
44  
45  
46  
47 25. Statistics Sweden. Mer om Arbetskostnadsindex (AKI). ; Available at:

48  
49 [http://www.scb.se/Pages/Standard\\_23066.aspx](http://www.scb.se/Pages/Standard_23066.aspx). Accessed 11/26, 2012.

- 1  
2  
3  
4  
5  
6  
7  
8  
9  
10  
11  
12  
13  
14  
15  
16  
17  
18  
19  
20  
21  
22  
23  
24  
25  
26  
27  
28  
29  
30  
31  
32  
33  
34  
35  
36  
37  
38  
39  
40  
41  
42  
43  
44  
45  
46  
47  
48  
49  
50  
51  
52  
53  
54  
55  
56  
57  
58  
59  
60
26. Herdman M, Gudex C, Lloyd A, et al. Development and preliminary testing of the new five-level version of EQ-5D (EQ-5D-5L). *Qual Life Res* 2011; **20**(10): 1727-36. doi:10.1007/s11136-011-9903-x.
27. EuroQol Group. EQ-5D-5L Crosswalk Value Sets. 2012; Available at: <http://www.euroqol.org/about-eq-5d/valuation-of-eq-5d/eq-5d-5l-value-sets.html>. Accessed 11/26, 2012.
28. Organisation for economic co-operation and development. PPPs and exchange rates. ; Available at: <http://stats.oecd.org/Index.aspx?DataSetCode=CPL#>. Accessed 09/24, 2012.
29. Evans DB, Edejer TT, Adam T, Lim SS. Methods to assess the costs and health effects of interventions for improving health in developing countries. *BMJ* 2005; **331**(7525): 1137-40. doi:10.1136/bmj.331.7525.1137.
30. Leuven E, Sianesi B. PSMATCH2: Stata module to perform full Mahalanobis and propensity score matching, common support graphing, and covariate imbalance testing. *Statistical Software Components* 2003; **April 2012 revision**.
31. Statistics Sweden. Svenska hälsoräkenskaper 2001-2010. ; Available at: [http://www.scb.se/Pages/ProductTables\\_231546.aspx](http://www.scb.se/Pages/ProductTables_231546.aspx). Accessed 06/28, 2012.
32. Suominen S, Koskenvuo K, Sillanmaki L, et al. Non-response in a nationwide follow-up postal survey in Finland: a register-based mortality analysis

1  
2 of respondents and non-respondents of the Health and Social Support (HeSSup)  
3  
4 Study. *BMJ Open* 2012; **2**(2): e000657. doi:10.1136/bmjopen-2011-000657.  
5  
6

7  
8 33. Morimoto T, Gandhi TK, Seger AC, Hsieh TC, Bates DW. Adverse drug  
9  
10 events and medication errors: detection and classification methods. *Qual Saf*  
11  
12 *Health Care* 2004; **13**(4): 306-14. doi:10.1136/qhc.13.4.306.  
13  
14

15  
16  
17 34. Zhu J, Stuver SO, Epstein AM, Schneider EC, Weissman JS, Weingart SN.  
18  
19 Can we rely on patients' reports of adverse events? *Med Care* 2011; **49**(10): 948-  
20  
21 55. doi:10.1097/MLR.0b013e31822047a8; 10.1097/MLR.0b013e31822047a8.  
22  
23

24  
25  
26 35. Ramsberg J, Ekelund M. Stuprörstänkande gör samhällets kostnader för  
27  
28 ohälsa onödigt höga. *Ekonomisk debatt* 2011; **39**(5): 41,53. Swedish.  
29  
30

31  
32 36. Thomas EJ, Studdert DM, Newhouse JP, Zbar B, Howard KM, Williams EJ,  
33  
34 Brennan TA. Costs of medical injuries in Utah and Colorado. *Inquiry* 1999; **36**(3):  
35  
36 255-64.  
37  
38

39  
40  
41 37. Taché SV, Sönnichsen A, Ashcroft DM. Prevalence of adverse drug events  
42  
43 in ambulatory care: a systematic review. *Ann Pharmacother* 2011; **45**(7-8): 977-  
44  
45 89. doi:10.1345/aph.1P627.  
46  
47

48  
49 38. Chrischilles EA, Segar ET, Wallace RB. Self-reported adverse drug  
50  
51 reactions and related resource use. A study of community-dwelling persons 65  
52  
53 years of age and older. *Ann Intern Med* 1992; **117**(8): 634-40.  
54  
55  
56  
57  
58  
59  
60

- 1  
2  
3  
4  
5  
6  
7  
8  
9  
10  
11  
12  
13  
14  
15  
16  
17  
18  
19  
20  
21  
22  
23  
24  
25  
26  
27  
28  
29  
30  
31  
32  
33  
34  
35  
36  
37  
38  
39  
40  
41  
42  
43  
44  
45  
46  
47  
48  
49  
50  
51  
52  
53  
54  
55  
56  
57  
58  
59  
60
39. Gautier S, Bachelet H, Bordet R, Caron J. The cost of adverse drug reactions. *Expert Opin Pharmacother* 2003; **4**(3): 319-26.
40. Burton MM, Hope C, Murray MD, Hui S, Overhage JM. The cost of adverse drug events in ambulatory care. *AMIA Annu Symp Proc* 2007; : 90-3.
41. Borg S, Persson U, Odegaard K, Berglund G, Nilsson JA, Nilsson PM. Obesity, survival, and hospital costs-findings from a screening project in Sweden. *Value Health* 2005; **8**(5): 562-71. doi:10.1111/j.1524-4733.2005.00048.x.
42. Lundkvist J, Jönsson B. Pharmacoeconomics of adverse drug reactions. *Fundam Clin Pharmacol* 2004; **18**(3): 275-80.

## STROBE statement checklist of items that should be included in the report:

|                           | Item No | Recommendation                                                                                                                                                                                                                                                                                                                                                                                                                                                                                                              | Comments about our paper                                                                                                                  |
|---------------------------|---------|-----------------------------------------------------------------------------------------------------------------------------------------------------------------------------------------------------------------------------------------------------------------------------------------------------------------------------------------------------------------------------------------------------------------------------------------------------------------------------------------------------------------------------|-------------------------------------------------------------------------------------------------------------------------------------------|
| <b>Title and abstract</b> |         |                                                                                                                                                                                                                                                                                                                                                                                                                                                                                                                             |                                                                                                                                           |
|                           | 1       | (a) Indicate the study's design with a commonly used term in the title or the abstract                                                                                                                                                                                                                                                                                                                                                                                                                                      | √ Title: Population-based cross-sectional survey<br>√ Abstract: cross-sectional study                                                     |
|                           |         | (b) Provide in the abstract an informative and balanced summary of what was done and what was found                                                                                                                                                                                                                                                                                                                                                                                                                         | √ What was done: Methods<br>√ What was found: Results                                                                                     |
| <b>Introduction</b>       |         |                                                                                                                                                                                                                                                                                                                                                                                                                                                                                                                             |                                                                                                                                           |
| Background/rationale      | 2       | Explain the scientific background and rationale for the investigation being reported                                                                                                                                                                                                                                                                                                                                                                                                                                        | √ Introduction                                                                                                                            |
| Objectives                | 3       | State specific objectives, including any prespecified hypotheses                                                                                                                                                                                                                                                                                                                                                                                                                                                            | √ Aim in Introduction<br>No prespecified hypotheses, descriptive analysis only                                                            |
| <b>Methods</b>            |         |                                                                                                                                                                                                                                                                                                                                                                                                                                                                                                                             |                                                                                                                                           |
| Study design              | 4       | Present key elements of study design early in the paper                                                                                                                                                                                                                                                                                                                                                                                                                                                                     | √ Title, Introduction and Methods                                                                                                         |
| Setting                   | 5       | Describe the setting, locations, and relevant dates, including periods of recruitment, exposure, follow-up, and data collection                                                                                                                                                                                                                                                                                                                                                                                             | √ Abstract and Methods/Participants and data collection                                                                                   |
| Participants              | 6       | (a) <i>Cohort study</i> : Give the eligibility criteria, and the sources and methods of selection of participants. Describe methods of follow-up<br><i>Case-control study</i> : Give the eligibility criteria, and the sources and methods of case ascertainment and control selection. Give the rationale for the choice of cases and controls<br><i>Cross sectional study</i> : Give the eligibility criteria, and the sources and methods of selection of participants                                                   | √ Methods/Participants and data collection                                                                                                |
|                           |         | (b) <i>Cohort study</i> : For matched studies, give matching criteria and number of exposed and unexposed<br><i>Case-control study</i> : For matched studies, give matching criteria and the number of controls per case                                                                                                                                                                                                                                                                                                    | N/A                                                                                                                                       |
| Variables                 | 7       | Clearly define all outcomes, exposures, predictors, potential confounders, and effect modifiers. Give diagnostic criteria, if applicable                                                                                                                                                                                                                                                                                                                                                                                    | √ Aim: Outcomes/diagnostic criteria: self-reported ADE<br>No analysis of predictors, confounders or effect modifiers                      |
| Data sources/measurement  | 8*      | For each variable of interest, give sources of data and details of methods of assessment (measurement). Describe comparability of assessment methods if there is more than one group                                                                                                                                                                                                                                                                                                                                        | √ Methods                                                                                                                                 |
| Bias                      | 9       | Describe any efforts to address potential sources of bias                                                                                                                                                                                                                                                                                                                                                                                                                                                                   | √ Methods: Reminders were sent out.                                                                                                       |
| Study size                | 10      | Explain how the study size was arrived at                                                                                                                                                                                                                                                                                                                                                                                                                                                                                   | √ Methods/Participants and data collection                                                                                                |
| Quantitative variables    | 11      | Explain how quantitative variables were handled in the analyses. If applicable, describe which groupings were chosen and why                                                                                                                                                                                                                                                                                                                                                                                                | √ Methods/Analyses                                                                                                                        |
| Statistical methods       | 12      | (a) Describe all statistical methods, including those used to control for confounding<br>(b) Describe any methods used to examine subgroups and interactions<br>(c) Explain how missing data were addressed<br>(d) <i>Cohort study</i> : If applicable, explain how loss to follow-up was addressed<br><i>Case-control study</i> : If applicable, explain how matching of cases and controls was addressed<br><i>Cross sectional study</i> : If applicable, describe analytical methods taking account of sampling strategy | √ Methods/Analyses (no control for confounding)<br>√ Methods/Analyses (no interactions tested)<br>√ Methods/Analyses (minimum estimation) |
|                           |         | (e) Describe any sensitivity analyses                                                                                                                                                                                                                                                                                                                                                                                                                                                                                       | N/A<br>√ Methods/Analyses                                                                                                                 |

1  
2  
3  
4  
5  
6  
7  
8  
9  
10  
11  
12  
13  
14  
15  
16  
17  
18  
19  
20  
21  
22  
23  
24  
25  
26  
27  
28  
29  
30  
31  
32  
33  
34  
35  
36  
37  
38  
39  
40  
41  
42  
43  
44  
45  
46  
47  
48  
49

|                          | Item No | Recommendation                                                                                                                                                                                                                                                                                              | Comments about our paper                                                                           |
|--------------------------|---------|-------------------------------------------------------------------------------------------------------------------------------------------------------------------------------------------------------------------------------------------------------------------------------------------------------------|----------------------------------------------------------------------------------------------------|
| <b>Results</b>           |         |                                                                                                                                                                                                                                                                                                             |                                                                                                    |
| Participants             | 13*     | (a) Report numbers of individuals at each stage of study: eg numbers potentially eligible, examined for eligibility, confirmed eligible, included in the study, completing follow-up, and analysed<br>(b) Give reasons for non-participation at each stage<br>(c) Consider use of a flow diagram            | √ Results, paragraph 1<br><br>N/A: Lack information about reasons for non-participation<br><br>N/A |
| Descriptive data         | 14*     | (a) Give characteristics of study participants (eg demographic, clinical, social) and information on exposures and potential confounders<br>(b) Indicate number of participants with missing data for each variable of interest<br>(c) Cohort study: Summarise follow up time (eg average and total amount) | √ Tables 1 and 3<br><br>√ Table 1 (when relevant)                                                  |
| Outcome data             | 15*     | Cohort study: Report numbers of outcome events or summary measures over time<br>Case-control study: Report numbers in each exposure category, or summary measures of exposure<br>Cross sectional study: Report numbers of outcome events or summary measures                                                | √ Results, table 2                                                                                 |
| Main results             | 16      | (a) Report the numbers of individuals at each stage of the study: eg numbers potentially eligible, examined for eligibility, confirmed eligible, included in the study, completing follow-up, and analysed<br>(b) Give reasons for non-participation at each stage<br>(c) Consider use of a flow diagram    | √ Results<br><br>N/A: Lack information about reasons for non-participation (see item 13c)          |
| Other analyses           | 17      | Report other analyses done: eg analyses of subgroups and interactions, and sensitivity analyses                                                                                                                                                                                                             | √ Results, table 3                                                                                 |
| <b>Discussion</b>        |         |                                                                                                                                                                                                                                                                                                             |                                                                                                    |
| Key results              | 18      | Summarise key results with reference to study objectives                                                                                                                                                                                                                                                    | √ Discussion, paragraph 1                                                                          |
| Limitations              | 19      | Discuss limitations of the study, taking into account sources of potential bias or imprecision. Discuss both direction and magnitude of any potential bias                                                                                                                                                  | √ Direction and magnitude: Discussion/Strengths and weaknesses                                     |
| Interpretation           | 20      | Give a cautious overall interpretation of results considering objectives, limitations, multiplicity of analyses, results from similar studies, and other relevant evidence                                                                                                                                  | √ Discussion, Comparison with previous research                                                    |
| Generalisability         | 21      | Discuss the generalisability (external validity) of the study results                                                                                                                                                                                                                                       | √ Discussion, Comparison with previous research                                                    |
| <b>Other information</b> |         |                                                                                                                                                                                                                                                                                                             |                                                                                                    |
| Funding                  | 22      | Give the source of funding and the role of the funders for the present study and, if applicable, for the original study on which the present article is based                                                                                                                                               | √ Funding                                                                                          |

\*Give information separately for cases and controls in case-control studies and, if applicable, for exposed and unexposed groups in cohort and cross sectional studies.

## Health economic checklist of items to be reported:

|                                               | Item No | Checklist item                                                                                                                            | Page in our paper where the item is dealt with                                                             |
|-----------------------------------------------|---------|-------------------------------------------------------------------------------------------------------------------------------------------|------------------------------------------------------------------------------------------------------------|
| <b>Study design</b>                           |         |                                                                                                                                           |                                                                                                            |
|                                               | 1       | The research question is stated                                                                                                           | √ Introduction, paragraph 3                                                                                |
|                                               | 2       | The economic importance of the research question is stated                                                                                | √ Introduction, paragraph 2                                                                                |
|                                               | 3       | The viewpoint(s) of the analysis are clearly stated and justified                                                                         | √ Methods/Analyses paragraph 1                                                                             |
|                                               | 4       | The rationale for choosing the alternative programmes or interventions compared is stated                                                 | N/A: No programmes or interventions compared                                                               |
|                                               | 5       | The alternatives being compared are clearly described                                                                                     | N/A: No programmes or interventions compared                                                               |
|                                               | 6       | The form of economic evaluation used is stated                                                                                            | √ Methods/Analyses paragraph 1                                                                             |
|                                               | 7       | The choice of form of economic evaluation is justified in relation to the questions addressed                                             | √ Introduction, paragraph 2                                                                                |
| <b>Data collection</b>                        |         |                                                                                                                                           |                                                                                                            |
|                                               | 8       | The source(s) of effectiveness estimates used are stated                                                                                  | N/A: No effectiveness estimates are used.                                                                  |
|                                               | 9       | Details of the design and results of effectiveness study are given (if based on a single study)                                           | N/A: no effectiveness measured                                                                             |
|                                               | 10      | Details of the method of synthesis or meta-analysis of estimates are given (if based on an overview of a number of effectiveness studies) | N/A: no synthesis or meta-analysis of effectiveness studies                                                |
|                                               | 11      | The primary outcome measure(s) for the economic evaluation are clearly stated                                                             | √ Methods/Analyses paragraph 1                                                                             |
|                                               | 12      | Methods to value health states and other benefits are stated                                                                              | √ Methods/Costs of resource use, paragraphs 1-4                                                            |
|                                               | 13      | Details of the subjects from whom valuations were obtained are given                                                                      | √ Methods/Participants and data collection, paragraph 1                                                    |
|                                               | 14      | Productivity changes (if included) are reported separately                                                                                | √ Table 2                                                                                                  |
|                                               | 15      | The relevance of productivity changes to the study question is discussed                                                                  | N/A: only descriptive data                                                                                 |
|                                               | 16      | Quantities of resources are reported separately from their unit costs                                                                     | √ Table 2                                                                                                  |
|                                               | 17      | Methods for the estimation of quantities and unit costs are described                                                                     | √ Methods/Participants and data collection, paragraph 2-3;<br>Methods/Costs of resource use, paragraph 1-4 |
|                                               | 18      | Currency and price data are recorded                                                                                                      | √ Methods, sections about Direct costs, Indirect costs, and Analyses<br>Table 2                            |
|                                               | 19      | Details of currency of price adjustments for inflation or currency conversion are given                                                   | √ Methods/Analyses                                                                                         |
|                                               | 20      | Details of any model used are given                                                                                                       | N/A: No model used                                                                                         |
|                                               | 21      | The choice of model used and the key parameters on which it is based are justified                                                        | N/A: No model used                                                                                         |
| <b>Analysis and interpretation of results</b> |         |                                                                                                                                           |                                                                                                            |
|                                               | 22      | Time horizon of costs and benefits is stated                                                                                              | √ Methods/Analyses paragraph 2                                                                             |
|                                               | 23      | The discount rate(s) is stated                                                                                                            | N/A: No discounts made                                                                                     |
|                                               | 24      | The choice of rate(s) is justified                                                                                                        | N/A: No discounts made                                                                                     |
|                                               | 25      | An explanation is given if costs or benefits are not discounted                                                                           | √ Methods/Indirect costs                                                                                   |
|                                               | 26      | Details of statistical tests and confidence intervals are given for stochastic data                                                       | √ Methods/Analyses                                                                                         |



1  
2  
3  
4  
5  
6  
7  
8  
9  
10  
11  
12  
13  
14  
15  
16  
17  
18  
19  
20  
21  
22  
23  
24  
25  
26  
27  
28  
29  
30  
31  
32  
33  
34  
35  
36  
37  
38  
39  
40  
41  
42  
43  
44  
45  
46  
47  
48  
49

| Item No | Checklist item                                                             | Page in our paper where the item is dealt with            |
|---------|----------------------------------------------------------------------------|-----------------------------------------------------------|
| 27      | The approach to sensitivity analysis is given                              | √ Methods/Analyses paragraph 2                            |
| 28      | The choice of variables for sensitivity analysis is justified              | √ Methods/Sensitivity analyses                            |
| 29      | The ranges over which the variables are varied are stated                  | N/A: Costs based on national statistics, no ranges tested |
| 30      | Relevant alternatives are compared                                         | N/A: No programmes or interventions compared              |
| 31      | Incremental analysis is reported                                           | N/A: No incremental analysis made                         |
| 32      | Major outcomes are presented in a disaggregated as well as aggregated form | √ Tables 2-3                                              |
| 33      | The answer to the study question is given                                  | √ Results, paragraphs 2-3                                 |
| 34      | Conclusions follow from the data reported                                  | √ Conclusions                                             |
| 35      | Conclusions are accompanied by the appropriate caveats                     | √ Conclusions                                             |

Authors may enter N/A if an item on the checklist is not appropriate, but this is only acceptable for items 9, 10, 12-15, 20, 21, 23-29, and 31.

Peer review only

Figure 1: Accumulated direct costs of individuals with self-reported ADEs, including the subgroup reporting ADRs or STEs.

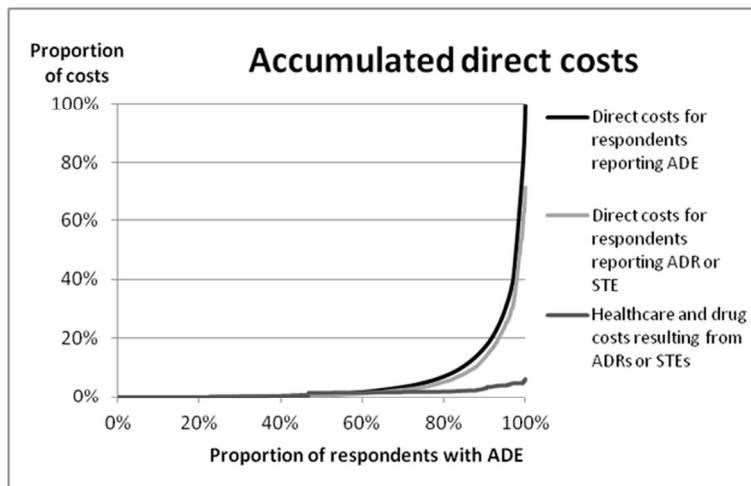

Abbreviations: ADE = adverse drug events; ADR = adverse drug reaction; STE = sub-therapeutic effect of medication therapy.

133x90mm (300 x 300 DPI)

Review only

1  
2  
3  
4  
5  
6  
7  
8  
9  
10  
11  
12  
13  
14  
15  
16  
17  
18  
19  
20  
21  
22  
23  
24  
25  
26  
27  
28  
29  
30  
31  
32  
33  
34  
35  
36  
37  
38  
39  
40  
41  
42  
43  
44  
45  
46  
47  
48  
49  
50  
51  
52  
53  
54  
55  
56  
57  
58  
59  
60

Figure 2: The average monthly cost-of-illness of respondents based on reported ADE-status and healthcare attendance, divided into direct and indirect costs.

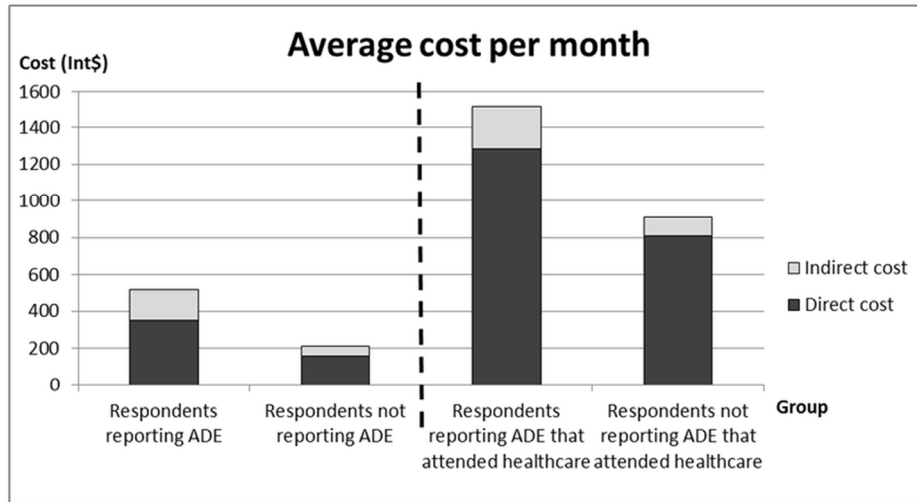

Abbreviations: ADE = adverse drug events; Int\$ = international dollars.

135x90mm (300 x 300 DPI)

Review only

Figure 3: Dimensions of health-related quality of life, health profile results from the EQ-5D™ instrument, the severity reported for each domain used as 1-5 point Likert scale (from 'no problem' to 'extreme problem'), categorized based on reported ADE-status.

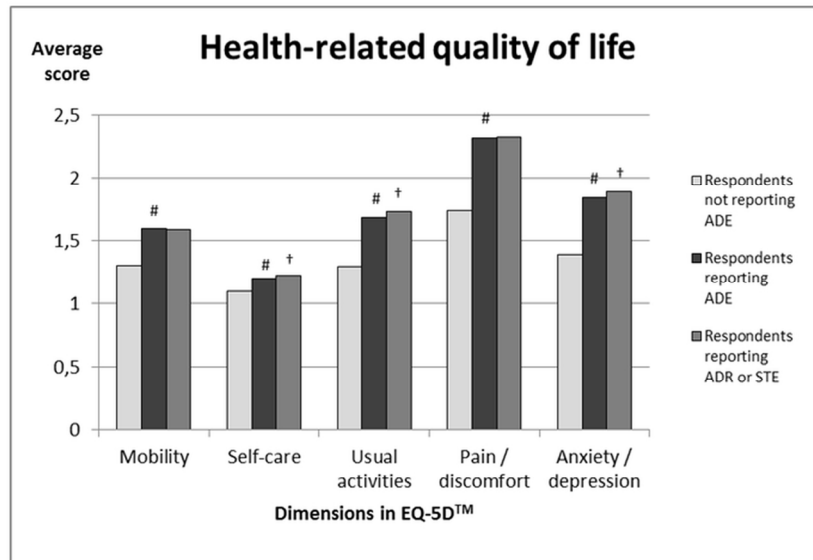

132x90mm (300 x 300 DPI)
